# Supplementary material for: Synthesis, Antiproliferative Evaluation and QSAR Analysis of Novel Halogen- and Amidino-Substituted Benzothiazoles and Benzimidazoles
Source: MDPI journal article supplement (doi:10.3390/ijms232415843), 2022-12-13

## Supplementary Material

### Synthesis, antiproliferative evaluation and QSAR analysis of novel halogen- and amidino-substituted benzothiazoles and benzimidazoles

Valentina Rep Kaulić<sup>1</sup>, Livio Racane<sup>2</sup>, Marijana Leventić<sup>3</sup>, Domagoj Šubarić<sup>4</sup>, Vesna Rastija<sup>4</sup>, Ljubica Glavaš-Obrovac<sup>3\*</sup>, Silvana Raić-Malić<sup>1\*</sup>

<sup>1</sup> Department of Organic Chemistry, Faculty of Chemical Engineering and Technology, University of Zagreb, Marulićev trg 20, 10000 Zagreb, Croatia; vrep@fkit.hr

<sup>2</sup> Department of Applied Chemistry, Faculty of Textile Technology, University of Zagreb, Prilaz baruna Filipovića 28; 10000 Zagreb, Croatia; livio.racane@ttf.unizg.hr

<sup>3</sup> Department of Medicinal Chemistry, Biochemistry and Laboratory Medicine, Faculty of Medicine Osijek, University Josip Juraj Strossmayer of Osijek, Josipa Huttlera 4, 31000 Osijek, Croatia; lgobrovac@mefos.hr

<sup>4</sup> Faculty of Agrobiotechnical Sciences Osijek, Josip Juraj Strossmayer University of Osijek, Vladimira Preloga 1, 31000 Osijek, Croatia; vrastija@fazos.hr

| Content                                                                                        | Pages   |
|------------------------------------------------------------------------------------------------|---------|
| <i>In vitro</i> growth-inhibitory effects of novel compounds with calculated selectivity index | S2-S4   |
| Experimental and calculated logIC <sub>50</sub>                                                | S5-S9   |
| <sup>1</sup> H and <sup>13</sup> C NMR spectra of novel compounds                              | S10-S74 |

**Table S1.** *In vitro* growth-inhibitory effects of compounds **15a–26a**, **15b–26b**, and **15c–26c** on selected tumor cell lines with calculated selectivity index.

| Cpd         | IC <sub>50</sub> (μM) <sup>1</sup> |             |             |           |         |             |           |         |             |           |         |
|-------------|------------------------------------|-------------|-------------|-----------|---------|-------------|-----------|---------|-------------|-----------|---------|
|             | MDCK1                              | BJ          | HeLa        | SI (MDCK) | SI (BJ) | CaCo-2      | SI (MDCK) | SI (BJ) | HuT78       | SI (MDCK) | SI (BJ) |
| <b>15a</b>  | >100                               | >100        | >100        | -         | -       | >100        | -         | -       | >100        | -         | -       |
| <b>15b</b>  | >100                               | >100        | >100        | -         | -       | >100        | -         | -       | >100        | -         | -       |
| <b>15c</b>  | 79.3 ± 14.4                        | 100         | >100        | -         | -       | >100        | -         | -       | >100        | -         | -       |
| <b>16a</b>  | 87.3 ± 6.9                         | >100        | >100        | -         | -       | >100        | -         | -       | >100        | -         | -       |
| <b>16b</b>  | 25.8 ± 9.4                         | >100        | >100        | -         | -       | 89.3 ± 15.8 | -         | -       | 69.8 ± 15.5 | -         | 1.43    |
| <b>16c</b>  | 6.8 ± 6.2                          | >100        | >100        | -         | -       | >100        | -         | -       | >100        | -         | -       |
| <b>17a</b>  | 100                                | >100        | >100        | -         | -       | >100        | -         | -       | >100        | -         | -       |
| <b>17b</b>  | >100                               | >100        | >100        | -         | -       | >100        | -         | -       | >100        | -         | -       |
| <b>17c</b>  | 78.0 ± 27.8                        | >100        | >100        | -         | -       | >100        | -         | -       | >100        | -         | -       |
| <b>18a</b>  | 17.6 ± 5.7                         | >100        | 42.4 ± 7.5  | -         | -       | 100         | -         | -       | 13.2 ± 1.2  | -         | 3.2     |
| <b>18b</b>  | 29.8 ± 17.7                        | >100        | >100        | -         | -       | >100        | -         | -       | 100         | -         | -       |
| <b>18c</b>  | 41.4 ± 8.1                         | >100        | 67.3 ± 7.8  | -         | -       | >100        | -         | -       | 55.6 ± 34.6 | -         | -       |
| <b>19a</b>  | 1.1 ± 0.2                          | >100        | >100        | -         | -       | >100        | -         | -       | >100        | -         | -       |
| <b>19b</b>  | 16.3 ± 11.5                        | >100        | >100        | -         | -       | >100        | -         | -       | 100         | -         | -       |
| <b>19c</b>  | 1.1 ± 0.2                          | >100        | >100        | -         | -       | >100        | -         | -       | >100        | -         | -       |
| <b>20a</b>  | 65.7 ± 11.8                        | >100        | >100        | -         | -       | >100        | -         | -       | >100        | -         | -       |
| <b>20b</b>  | 94.2 ± 18.4                        | >100        | >100        | -         | -       | 28.7 ± 16.7 | 3.28      | 3.48    | >100        | -         | -       |
| <b>20c</b>  | 85.9 ± 15.7                        | 100         | >100        | -         | -       | 89.2 ± 16.8 | -         | 1.12    | 64.7 ± 11.3 | 1.33      | 1.55    |
| <b>21a</b>  | 12.6 ± 4.8                         | >100        | 100         | -         | -       | >100        | -         | -       | 6.8 ± 6.2   | 1.85      | 14.7    |
| <b>21b</b>  | 10.1 ± 4.5                         | 84.1 ± 24.7 | 100         | -         | -       | >100        | -         | -       | 3.6 ± 3.1   | 2.8       | 23.36   |
| <b>21c</b>  | 43.2 ± 12.4                        | >100        | 100         | -         | -       | >100        | -         | -       | 24.3 ± 6.5  | 1.78      | 4.11    |
| <b>22a</b>  | 1.1 ± 0.2                          | >100        | 54.5 ± 29.4 | -         | -       | 73.5 ± 4.5  | -         | -       | 14.9 ± 10.8 | -         | 6.71    |
| <b>22b</b>  | 1.0 ± 0.0                          | 86.4 ± 20.9 | 50.6 ± 19.3 | -         | -       | 100         | -         | -       | 9.1 ± 2.8   | -         | 9.49    |
| <b>22c</b>  | 0.7 ± 0.3                          | >100        | 100         | -         | -       | >100        | -         | -       | 38.1 ± 23.4 | -         | 2.62    |
| <b>23a</b>  | 40.7 ± 5.7                         | >100        | 52.4 ± 18.4 | -         | -       | 95.6 ± 6.6  | -         | -       | 19.0 ± 4.0  | 2.14      | 5.26    |
| <b>23b</b>  | 27.4 ± 4.2                         | 40.5 ± 17.2 | 34.9 ± 14.8 | -         | -       | 56.0 ± 14.6 | -         | -       | 17.1 ± 7.7  | 1.6       | 2.34    |
| <b>23c</b>  | 29.5 ± 7.2                         | 100         | 45.7 ± 16.3 | -         | -       | 96.4 ± 13.3 | -         | -       | 20.0 ± 8.7  | -         | 5.0     |
| <b>24a</b>  | 11.4 ± 14.5                        | >100        | >100        | -         | -       | >100        | -         | -       | >100        | -         | -       |
| <b>24b</b>  | 8.8 ± 8.3                          | >100        | >100        | -         | -       | >100        | -         | -       | >100        | -         | -       |
| <b>24c</b>  | 41.1 ± 17.2                        | >100        | 82.8 ± 32.3 | -         | -       | >100        | -         | -       | 49.6 ± 38.0 | -         | 2.0     |
| <b>25a</b>  | 8.2 ± 5.8                          | 10 ± 0.01   | >100        | -         | -       | >100        | -         | -       | >100        | -         | -       |
| <b>25b</b>  | 51.3 ± 4.6                         | >100        | >100        | -         | -       | >100        | -         | -       | 19.7 ± 10.6 | 2.6       | 5.07    |
| <b>25c</b>  | 22.8 ± 4.9                         | >100        | >100        | -         | -       | 77.6 ± 43.3 | -         | -       | >100        | -         | -       |
| <b>26a</b>  | 36.7 ± 18.0                        | >100        | >100        | -         | -       | >100        | -         | -       | >100        | -         | -       |
| <b>26b</b>  | 64.8 ± 38.5                        | >100        | >100        | -         | -       | >100        | -         | -       | >100        | -         | -       |
| <b>26c</b>  | 8.5 ± 6.4                          | 76.7 ± 27.7 | 23.3 ± 15.3 | -         | -       | 100         | -         | -       | 23.7 ± 5.2  | -         | 3.24    |
| <b>5-FU</b> | 55.0 ± 8.7                         | 74.0 ± 3.1  | 8.2 ± 1.9   | 6.7       | 9.02    | 5.9 ± 0.7   | 9.32      | 7.94    | >100        | -         | -       |

<sup>1</sup> IC<sub>50</sub> – Compound concentration that inhibited cell growth by 50 %. Data represents mean IC<sub>50</sub> (μM) values ± standard deviation (SD) of three independent experiments. Exponentially growing cells were treated with compounds during 72 hrs. Cytotoxicity was analysed using MTT survival assay. **5-FU**: 5-Fluorouracil. SI = IC<sub>50</sub> normal cell line (MDCK1 or BJ)/IC<sub>50</sub> for respective cancerous cell line.

**Table S2.** *In vitro* growth-inhibitory effects of benzothiazoles **34a–38a**, **40a**, **41a**, **34b**, **36b–38b**, **40b**, **34c–37c**, **39c–41c** and benzimidazoles **42a–49a**, **42b–45b**, **47b–49b**, **42c–46c**, **48c**, and **49c** on selected tumor and normal cell lines with calculated selectivity index.

| Cpd         | IC <sub>50</sub> (μM) <sup>1</sup> |             |             |           |         |            |           |         |             |           |         |
|-------------|------------------------------------|-------------|-------------|-----------|---------|------------|-----------|---------|-------------|-----------|---------|
|             | MDCK1                              | BJ          | HeLa        | SI (MDCK) | SI (BJ) | CaCo-2     | SI (MDCK) | SI (BJ) | HuT78       | SI (MDCK) | SI (BJ) |
| <b>34a</b>  | 2.8 ± 0.3                          | 3.9 ± 0.3   | 3.4 ± 0.2   | -         | -       | 4.0 ± 0.2  | -         | -       | 2.2 ± 0.3   | -         | -       |
| <b>34b</b>  | 2.2 ± 0.3                          | 11.2 ± 6.0  | 4.5 ± 4.3   | -         | -       | 7.0 ± 5.4  | -         | -       | 2.1 ± 0.2   | -         | -       |
| <b>34c</b>  | 2.1 ± 0.3                          | 4.0 ± 0.1   | 3.1 ± 0.2   | -         | -       | 6.3 ± 3.0  | -         | -       | 1.8 ± 0.7   | -         | -       |
| <b>35a</b>  | 2.7 ± 0.3                          | 3.2 ± 0.3   | 18.9 ± 3.6  | -         | -       | 26.7 ± 2.1 | -         | -       | 1.4 ± 0.2   | -         | -       |
| <b>35c</b>  | 7.5 ± 3.5                          | 6.7 ± 4.9   | 21.8 ± 5.5  | -         | -       | 18.2 ± 3.3 | -         | -       | 6.2 ± 2.7   | -         | -       |
| <b>36a</b>  | 31.8 ± 4.0                         | 38.5 ± 4.6  | 62.6 ± 22.0 | -         | -       | 24.8 ± 9.2 | -         | -       | 4.4 ± 3.9   | 7.23      | 8.75    |
| <b>36b</b>  | 25.2 ± 1.3                         | 32.6 ± 3.4  | 30.0 ± 1.0  | -         | -       | 38.3 ± 1.2 | -         | -       | 1.8 ± 0.4   | 14        | 18.11   |
| <b>36c</b>  | 100                                | >100        | >100        | -         | -       | >100       | -         | -       | 1.6 ± 0.8   | 62.5      | 62.5    |
| <b>37a</b>  | 1.5 ± 0.3                          | 4.3 ± 3.6   | 3.6 ± 0.1   | -         | -       | 3.7 ± 1.5  | -         | -       | 1.6 ± 0.8   | -         | 2.69    |
| <b>37b</b>  | 2.4 ± 0.3                          | 5.3 ± 2.9   | 4.0 ± 0.4   | -         | -       | 6.1 ± 2.7  | -         | -       | 2.1 ± 0.2   | -         | 2.52    |
| <b>37c</b>  | 2.6 ± 0.1                          | 4.8 ± 3.5   | 3.4 ± 0.2   | -         | -       | 4.5 ± 2.7  | -         | -       | 3.0 ± 1.0   | -         | 1.6     |
| <b>38a</b>  | 27.1 ± 3.4                         | 22.6 ± 4.6  | 19.7 ± 3.1  | -         | -       | 25.4 ± 3.5 | -         | -       | 16.2 ± 5.5  | 1.67      | 1.39    |
| <b>38b</b>  | 26.6 ± 3.1                         | 32.2 ± 2.8  | 22.1 ± 1.2  | -         | -       | 19.4 ± 4.7 | 1.37      | 1.66    | 4.0 ± 0.9   | 6.65      | 8.05    |
| <b>39c</b>  | 100                                | 38.1 ± 1.4  | >100        | -         | -       | 34.7 ± 2.8 | 2.87      | -       | 12.7 ± 0.9  | 7.87      | 3       |
| <b>40a</b>  | 59.4 ± 18.8                        | >100        | 100         | -         | -       | 100        | -         | -       | 100         | -         | -       |
| <b>40b</b>  | >100                               | >100        | >100        | -         | -       | >100       | -         | -       | 37.3 ± 12.8 | 2.68      | 2.68    |
| <b>40c</b>  | >100                               | 100         | >100        | -         | -       | >100       | -         | -       | 100         | -         | -       |
| <b>41a</b>  | 58.2 ± 17.3                        | 27.3 ± 6.0  | 25.8 ± 0.8  | -         | -       | 29.2 ± 4.2 | 1.99      | -       | 4.1 ± 3.6   | 14.19     | 6.65    |
| <b>41c</b>  | >100                               | >100        | >100        | -         | -       | >100       | -         | -       | >100        | -         | -       |
| <b>42a</b>  | 100                                | 100         | >100        | -         | -       | >100       | -         | -       | 7.0 ± 5.2   | 14.29     | 14.29   |
| <b>42b</b>  | 67.3 ± 12.7                        | 47.0 ± 3.3  | 100         | -         | -       | 100        | -         | -       | 11.9 ± 3.6  | 5.66      | 3.95    |
| <b>42c</b>  | 100                                | 32.8 ± 4.1  | >100        | -         | -       | >100       | -         | -       | 24.9 ± 4.6  | 4.0       | 1.32    |
| <b>43a</b>  | 100                                | 33.0 ± 20.3 | >100        | -         | -       | >100       | -         | -       | 28.6 ± 3.9  | 3.5       | -       |
| <b>43b</b>  | 100                                | >100        | >100        | -         | -       | >100       | -         | -       | 43.3 ± 4.4  | 2.3       | 2.3     |
| <b>43c</b>  | 63.4 ± 8.9                         | 30.9 ± 8.7  | >100        | -         | -       | >100       | -         | -       | 17.7 ± 6.1  | 3.58      | 1.75    |
| <b>44a</b>  | 100                                | 73.3 ± 3.2  | 100         | -         | -       | >100       | -         | -       | 89.2 ± 20.6 | 1.2       | -       |
| <b>44b</b>  | >100                               | 45.1 ± 20.9 | >100        | -         | -       | >100       | -         | -       | 65.6 ± 17.3 | 1.52      | -       |
| <b>44c</b>  | 100                                | >100        | >100        | -         | -       | >100       | -         | -       | 100         | -         | -       |
| <b>45a</b>  | 100                                | 55.6 ± 13.4 | >100        | -         | -       | 100        | -         | -       | 4.8 ± 3.6   | 20.83     | 11.58   |
| <b>45b</b>  | 46.1 ± 14.8                        | 82.1 ± 0.4  | >100        | -         | -       | 100        | -         | -       | 5.5 ± 4.0   | 8.36      | 14.9    |
| <b>45c</b>  | 68.5 ± 22.7                        | >100        | >100        | -         | -       | >100       | -         | -       | 4.1 ± 3.3   | 16.7      | 24.39   |
| <b>46a</b>  | 100                                | 100         | >100        | -         | -       | >100       | -         | -       | 63.0 ± 15.1 | 1.59      | 1.59    |
| <b>46c</b>  | >100                               | >100        | >100        | -         | -       | >100       | -         | -       | 5.1 ± 4.2   | 19.6      | 19.6    |
| <b>47a</b>  | 100                                | >100        | >100        | -         | -       | >100       | -         | -       | 100         | -         | -       |
| <b>47b</b>  | >100                               | 100         | >100        | -         | -       | >100       | -         | -       | 100         | -         | -       |
| <b>48a</b>  | 100                                | >100        | >100        | -         | -       | >100       | -         | -       | 100         | -         | -       |
| <b>48b</b>  | >100                               | 100         | >100        | -         | -       | >100       | -         | -       | 100         | -         | -       |
| <b>48c</b>  | >100                               | 100         | >100        | -         | -       | >100       | -         | -       | 69.6 ± 25.9 | 1.44      | 1.44    |
| <b>49a</b>  | 100                                | 80.4 ± 9.9  | 100         | -         | -       | >100       | -         | -       | 100         | -         | -       |
| <b>49b</b>  | 82.9 ± 6.6                         | 64.8 ± 9.2  | 100         | -         | -       | >100       | -         | -       | 100         | -         | -       |
| <b>49c</b>  | >100                               | >100        | 100         | -         | -       | >100       | -         | -       | 100         | -         | -       |
| <b>5-FU</b> | 55.0 ± 8.7                         | 74.0 ± 3.1  | 8.2 ± 1.9   | 6.7       | 9.02    | 5.9 ± 0.7  | 9.32      | 7.94    | >100        | -         | -       |

<sup>1</sup> IC<sub>50</sub> – Compound concentration that inhibited cell growth by 50 %. Data represents mean IC<sub>50</sub> (μM) values ± standard deviation (SD) of three independent experiments. Exponentially growing cells were treated with compounds during 72 hrs. Cytotoxicity was analysed using MTT survival assay. **5-FU**: 5-Fluorouracil. SI = IC<sub>50</sub> normal cell line (MDCK1 or BJ)/IC<sub>50</sub> for respective cancerous cell line.

**Table S3.** Additional antiproliferative testing of selected compounds with calculated selectivity index.

| Cpd | IC <sub>50</sub> (μM) <sup>1</sup> |             |             |           |         |             |           |         |             |           |         |            |           |         |
|-----|------------------------------------|-------------|-------------|-----------|---------|-------------|-----------|---------|-------------|-----------|---------|------------|-----------|---------|
|     | MDCK1                              | BJ          | SW620       | SI (MDCK) | SI (BJ) | MDA-MB-231  | SI (MDCK) | SI (BJ) | HL60        | SI (MDCK) | SI (BJ) | THP1       | SI (MDCK) | SI (BJ) |
| 36a | 2.7 ± 0.3                          | 3.2 ± 0.3   | 5.6 ± 1.2   | -         | -       | 33.0 ± 4.9  | -         | -       | 18.8 ± 1.1  | -         | -       | 20.4 ± 3.3 | -         | -       |
| 36c | 100                                | >100        | 100         | -         | -       | >100        | -         | -       | 100         | -         | -       | >100       | -         | -       |
| 38b | 26.6 ± 3.1                         | 32.2 ± 2.8  | 30.5 ± 9.2  | -         | -       | 42.4 ± 7.2  | -         | -       | 15.8 ± 2.3  | 1.68      | 2.04    | 14.7 ± 4.1 | 1.8       | 2.19    |
| 39c | 100                                | 38.1 ± 1.4  | 34.2 ± 7.1  | 2.92      | -       | 38.5 ± 1.6  | 2.6       | -       | 31.1 ± 3.0  | 3.22      | -       | 69.7 ± 6.3 | 1.43      | -       |
| 42a | 100                                | 100         | 100         | -         | -       | 76.3 ± 11.8 | 1.31      | 1.31    | 33.2 ± 1.8  | 3.01      | 3.01    | 44.5 ± 5.3 | 2.25      | 2.25    |
| 42b | 67.3 ± 12.7                        | 47.0 ± 3.3  | 92.7 ± 34.3 | -         | -       | 84.5 ± 18.3 | -         | -       | 44.4 ± 12.6 | 1.51      | -       | 100        | -         | -       |
| 42c | 100                                | 32.8 ± 4.1  | 29.8 ± 3.0  | 3.36      | -       | 38.9 ± 4.2  | 2.57      | -       | 19.5 ± 0.8  | 5.13      | 1.68    | 19.7 ± 2.4 | 5.13      | 1.68    |
| 43a | 100                                | 33.0 ± 20.3 | >100        | -         | -       | 100         | -         | -       | 40.4 ± 12.0 | 2.48      | -       | 29.7 ± 8.6 | 3.37      | -       |
| 45a | 100                                | 55.6 ± 13.4 | >100        | -         | -       | 100         | -         | -       | 48.1 ± 16.4 | 2.07      | 1.15    | 0.8 ± 0.1  | 125       | 69,5    |
| 45b | 46.1 ± 14.8                        | 82.1 ± 0.4  | 100         | -         | -       | 100         | -         | -       | 30.0 ± 12.3 | 1.54      | 2.74    | 2.5 ± 1.5  | 18.44     | 32.84   |
| 45c | 68.5 ± 22.7                        | >100        | 100         | -         | -       | 100         | -         | -       | 25.1 ± 16.0 | 2.73      | 4.0     | >100       | -         | -       |
| 46c | >100                               | >100        | >100        | -         | -       | >100        | -         | -       | 50.7 ± 20.5 | 1.97      | 1.97    | 100        | -         | -       |

<sup>1</sup> IC<sub>50</sub> – Compound concentration that inhibited cell growth by 50 %. Data represents mean IC<sub>50</sub> (μM) values ± standard deviation (SD) of three independent experiments. Exponentially growing cells were treated with compounds during 72 hrs. Cytotoxicity was analysed using MTT survival assay. **5-FU**: 5-Fluorouracil. SI = IC<sub>50</sub> normal cell line (MDCK1 or BJ)/ IC<sub>50</sub> for respective cancerous cell line.



**Table S4.** Experimental and calculated  $\log IC_{50}$  by Eqs. (1 and 1a), as well as values of descriptors included in QSAR model (Eq. 1 and 1a) antiproliferative activity against MDCK-1 cells.

| Code | Status     | Exp. endpoint | Pred. eq.(1) | Pred. eq.(1a) | <i>SIC1</i> | <i>GATS4p</i> | <i>BEHv6</i> | <i>BELp1</i> | <i>R7m</i> |
|------|------------|---------------|--------------|---------------|-------------|---------------|--------------|--------------|------------|
| 15a  | Training   | 2.00          | 1.96         | 1.96          | 0.577       | 1.241         | 2.725        | 1.954        | 0.199      |
| 15b  | Training   | 2.00          | 2.00         | 1.97          | 0.624       | 1.201         | 2.725        | 1.955        | 0.249      |
| 15c  | Training   | 1.89          | 1.87         | 1.83          | 0.61        | 1.216         | 2.844        | 1.963        | 0.245      |
| 16a  | Training   | 1.91          | 1.31         | 1.29          | 0.577       | 1.498         | 2.715        | 1.955        | 0.182      |
| 16b  | Training   | 1.41          | 1.57         | 1.53          | 0.605       | 1.421         | 2.715        | 1.955        | 0.232      |
| 16c  | Training   | 0.83          | 1.34         | 1.29          | 0.61        | 1.421         | 2.842        | 1.964        | 0.232      |
| 17a  | Prediction | 2.00          | 2.10         | 2.12          | 0.529       | 1.271         | 2.713        | 1.955        | 0.162      |
| 17b  | Training   | 2.00          | 2.11         | 2.10          | 0.577       | 1.238         | 2.713        | 1.955        | 0.214      |
| 17c  | Prediction | 1.89          | 1.99         | 1.96          | 0.569       | 1.25          | 2.842        | 1.964        | 0.219      |
| 18a  | Training   | 1.25          | 1.40         | 1.41          | 0.609       | 1.194         | 2.724        | 1.957        | 0.126      |
| 18b  | Prediction | 1.47          | 1.37         | 1.36          | 0.659       | 1.177         | 2.724        | 1.958        | 0.179      |
| 18c  | Training   | 1.62          | 1.40         | 1.37          | 0.639       | 1.187         | 2.843        | 1.967        | 0.187      |
| 19a  | Training   | 0.04          | 0.62         | 0.61          | 0.609       | 1.516         | 2.714        | 1.958        | 0.112      |
| 19b  | Training   | 1.21          | 0.90         | 0.88          | 0.638       | 1.436         | 2.714        | 1.958        | 0.166      |
| 19c  | Training   | 0.04          | 0.78         | 0.74          | 0.639       | 1.43          | 2.842        | 1.967        | 0.176      |
| 20a  | Prediction | 1.82          | 1.61         | 1.65          | 0.559       | 1.218         | 2.713        | 1.958        | 0.097      |
| 20b  | Training   | 1.97          | 1.55         | 1.56          | 0.609       | 1.214         | 2.713        | 1.958        | 0.151      |
| 20c  | Training   | 1.93          | 1.54         | 1.53          | 0.595       | 1.22          | 2.842        | 1.967        | 0.164      |
| 21a  | Training   | 1.10          | 1.08         | 1.08          | 0.736       | 0.795         | 2.724        | 1.939        | 0.139      |
| 21b  | Training   | 1.00          | 0.90         | 0.85          | 0.785       | 0.907         | 2.724        | 1.94         | 0.212      |
| 21c  | Training   | 1.64          | 1.35         | 1.32          | 0.745       | 0.887         | 2.758        | 1.953        | 0.208      |
| 22a  | Training   | 0.04          | 0.13         | 0.10          | 0.736       | 1.199         | 2.713        | 1.941        | 0.124      |
| 22b  | Training   | 0.00          | 0.35         | 0.29          | 0.762       | 1.217         | 2.713        | 1.942        | 0.198      |
| 22c  | Prediction | -0.15         | 0.62         | 0.57          | 0.745       | 1.189         | 2.754        | 1.954        | 0.197      |
| 23a  | Training   | 1.61          | 1.36         | 1.38          | 0.685       | 0.8           | 2.711        | 1.941        | 0.108      |
| 23b  | Training   | 1.44          | 1.11         | 1.09          | 0.736       | 0.935         | 2.711        | 1.942        | 0.182      |
| 23c  | Training   | 1.47          | 1.53         | 1.52          | 0.703       | 0.909         | 2.753        | 1.954        | 0.185      |
| 24a  | Prediction | 1.06          | 1.39         | 1.37          | 0.62        | 0.968         | 2.948        | 1.952        | 0.159      |
| 24b  | Training   | 0.94          | 1.39         | 1.33          | 0.659       | 1.023         | 2.948        | 1.952        | 0.23       |
| 24c  | Prediction | 1.61          | 1.55         | 1.50          | 0.638       | 1.027         | 2.948        | 1.956        | 0.22       |
| 25a  | Prediction | 0.91          | 0.57         | 0.52          | 0.62        | 1.287         | 2.946        | 1.952        | 0.143      |

|            |            |      |      |      |       |       |       |       |       |
|------------|------------|------|------|------|-------|-------|-------|-------|-------|
| <b>25b</b> | Training   | 1.71 | 0.89 | -    | 0.643 | 1.275 | 2.946 | 1.952 | 0.221 |
| <b>25c</b> | Training   | 1.36 | 0.96 | 0.90 | 0.638 | 1.273 | 2.947 | 1.957 | 0.213 |
| <b>26a</b> | Training   | 1.56 | 1.49 | 1.49 | 0.581 | 0.978 | 2.946 | 1.952 | 0.127 |
| <b>26b</b> | Training   | 1.81 | 1.50 | 1.46 | 0.62  | 1.047 | 2.946 | 1.952 | 0.205 |
| <b>26c</b> | Training   | 0.93 | 1.72 | 1.69 | 0.603 | 1.049 | 2.947 | 1.957 | 0.208 |
| <b>34a</b> | Training   | 0.45 | 0.76 | 0.71 | 0.609 | 1.221 | 3.085 | 1.968 | 0.154 |
| <b>34b</b> | Training   | 0.34 | 0.77 | 0.71 | 0.644 | 1.201 | 3.085 | 1.969 | 0.192 |
| <b>34c</b> | Prediction | 0.32 | 0.93 | 0.87 | 0.622 | 1.218 | 3.091 | 1.972 | 0.19  |
| <b>35a</b> | Training   | 0.43 | 0.82 | 0.81 | 0.637 | 1.178 | 2.934 | 1.969 | 0.121 |
| <b>35c</b> | Training   | 0.88 | 1.11 | 1.08 | 0.646 | 1.191 | 2.935 | 1.974 | 0.172 |
| <b>36a</b> | Training   | 1.50 | 1.19 | 1.21 | 0.717 | 0.869 | 2.766 | 1.967 | 0.109 |
| <b>36b</b> | Prediction | 1.40 | 1.26 | 1.23 | 0.753 | 0.955 | 2.766 | 1.967 | 0.198 |
| <b>36c</b> | Training   | 2.00 | 1.51 | 1.48 | 0.715 | 0.946 | 2.844 | 1.969 | 0.213 |
| <b>37a</b> | Prediction | 0.18 | 0.75 | 0.71 | 0.636 | 1.016 | 3.127 | 1.967 | 0.132 |
| <b>37b</b> | Training   | 0.38 | 0.70 | 0.63 | 0.666 | 1.058 | 3.128 | 1.967 | 0.179 |
| <b>37c</b> | Prediction | 0.41 | 0.91 | 0.85 | 0.643 | 1.067 | 3.134 | 1.97  | 0.181 |
| <b>38a</b> | Training   | 1.43 | 1.56 | 1.54 | 0.609 | 1.229 | 3.113 | 2.02  | 0.173 |
| <b>38b</b> | Training   | 1.42 | 1.46 | 1.43 | 0.641 | 1.208 | 3.113 | 2.02  | 0.191 |
| <b>39c</b> | Training   | 2.00 | 1.88 | 1.88 | 0.64  | 1.199 | 2.946 | 2.021 | 0.183 |
| <b>40a</b> | Training   | 1.77 | 2.02 | 2.07 | 0.707 | 0.873 | 2.826 | 2.02  | 0.128 |
| <b>40b</b> | Training   | 2.00 | 1.98 | 1.99 | 0.74  | 0.959 | 2.826 | 2.02  | 0.196 |
| <b>40c</b> | Training   | 2.00 | 2.28 | 2.29 | 0.703 | 0.951 | 2.861 | 2.021 | 0.205 |
| <b>41a</b> | Prediction | 1.76 | 1.46 | 1.46 | 0.632 | 1.021 | 3.169 | 2.02  | 0.134 |
| <b>41c</b> | Training   | 2.00 | 1.64 | 1.62 | 0.638 | 1.073 | 3.175 | 2.021 | 0.19  |
| <b>42a</b> | Training   | 2.00 | 1.58 | 1.57 | 0.609 | 1.328 | 3.111 | 2.039 | 0.166 |
| <b>42b</b> | Training   | 1.83 | 1.54 | 1.50 | 0.641 | 1.323 | 3.112 | 2.039 | 0.199 |
| <b>42c</b> | Training   | 2.00 | 1.69 | 1.66 | 0.618 | 1.359 | 3.115 | 2.04  | 0.205 |
| <b>43a</b> | Prediction | 2.00 | 1.67 | 1.70 | 0.633 | 1.256 | 2.946 | 2.039 | 0.118 |
| <b>43b</b> | Training   | 2.00 | 1.52 | 1.53 | 0.666 | 1.291 | 2.946 | 2.039 | 0.151 |
| <b>43c</b> | Training   | 1.80 | 1.95 | 1.94 | 0.64  | 1.327 | 2.946 | 2.04  | 0.195 |
| <b>44a</b> | Training   | 2.00 | 2.34 | 2.41 | 0.703 | 0.854 | 2.826 | 2.039 | 0.123 |
| <b>44b</b> | Training   | 2.00 | 2.15 | 2.17 | 0.735 | 1.025 | 2.826 | 2.039 | 0.196 |
| <b>44c</b> | Training   | 2.00 | 2.39 | 2.41 | 0.699 | 1.022 | 2.861 | 2.04  | 0.198 |
| <b>45a</b> | Training   | 2.00 | 1.77 | 1.78 | 0.632 | 1.043 | 3.166 | 2.039 | 0.145 |

|            |            |      |      |      |       |       |       |       |       |
|------------|------------|------|------|------|-------|-------|-------|-------|-------|
| <b>45b</b> | Training   | 1.66 | 1.52 | 1.50 | 0.66  | 1.131 | 3.166 | 2.039 | 0.173 |
| <b>45c</b> | Training   | 1.84 | 1.71 | 1.69 | 0.637 | 1.152 | 3.172 | 2.04  | 0.181 |
| <b>46a</b> | Training   | 2.00 | 2.25 | 2.26 | 0.642 | 0.899 | 3.167 | 2.039 | 0.183 |
| <b>46c</b> | Training   | 2.00 | 2.09 | 2.07 | 0.637 | 1.023 | 3.173 | 2.04  | 0.195 |
| <b>47a</b> | Prediction | 2.00 | 1.77 | 1.77 | 0.639 | 1.18  | 3.047 | 2.039 | 0.155 |
| <b>47b</b> | Prediction | 2.00 | 1.92 | 1.89 | 0.664 | 1.232 | 3.047 | 2.039 | 0.231 |
| <b>48a</b> | Training   | 2.00 | 1.97 | 1.99 | 0.618 | 1.122 | 3.038 | 2.039 | 0.135 |
| <b>48b</b> | Training   | 2.00 | 1.98 | 1.97 | 0.642 | 1.201 | 3.038 | 2.04  | 0.194 |
| <b>48c</b> | Training   | 2.00 | 2.23 | 2.23 | 0.614 | 1.211 | 3.039 | 2.04  | 0.202 |
| <b>49a</b> | Training   | 2.00 | 1.90 | 1.94 | 0.601 | 1.222 | 2.984 | 2.039 | 0.117 |
| <b>49b</b> | Training   | 1.92 | 1.84 | 1.85 | 0.625 | 1.259 | 2.984 | 2.039 | 0.151 |
| <b>49c</b> | Training   | 2.00 | 2.17 | 2.18 | 0.597 | 1.297 | 2.985 | 2.04  | 0.18  |

**Table S5.** Experimental and calculated  $\log IC_{50}$  by Eqs. (1 and 1a), as well as values of descriptors included in QSAR model (Eq. 2 and 2a) for antiproliferative activity on T-cell lymphoma (HuT78).

| Code | Status     | Exp.<br>endpoint | Pred.<br>eq.(2) | Pred.<br>eq.(2a) | <i>MATS8v</i> | <i>Mor30m</i> | <i>Mor09p</i> | <i>E2u</i> |
|------|------------|------------------|-----------------|------------------|---------------|---------------|---------------|------------|
| 15c  | Training   | 2                | 1.52            | 1.6              | -0.33         | 0.469         | -1.288        | 0.36       |
| 16b  | Training   | 1.84             | 1.47            | 1.45             | -0.289        | 0.087         | -1.498        | 0.484      |
| 18a  | Training   | 1.12             | 1.31            | 1.41             | -0.134        | 0.215         | -1.039        | 0.5        |
| 18b  | Training   | 2                | 1.63            | 1.65             | -0.255        | 0.21          | -1.075        | 0.512      |
| 18c  | Training   | 1.75             | 1.57            | 1.69             | -0.183        | 0.297         | -1.006        | 0.443      |
| 19b  | Prediction | 2                | 1.99            | 1.96             | -0.343        | 0.082         | -1.229        | 0.511      |
| 20c  | Training   | 1.81             | 1.82            | 1.93             | -0.209        | 0.154         | -1.123        | 0.44       |
| 21a  | Training   | 0.83             | 0.82            | 0.82             | -0.258        | 0.489         | -1.144        | 0.516      |
| 21b  | Training   | 0.56             | 0.83            | 0.77             | -0.329        | 0.517         | -1.226        | 0.525      |
| 21c  | Training   | 1.39             | 0.97            | 1.01             | -0.312        | 0.633         | -1.172        | 0.428      |
| 22a  | Training   | 1.17             | 1.45            | 1.37             | -0.407        | 0.347         | -1.29         | 0.513      |
| 22b  | Prediction | 0.96             | 1.52            | 1.4              | -0.461        | 0.331         | -1.352        | 0.524      |
| 22c  | Training   | 1.58             | 1.38            | 1.37             | -0.401        | 0.505         | -1.298        | 0.427      |
| 23a  | Training   | 1.28             | 1.2             | 1.16             | -0.331        | 0.374         | -1.243        | 0.514      |
| 23b  | Prediction | 1.23             | 1.33            | 1.24             | -0.407        | 0.371         | -1.307        | 0.521      |
| 23c  | Prediction | 1.3              | 1.35            | 1.35             | -0.369        | 0.515         | -1.245        | 0.425      |
| 24c  | Training   | 1.7              | 1.7             | 1.76             | -0.312        | 0.232         | -1.5          | 0.36       |
| 25b  | Training   | 1.29             | 0.58            | -                | -0.374        | 0.478         | -1.667        | 0.47       |
| 26c  | Training   | 1.37             | 1.13            | 1.17             | -0.344        | 0.548         | -1.473        | 0.348      |
| 34a  | Training   | 0.34             | 0.08            | 0.08             | -0.142        | 0.414         | -1.473        | 0.515      |
| 34b  | Prediction | 0.34             | 0.11            | 0.05             | -0.254        | 0.434         | -1.771        | 0.47       |
| 34c  | Training   | 0.26             | 0.2             | 0.26             | -0.195        | 0.533         | -1.681        | 0.376      |
| 35a  | Training   | 0.15             | 0.5             | 0.49             | -0.203        | 0.368         | -1.466        | 0.495      |
| 35c  | Training   | 0.79             | 0.95            | 1.04             | -0.22         | 0.424         | -1.42         | 0.383      |
| 36a  | Training   | 0.64             | 0.76            | 0.7              | -0.301        | 0.364         | -1.502        | 0.5        |
| 36b  | Training   | 0.26             | 0.62            | 0.53             | -0.338        | 0.472         | -1.488        | 0.506      |
| 36c  | Training   | 0.2              | 0.76            | 0.75             | -0.329        | 0.534         | -1.518        | 0.415      |
| 37a  | Prediction | 0.2              | 0.51            | 0.43             | -0.281        | 0.262         | -1.836        | 0.473      |
| 37b  | Training   | 0.32             | 0.3             | 0.19             | -0.333        | 0.383         | -1.892        | 0.472      |
| 37c  | Training   | 0.48             | 0.71            | 0.72             | -0.33         | 0.56          | -1.647        | 0.362      |
| 38a  | Training   | 1.21             | 0.92            | 0.98             | -0.154        | 0.23          | -1.331        | 0.486      |
| 38b  | Training   | 0.6              | 0.73            | 0.75             | -0.254        | 0.483         | -1.41         | 0.435      |
| 39c  | Training   | 1.1              | 1.77            | -                | -0.227        | 0.41          | -0.9          | 0.404      |
| 40a  | Training   | 2                | 2.08            | 2.09             | -0.304        | 0.067         | -1.11         | 0.513      |
| 40b  | Training   | 1.57             | 1.86            | 1.84             | -0.332        | 0.151         | -1.188        | 0.509      |
| 40c  | Training   | 2                | 1.93            | 1.99             | -0.327        | 0.313         | -1.097        | 0.427      |
| 41a  | Prediction | 0.61             | 0.77            | 0.75             | -0.286        | 0.412         | -1.494        | 0.459      |
| 42a  | Training   | 0.85             | 0.86            | 0.87             | -0.183        | 0.14          | -1.553        | 0.49       |
| 42b  | Training   | 1.08             | 1.39            | 1.37             | -0.29         | -0.003        | -1.817        | 0.43       |

|            |            |      |      |      |        |        |        |       |
|------------|------------|------|------|------|--------|--------|--------|-------|
| <b>42c</b> | Prediction | 1.4  | 1.91 | 2.01 | -0.225 | -0.004 | -1.517 | 0.371 |
| <b>43a</b> | Training   | 1.46 | 1.36 | 1.37 | -0.26  | 0.092  | -1.558 | 0.458 |
| <b>43b</b> | Prediction | 1.64 | 1.77 | 1.73 | -0.332 | -0.048 | -1.644 | 0.467 |
| <b>43c</b> | Training   | 1.25 | 1.2  | 1.23 | -0.259 | 0.184  | -1.655 | 0.405 |
| <b>44a</b> | Training   | 1.95 | 2.03 | 1.99 | -0.364 | -0.049 | -1.567 | 0.462 |
| <b>44b</b> | Training   | 1.82 | 1.72 | 1.66 | -0.387 | 0.069  | -1.61  | 0.468 |
| <b>44c</b> | Training   | 2    | 1.71 | 1.7  | -0.374 | 0.149  | -1.628 | 0.405 |
| <b>45a</b> | Training   | 0.68 | 0.79 | 0.71 | -0.327 | 0.115  | -2.131 | 0.413 |
| <b>45b</b> | Training   | 0.74 | 0.78 | 0.66 | -0.372 | 0.152  | -2.114 | 0.437 |
| <b>45c</b> | Training   | 0.61 | 1.03 | 0.98 | -0.367 | 0.271  | -1.871 | 0.397 |
| <b>46a</b> | Training   | 1.8  | 1.4  | 1.43 | -0.218 | 0.077  | -1.44  | 0.47  |
| <b>46c</b> | Prediction | 0.71 | 1.12 | 1.02 | -0.286 | -0.027 | -1.769 | 0.527 |
| <b>47a</b> | Training   | 2    | 2.08 | 2.13 | -0.261 | 0.051  | -1.082 | 0.497 |
| <b>47b</b> | Prediction | 2    | 2.69 | -    | -0.363 | -0.032 | -1.096 | 0.478 |
| <b>48a</b> | Training   | 2    | 1.92 | 1.97 | -0.271 | 0.071  | -1.299 | 0.447 |
| <b>48b</b> | Training   | 2    | 1.8  | 1.76 | -0.372 | 0.154  | -1.4   | 0.471 |
| <b>48c</b> | Prediction | 1.84 | 2.24 | 2.29 | -0.292 | 0.071  | -1.092 | 0.47  |
| <b>49a</b> | Training   | 2    | 2.22 | 2.32 | -0.24  | 0.03   | -1.124 | 0.442 |
| <b>49b</b> | Training   | 2    | 2.18 | 2.18 | -0.354 | 0.051  | -1.312 | 0.459 |
| <b>49c</b> | Training   | 2    | 1.83 | 1.85 | -0.277 | 0.104  | -1.229 | 0.483 |

**Fig. S1** a)  $^1\text{H}$  NMR and b)  $^{13}\text{C}$  NMR of compd. **9a**

a)

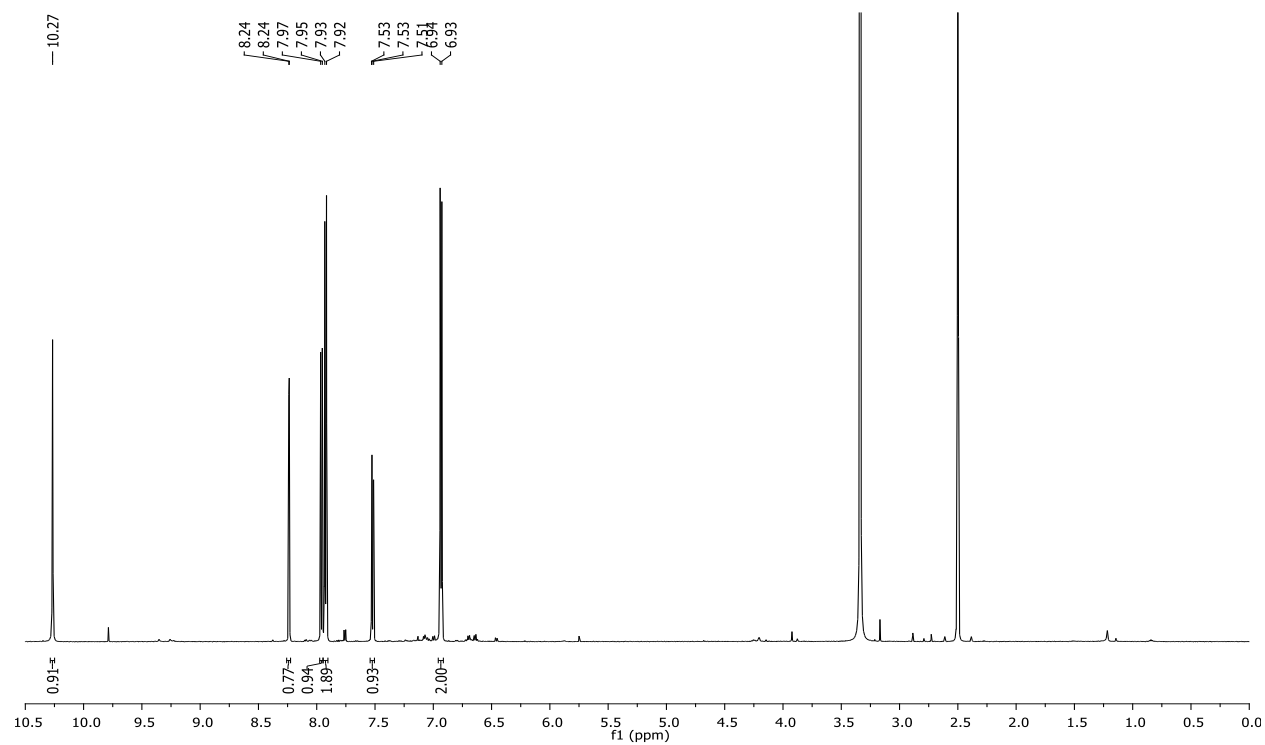

b)

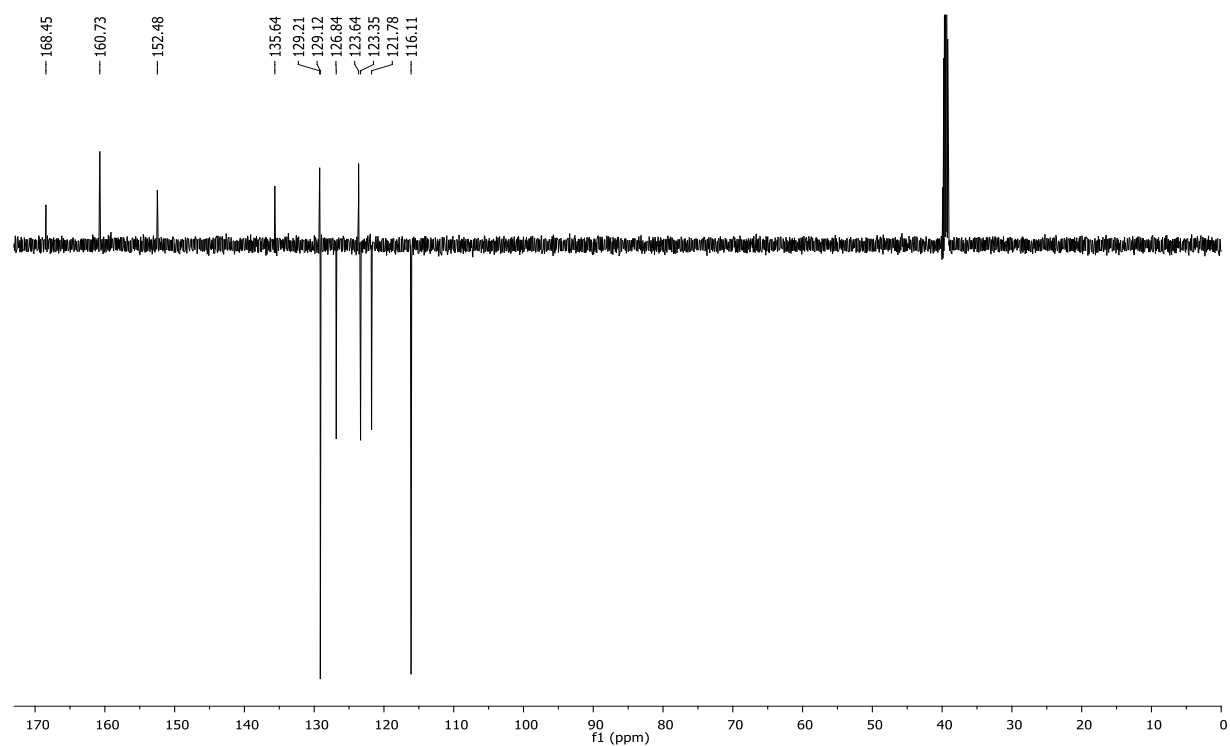

**Fig. S2** a)  $^1\text{H}$  NMR and b)  $^{13}\text{C}$  NMR of compd. **9b**

a)

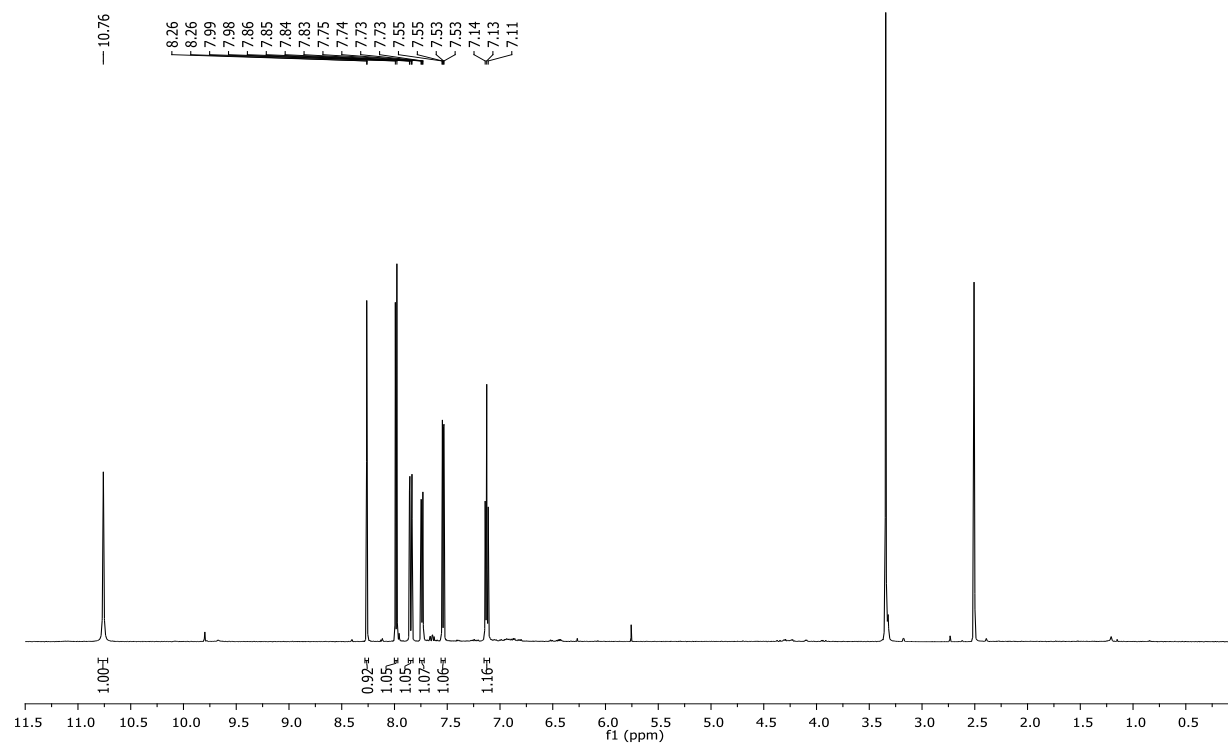

b)

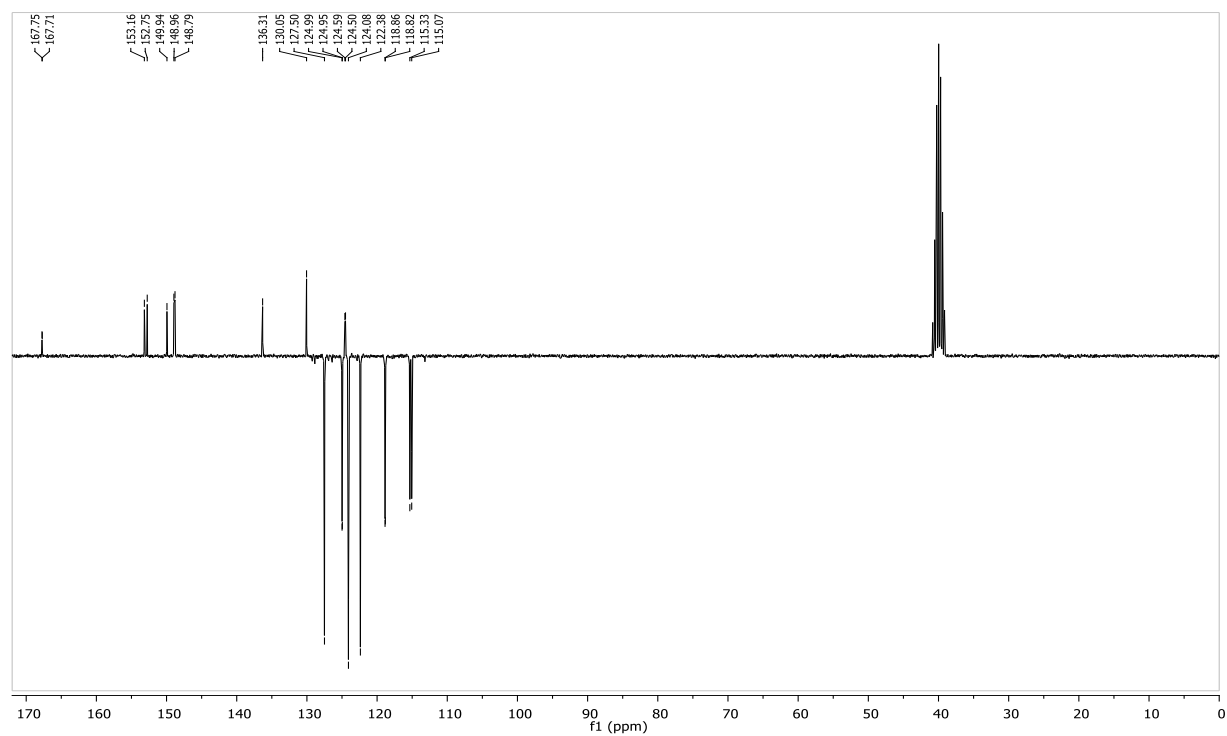

**Fig. S3** a)  $^1\text{H}$  NMR and b)  $^{13}\text{C}$  NMR of compd. **9c**

a)

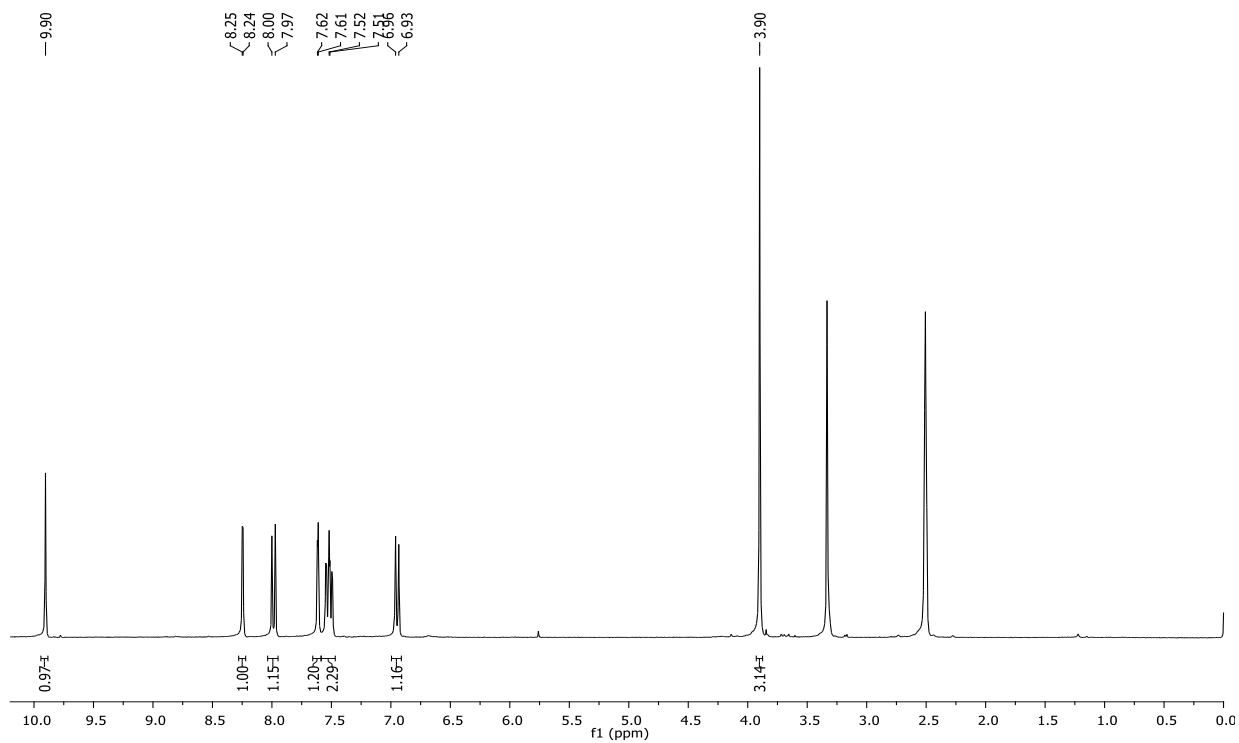

b)

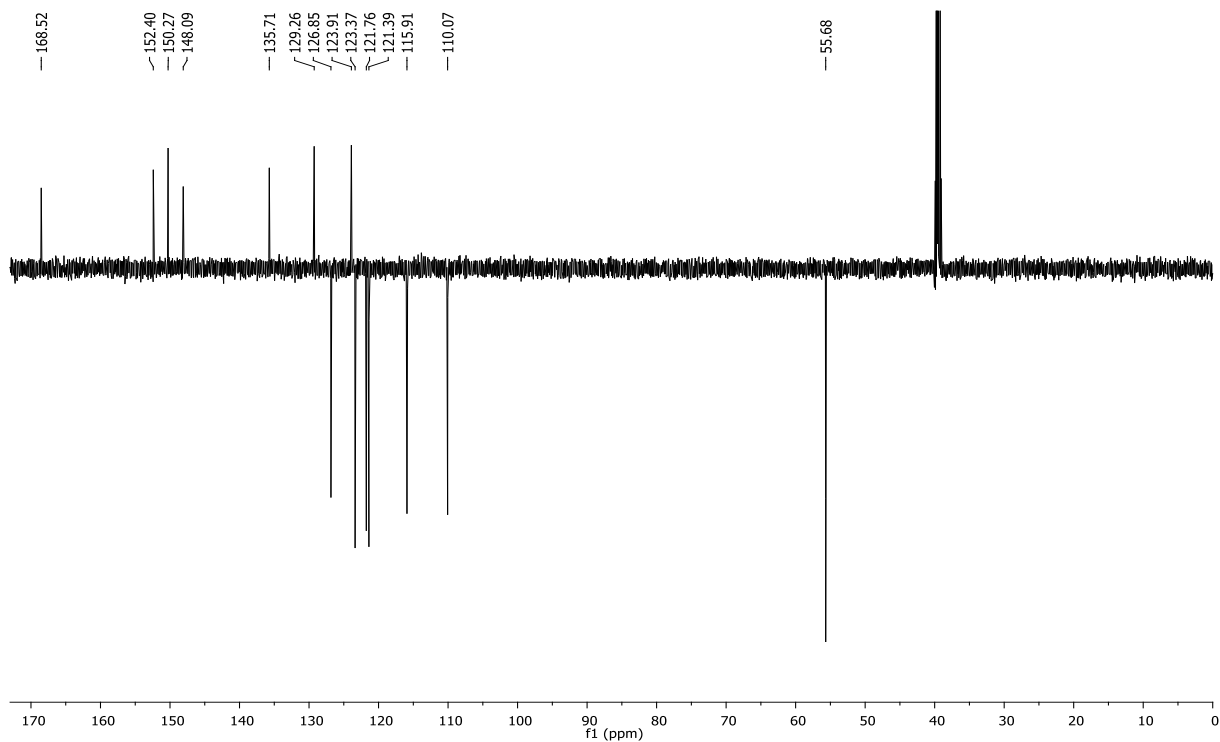



**Fig. S4** a)  $^1\text{H}$  NMR and b)  $^{13}\text{C}$  NMR of compd. **10a**

a)

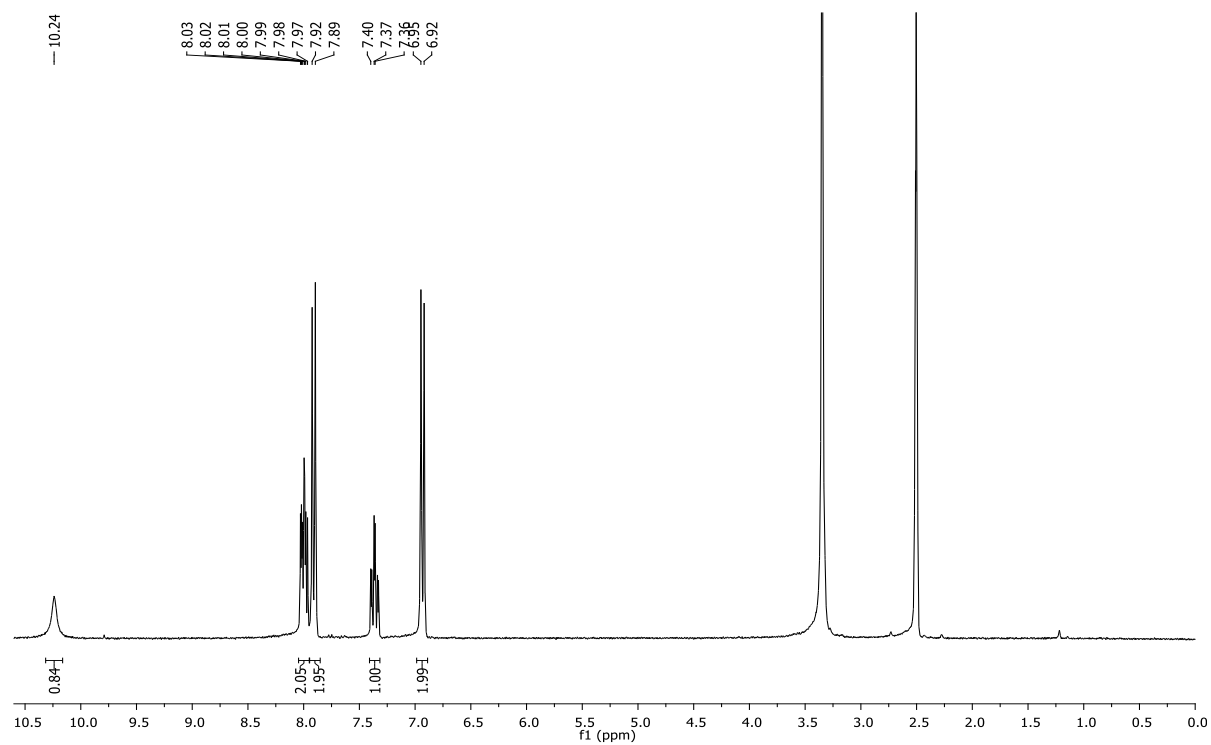

b)

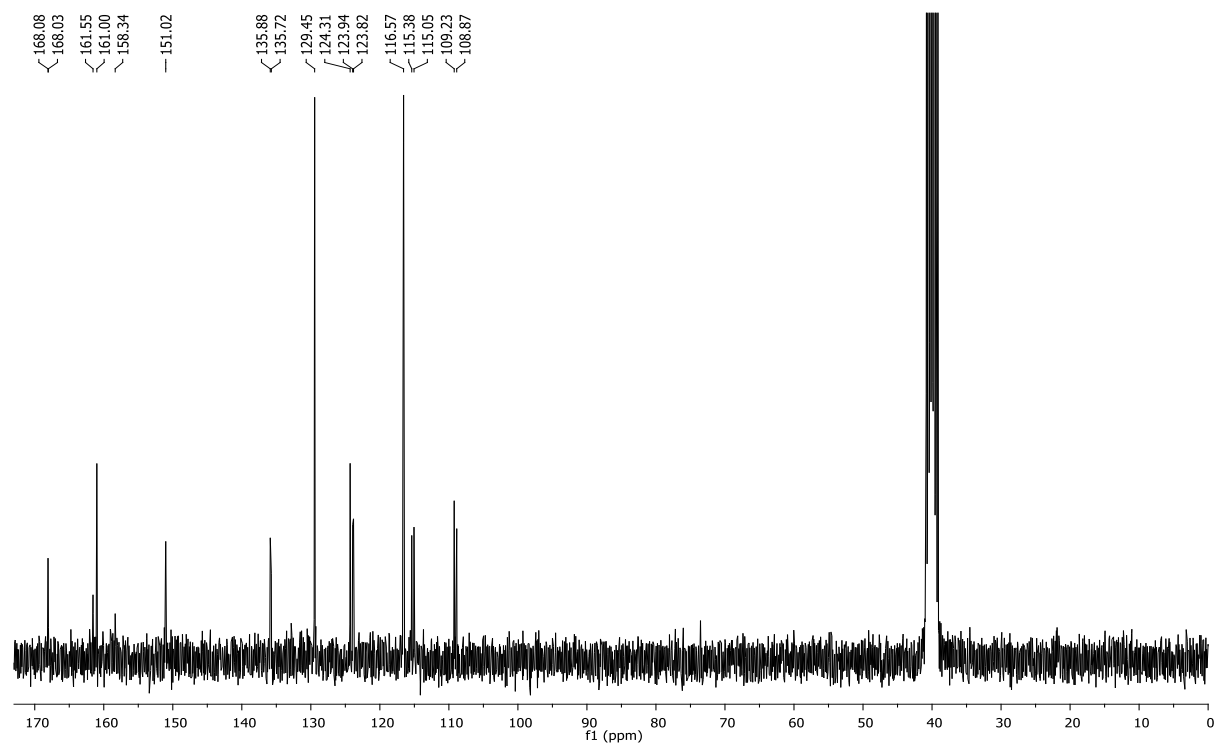

**Fig. S5** a)  $^1\text{H}$  NMR and b)  $^{13}\text{C}$  NMR of compd. **10b**

a)

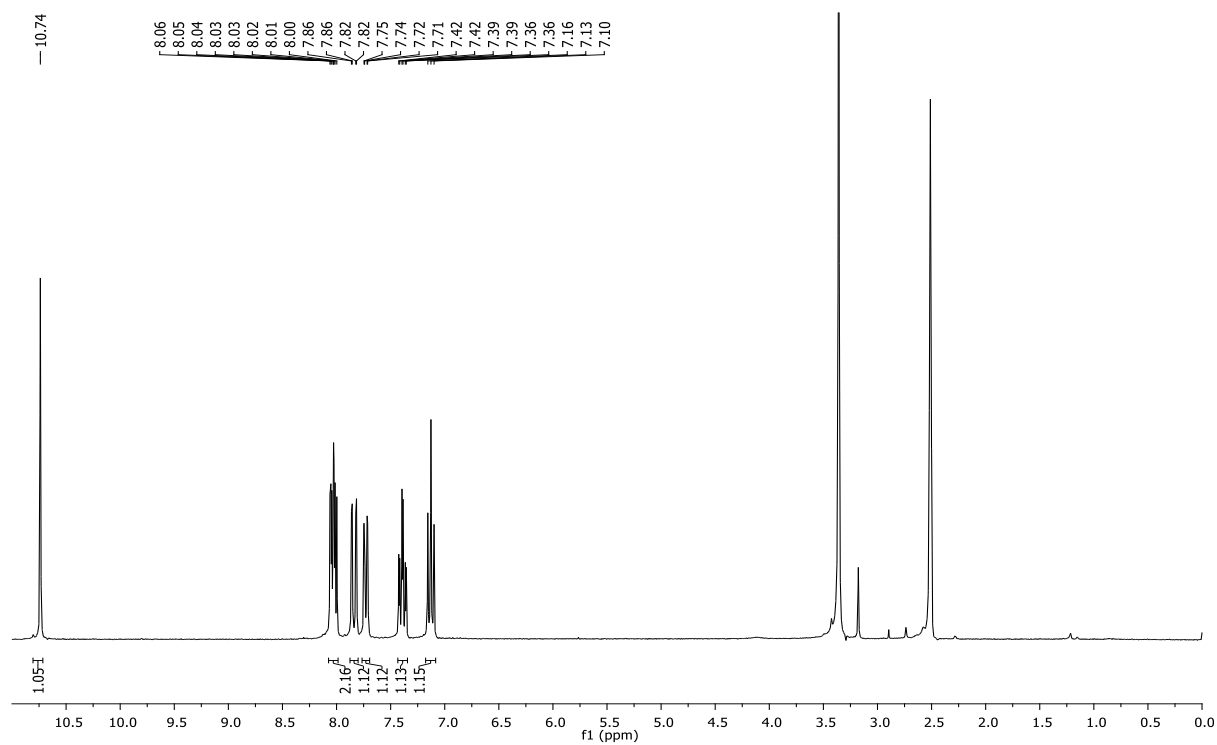

b)

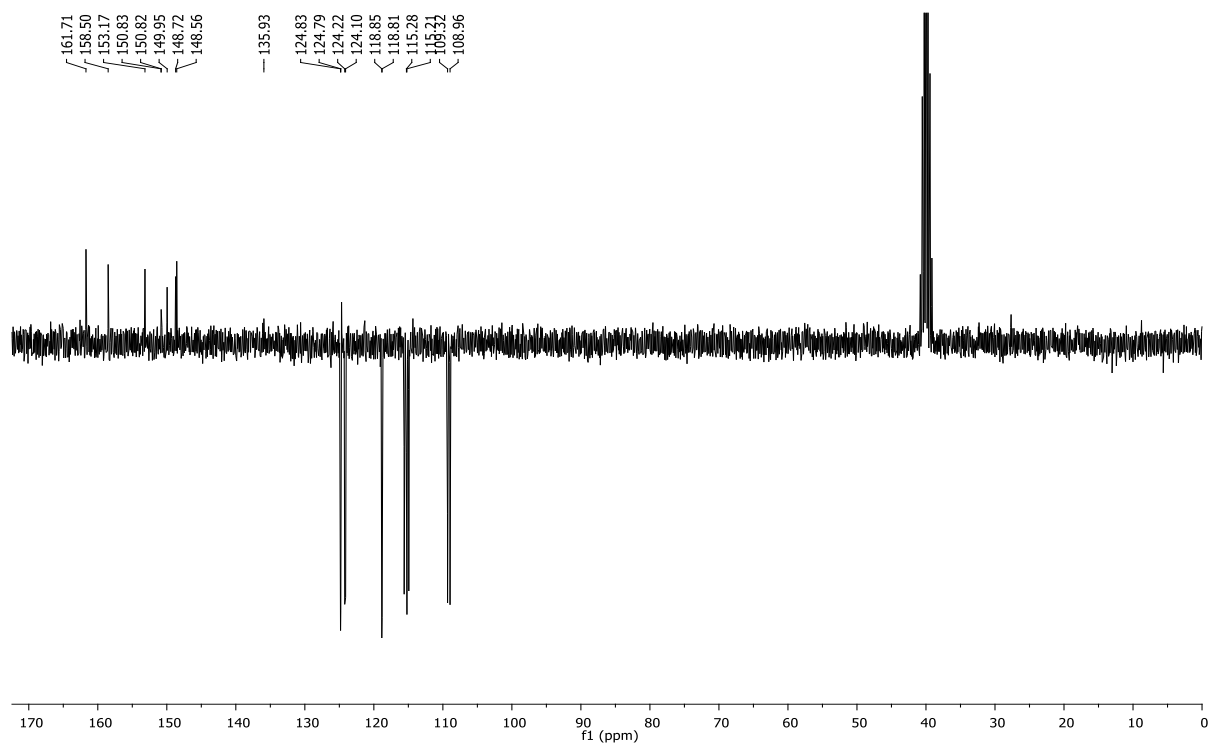

**Fig. S6** a)  $^1\text{H}$  NMR and b)  $^{13}\text{C}$  NMR of compd. **10c**

a)

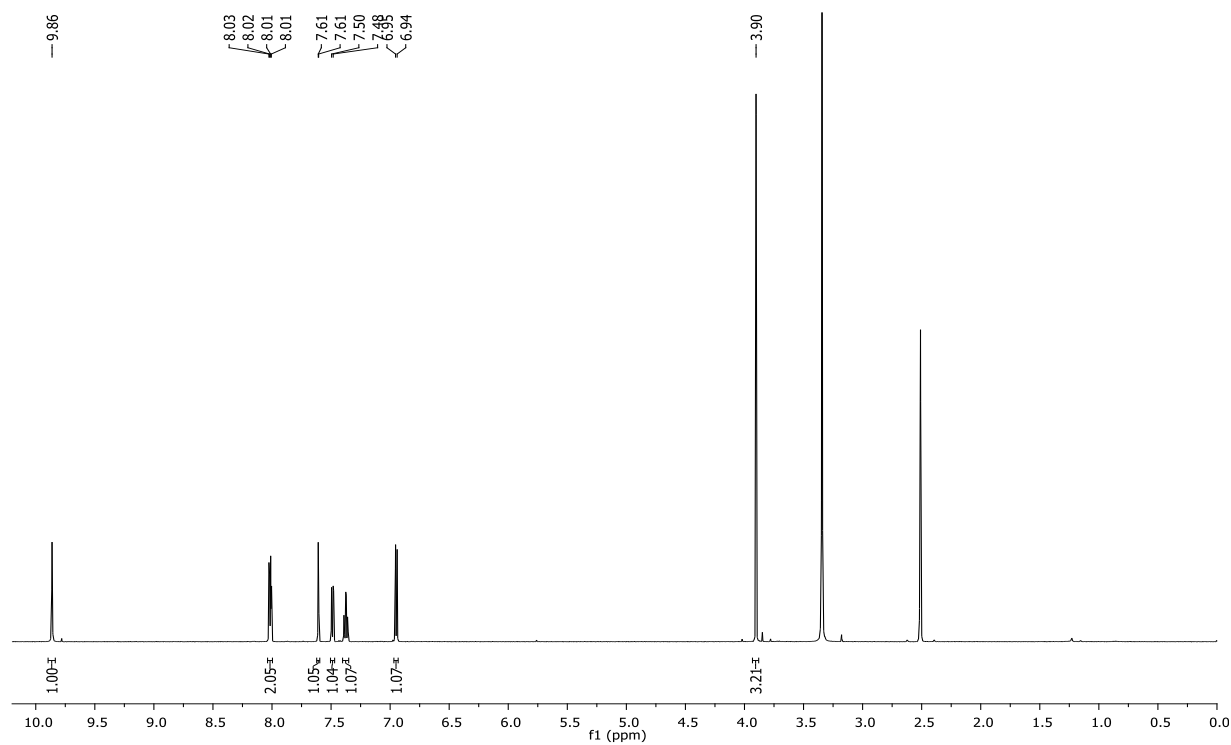

b)

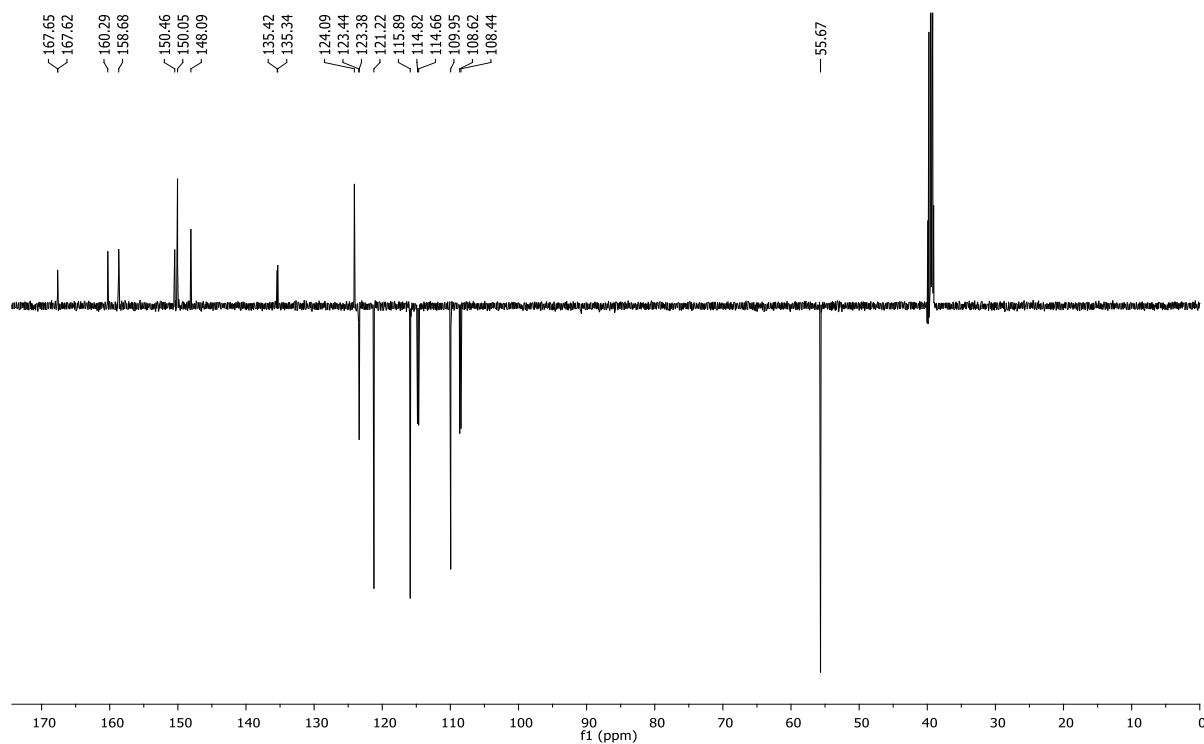

**Fig. S7** a)  $^1\text{H}$  NMR and b)  $^{13}\text{C}$  NMR of compd. **11a**

a)

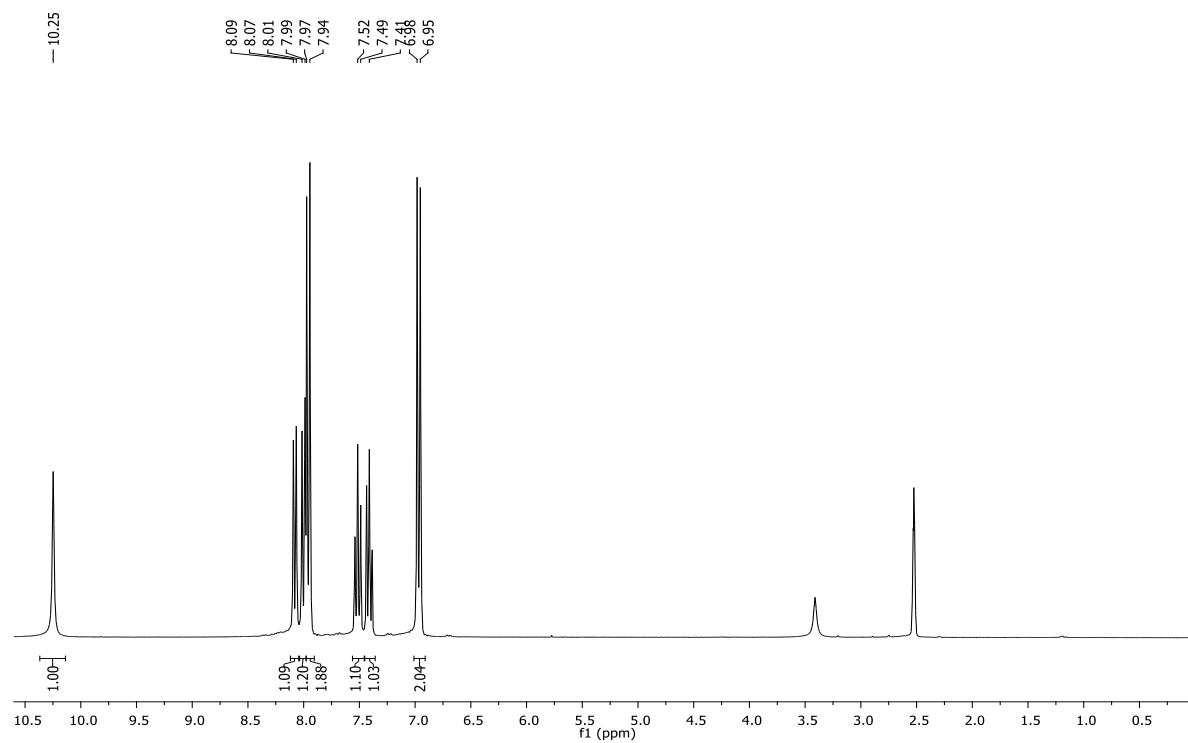

b)

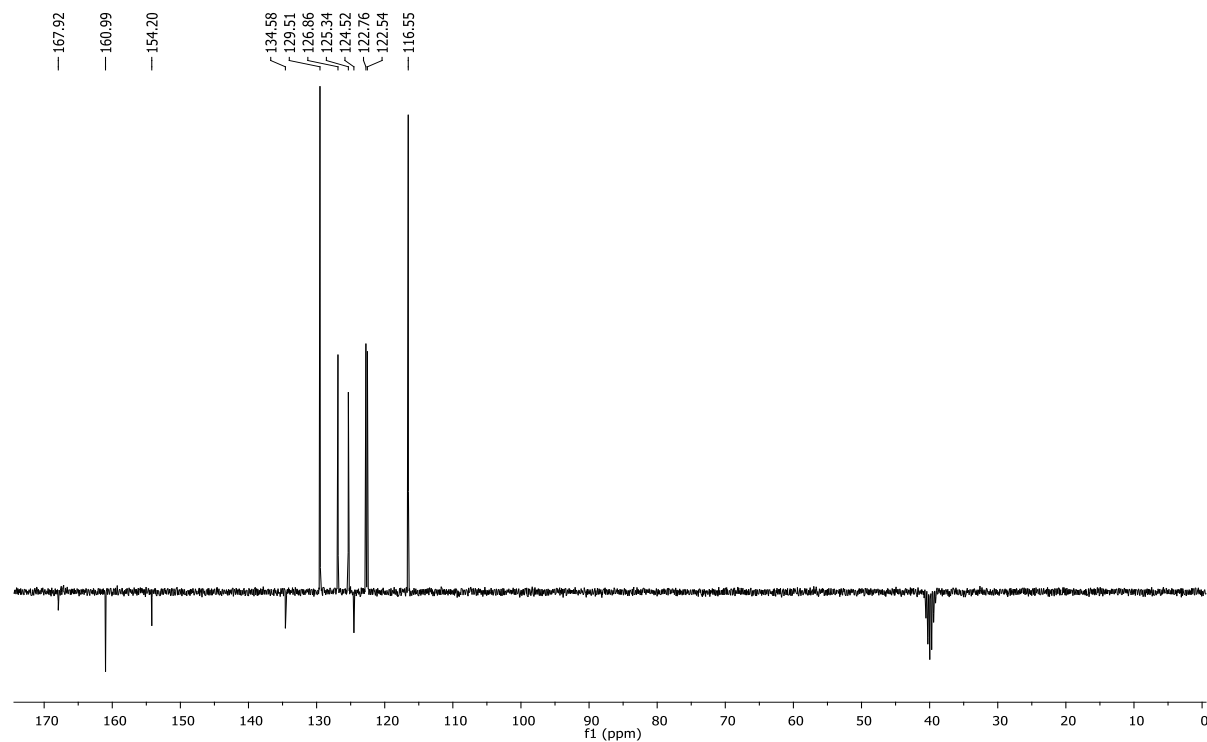

**Fig. S8** a)  $^1\text{H}$  NMR and b)  $^{13}\text{C}$  NMR of compd. **11b**

a)

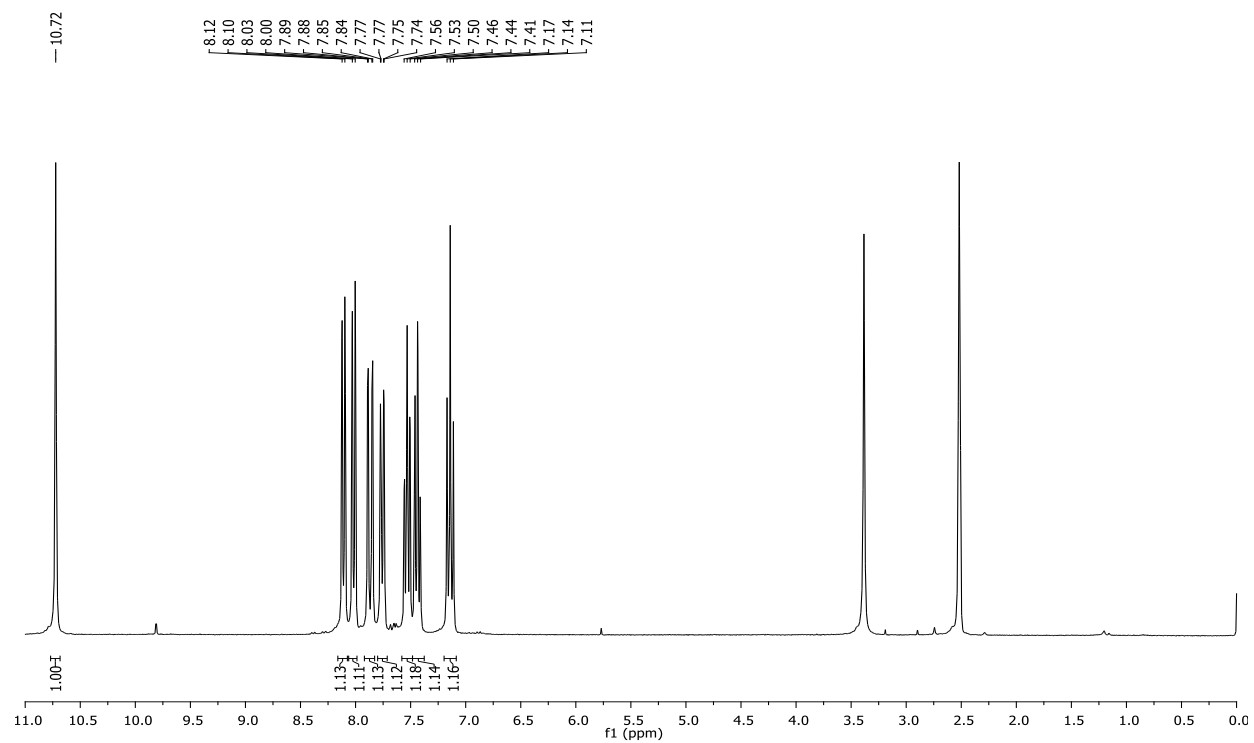

b)

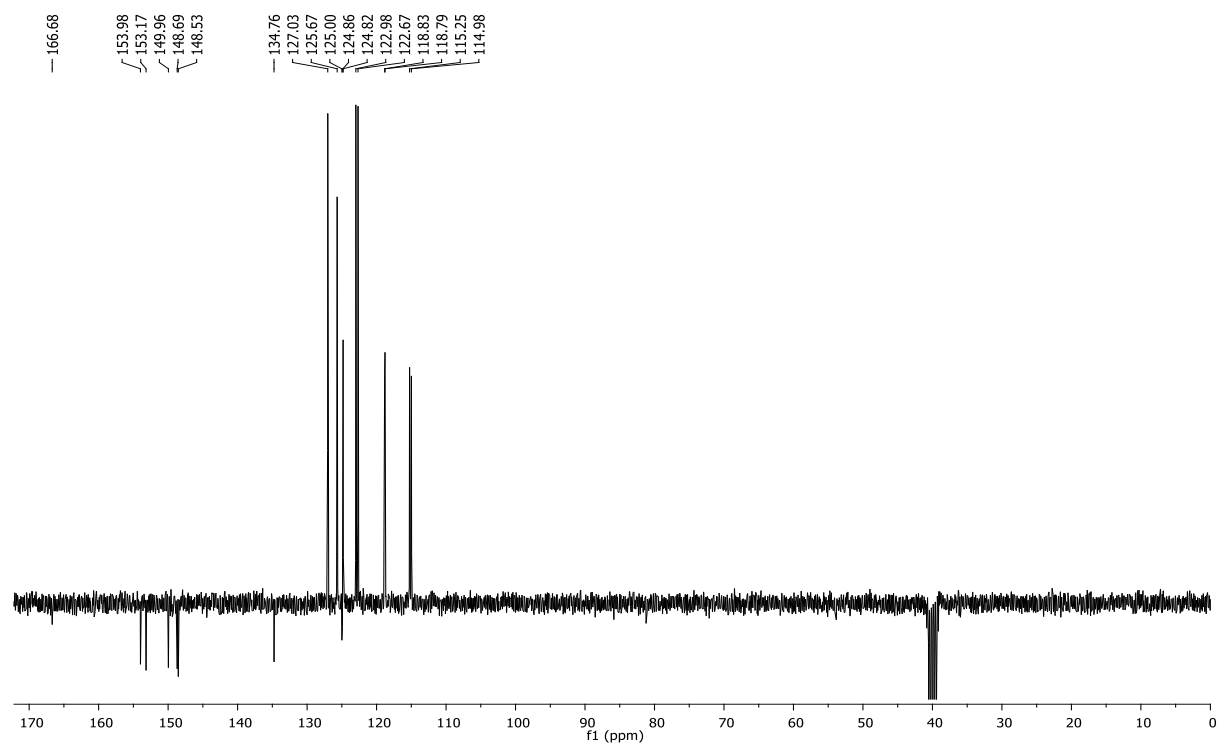

**Fig. S9** a)  $^1\text{H}$  NMR and b)  $^{13}\text{C}$  NMR of compd. **11c**

a)

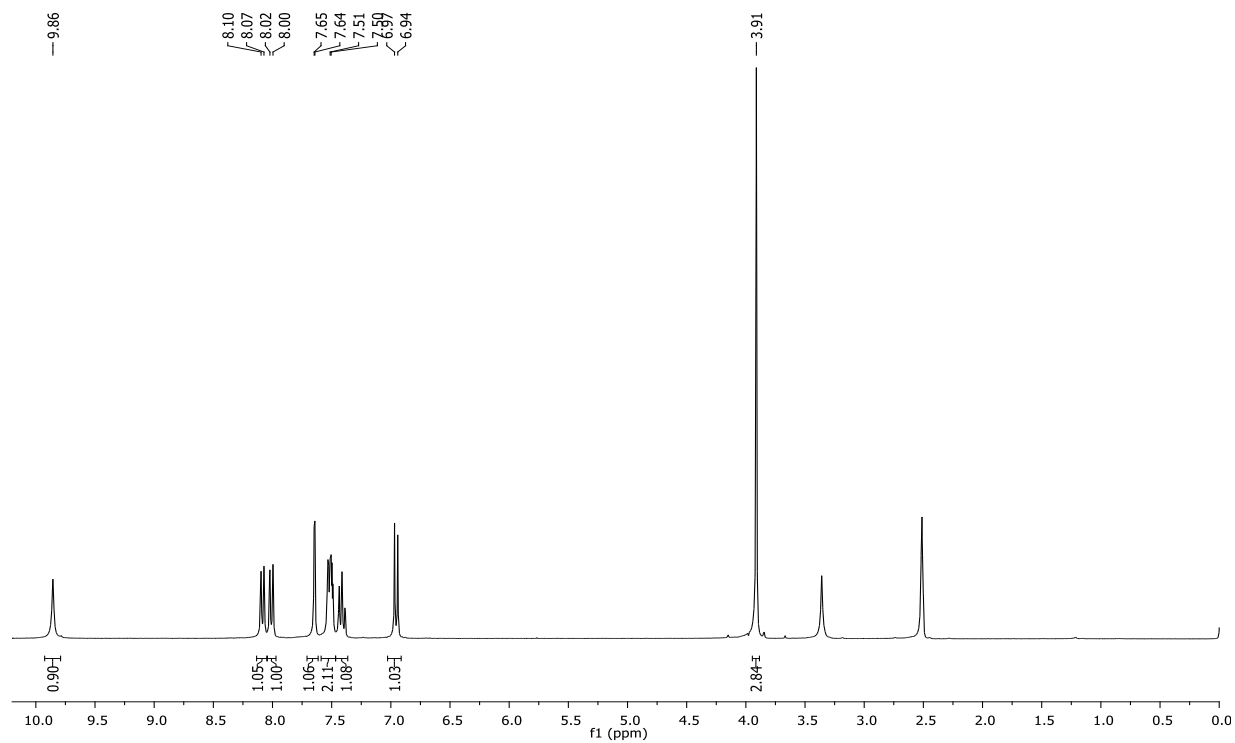

b)

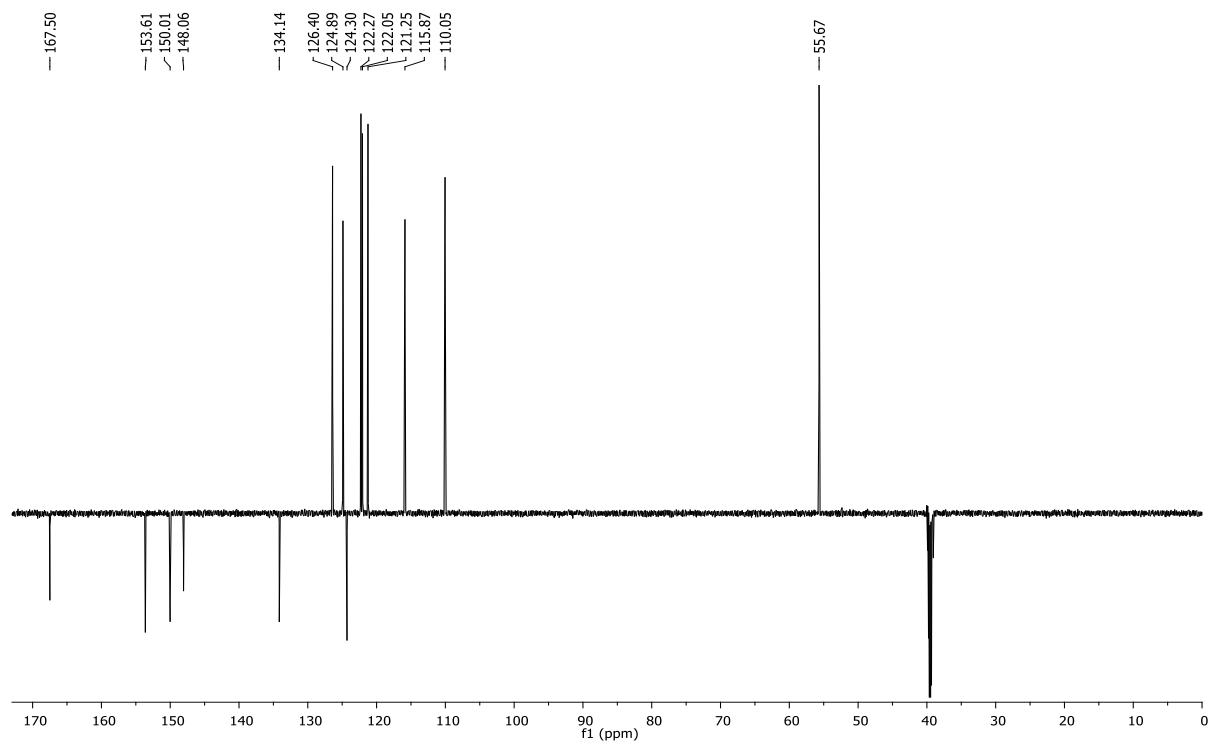

**Fig. S10** a)  $^1\text{H}$  NMR and b)  $^{13}\text{C}$  NMR of compd. **12a**

a)

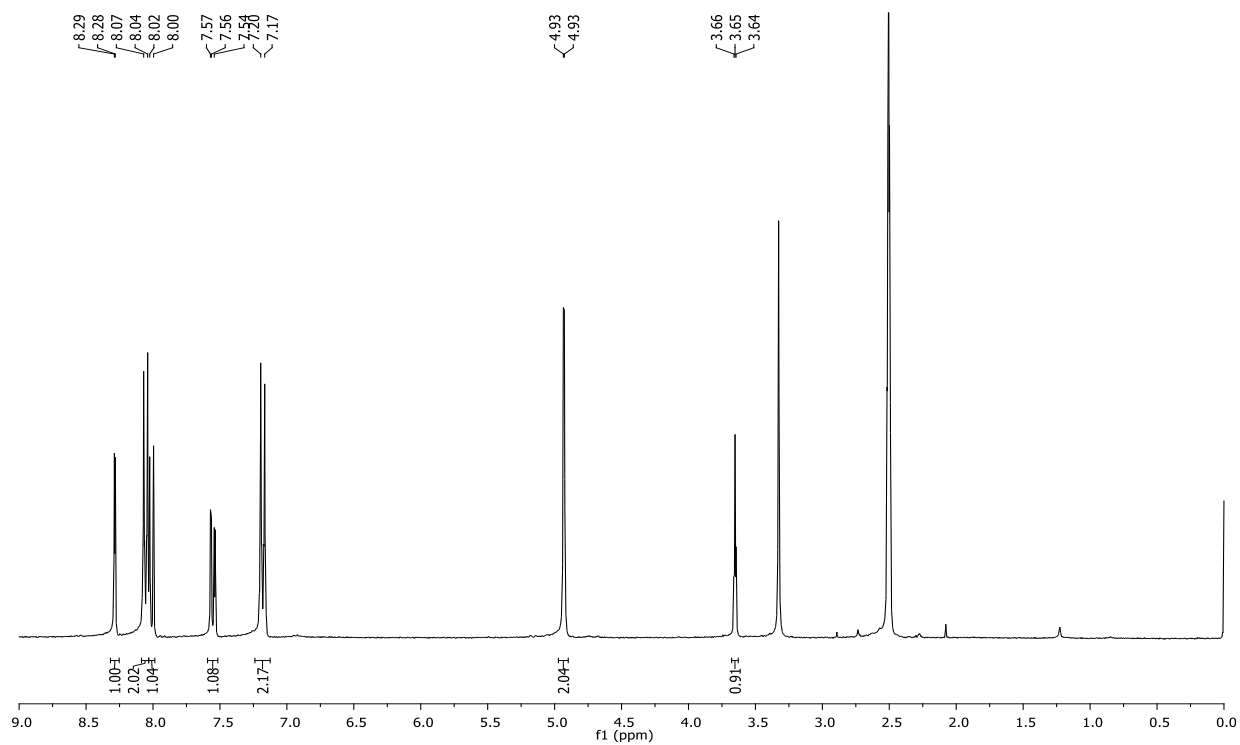

b)

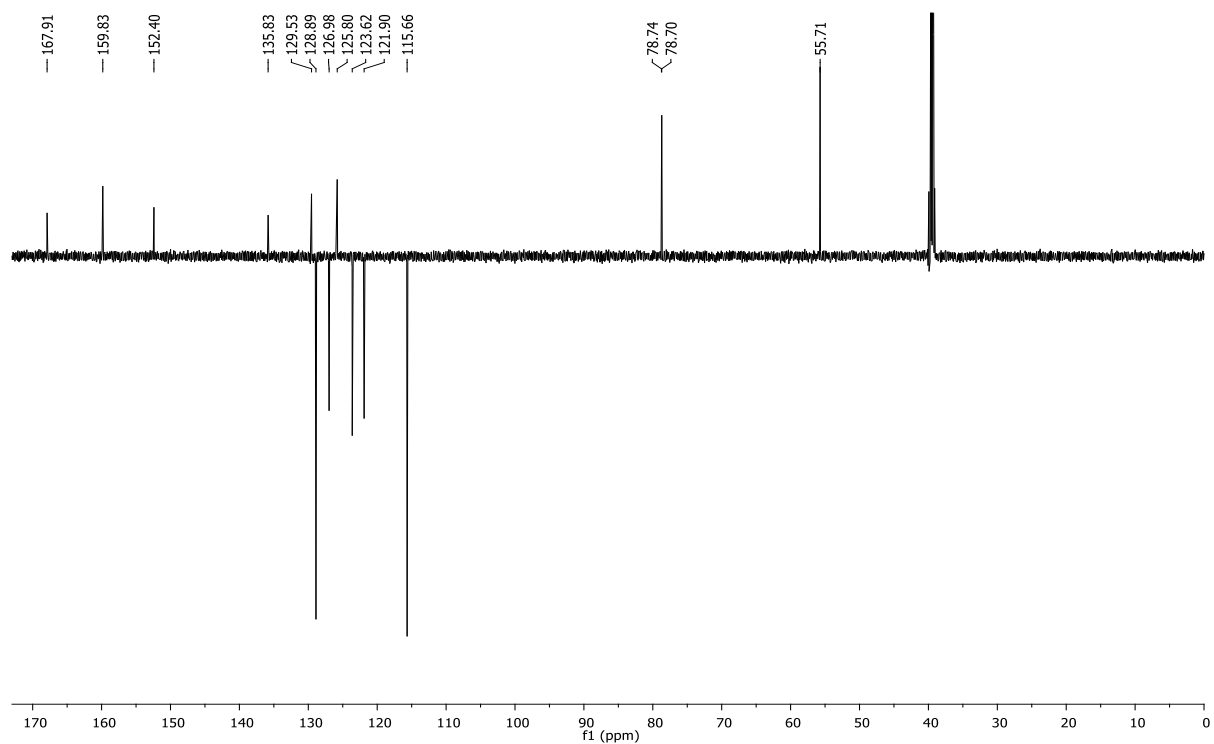

**Fig. S11** a)  $^1\text{H}$  NMR and b)  $^{13}\text{C}$  NMR of compd. **12b**

a)

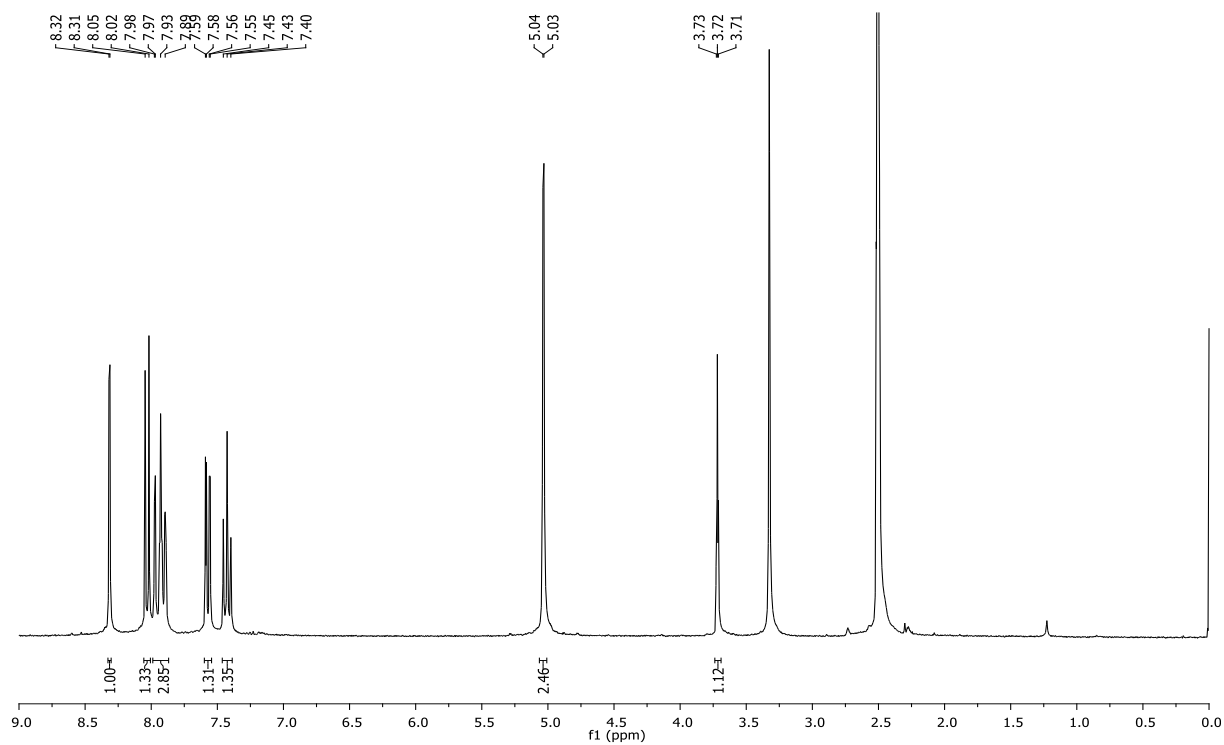

b)

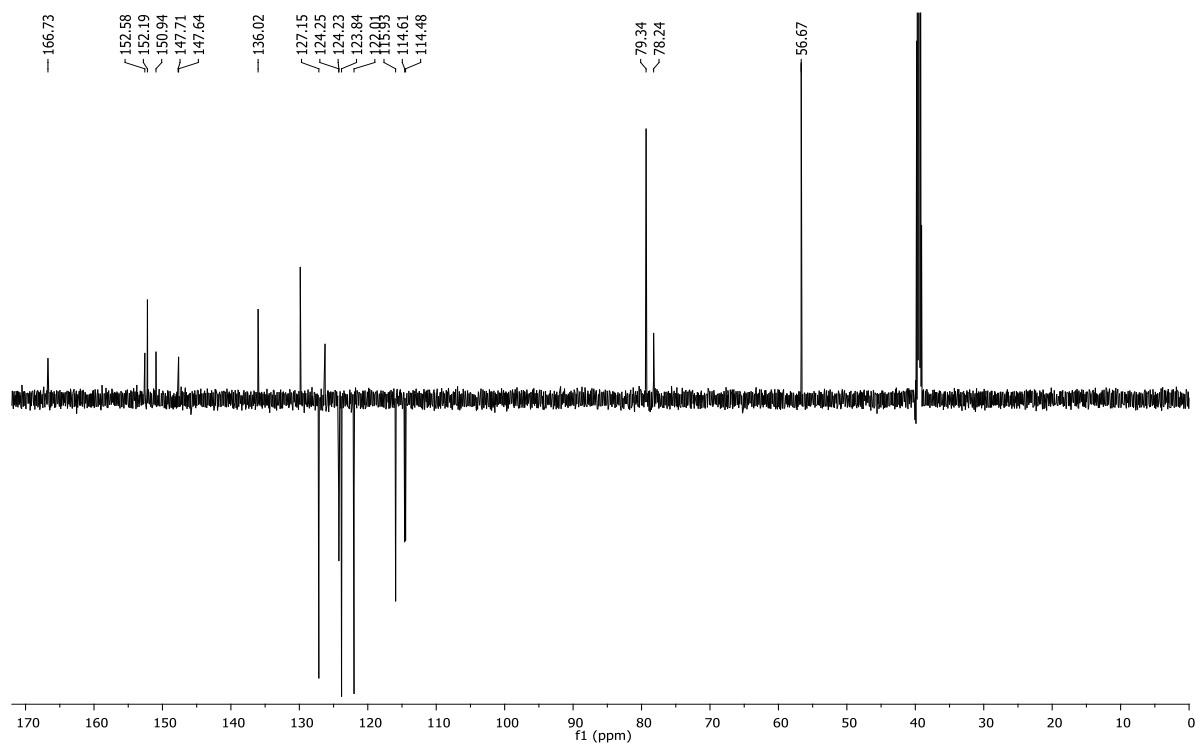



**Fig. S12** a)  $^1\text{H}$  NMR and b)  $^{13}\text{C}$  NMR of compd. **12c**

a)

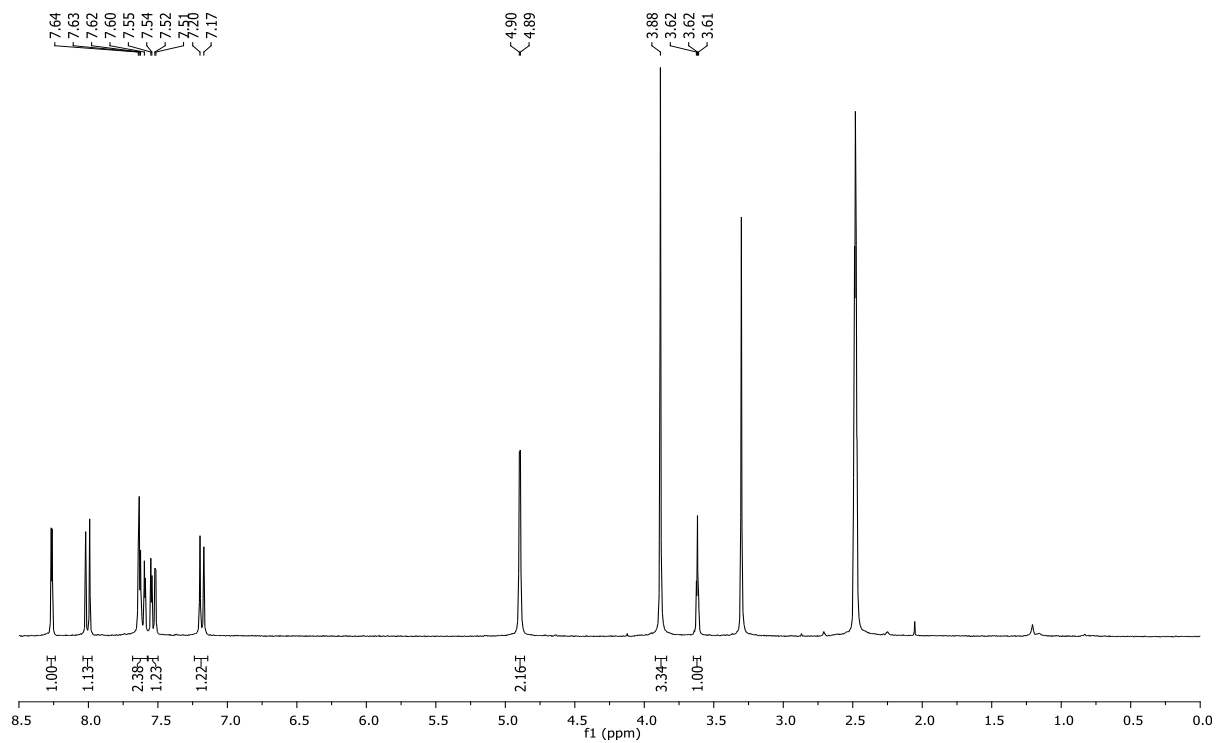

b)

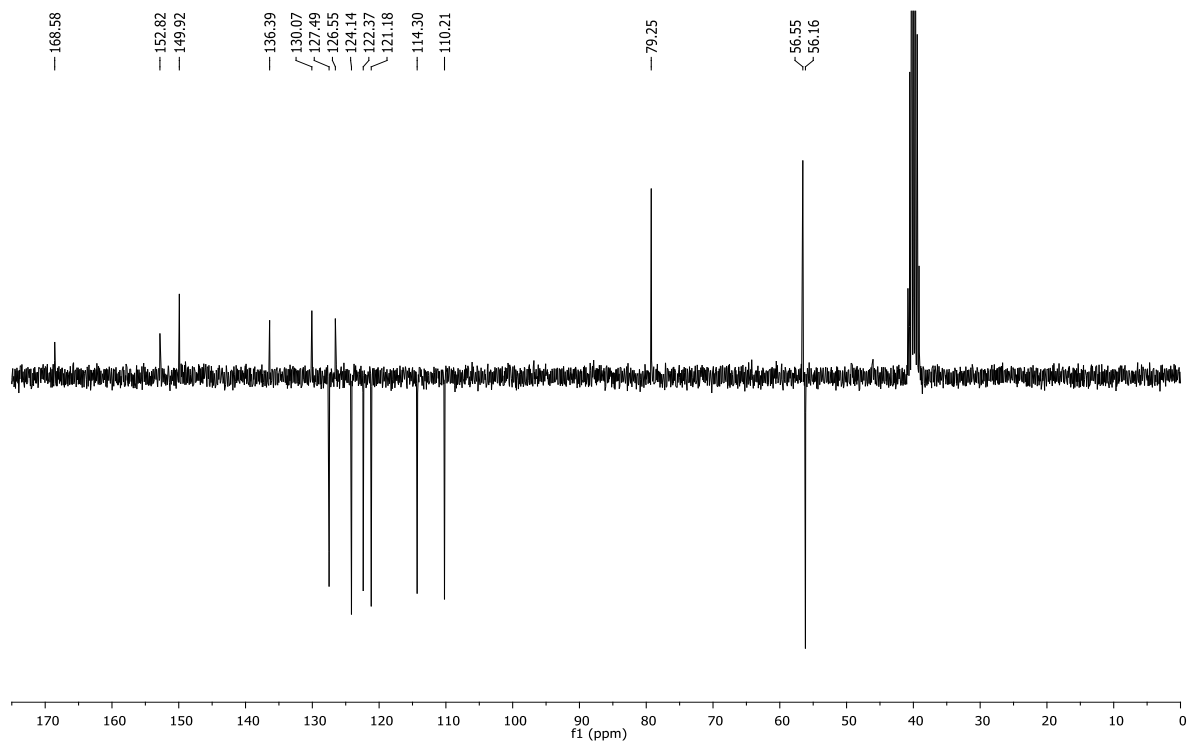

**Fig. S13** a)  $^1\text{H}$  NMR and b)  $^{13}\text{C}$  NMR of compd. **13a**

a)

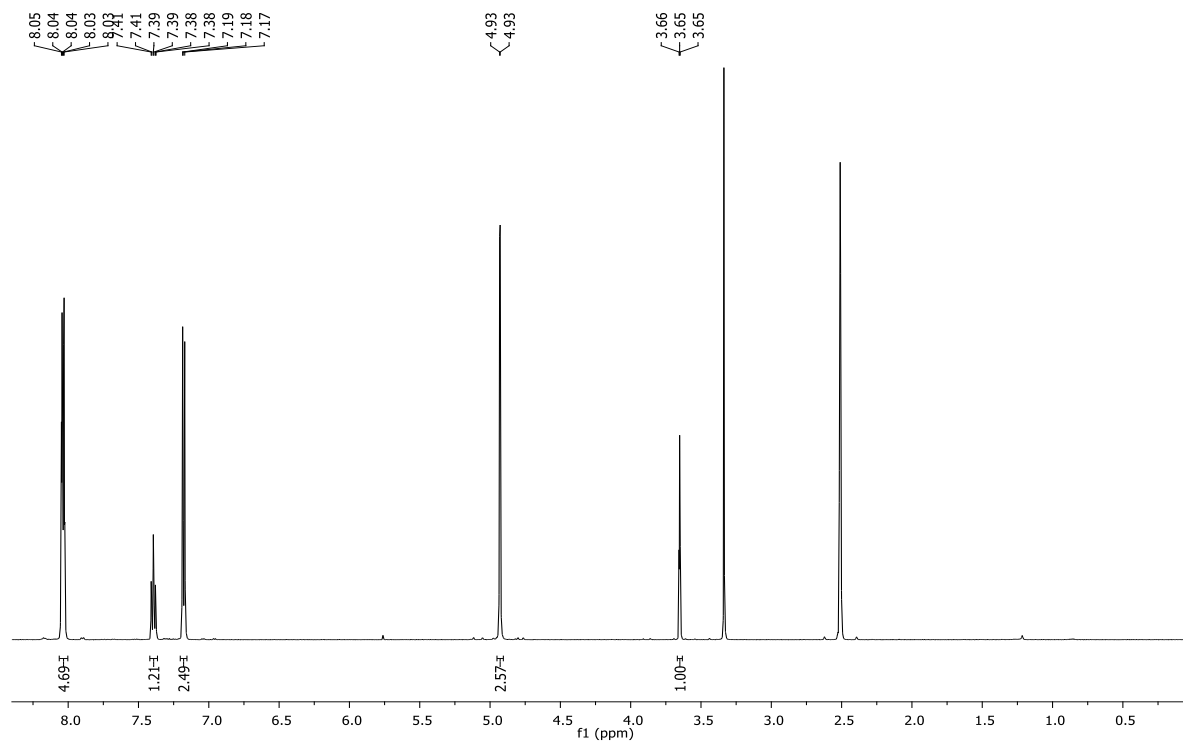

b)

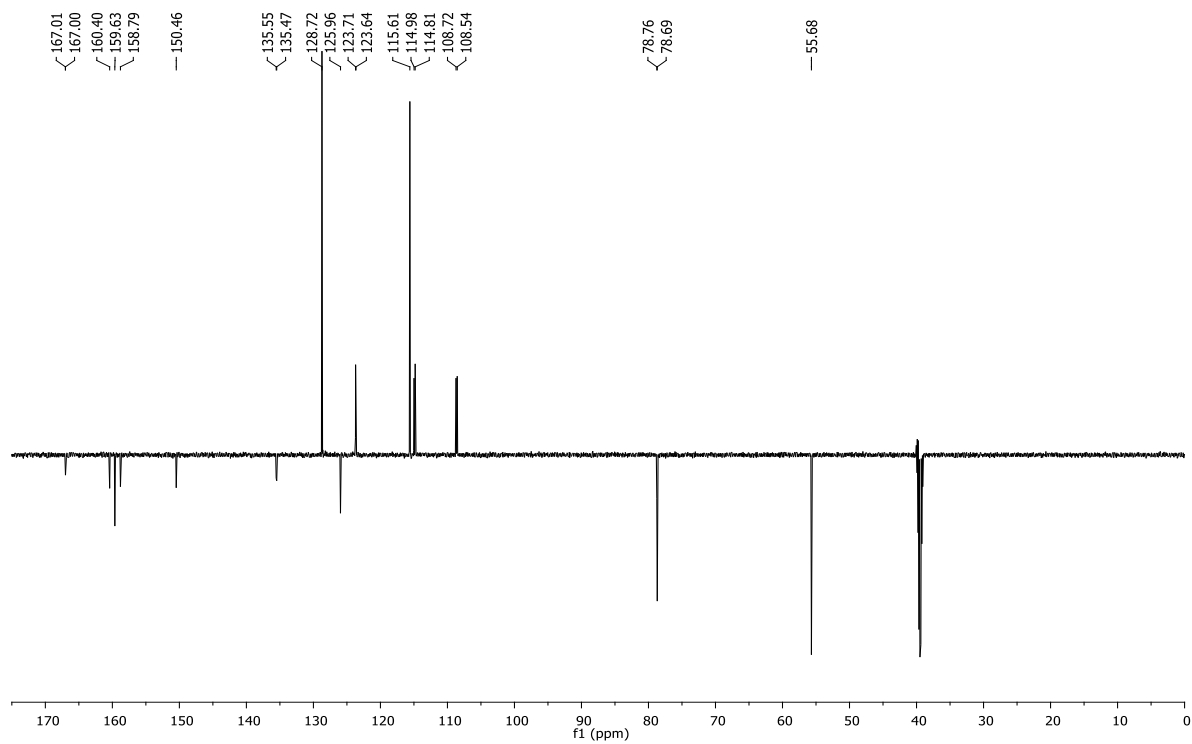

**Fig. S14** a)  $^1\text{H}$  NMR and b)  $^{13}\text{C}$  NMR of compd. **13b**

a)

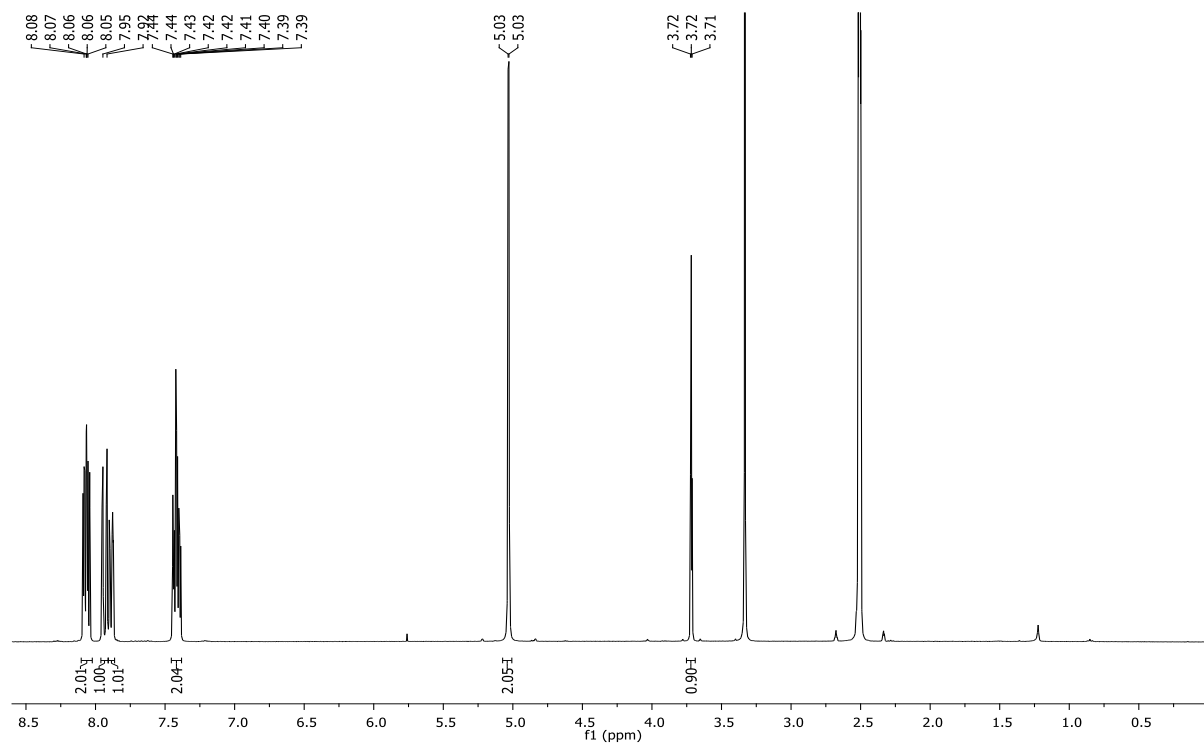

b)

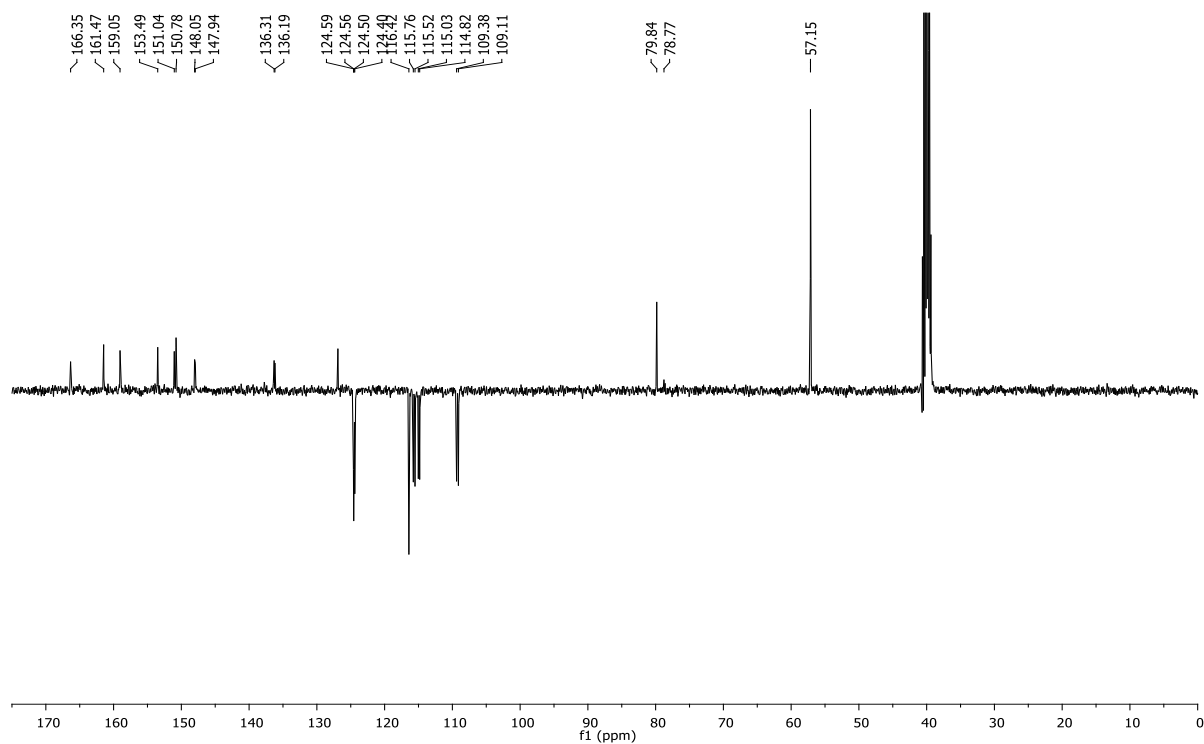

**Fig. S15** a)  $^1\text{H}$  NMR and b)  $^{13}\text{C}$  NMR of compd. **13c**

a)

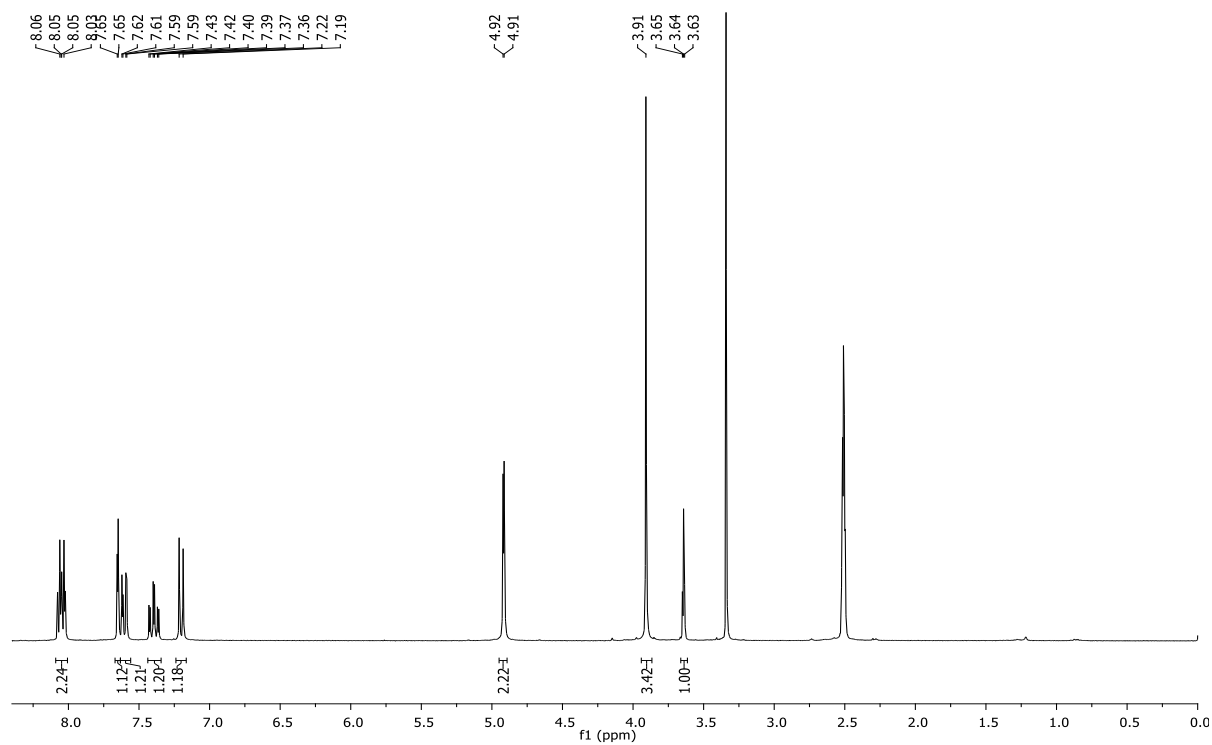

b)

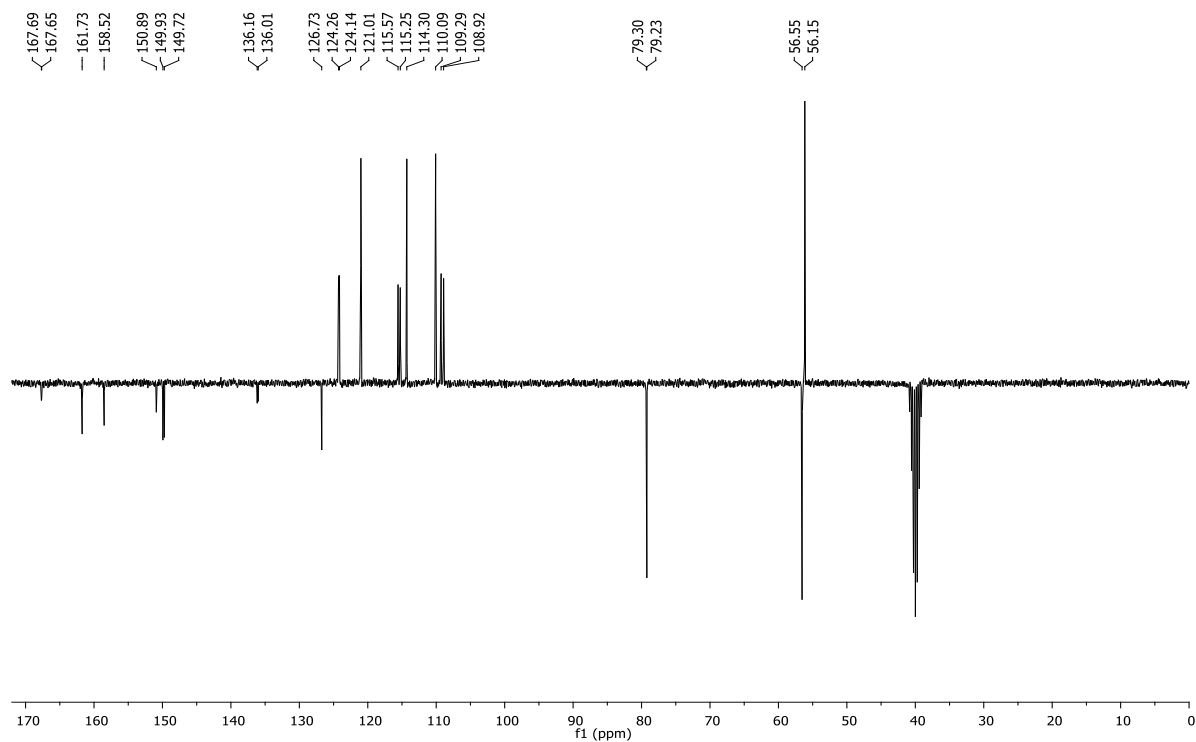

**Fig. S16** a)  $^1\text{H}$  NMR and b)  $^{13}\text{C}$  NMR of compd. **14a**

a)

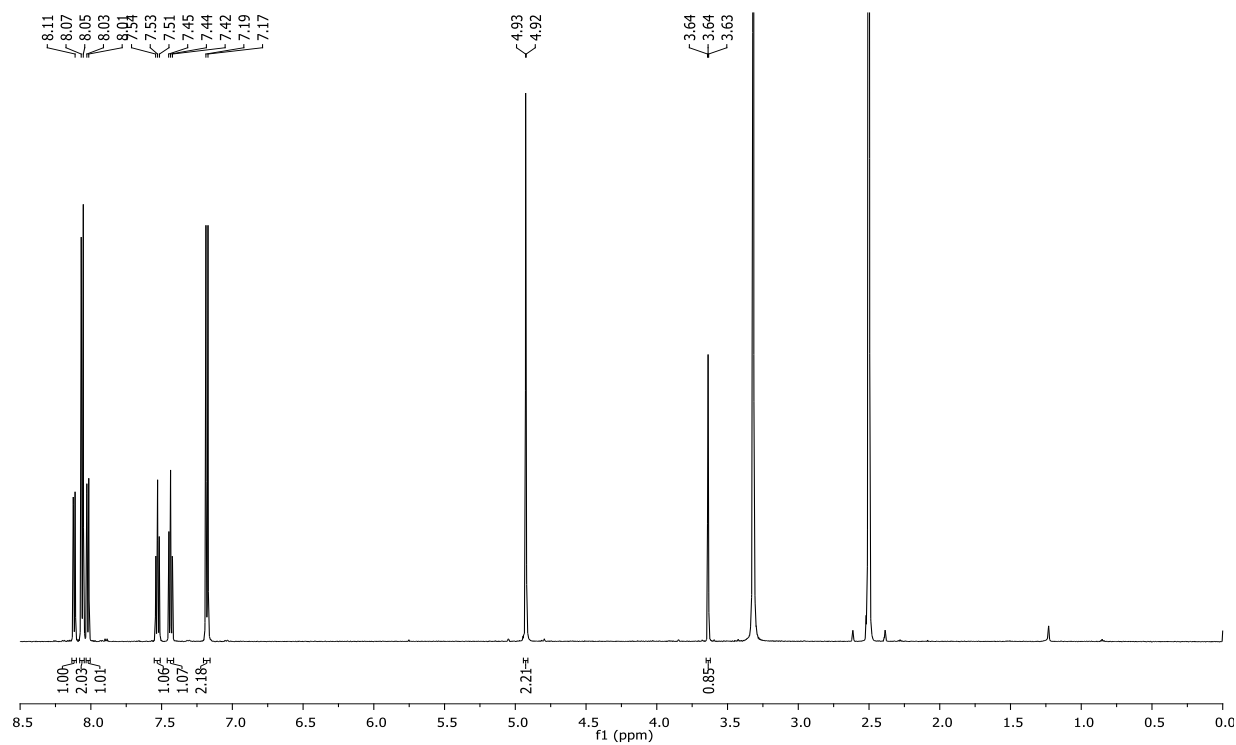

b)

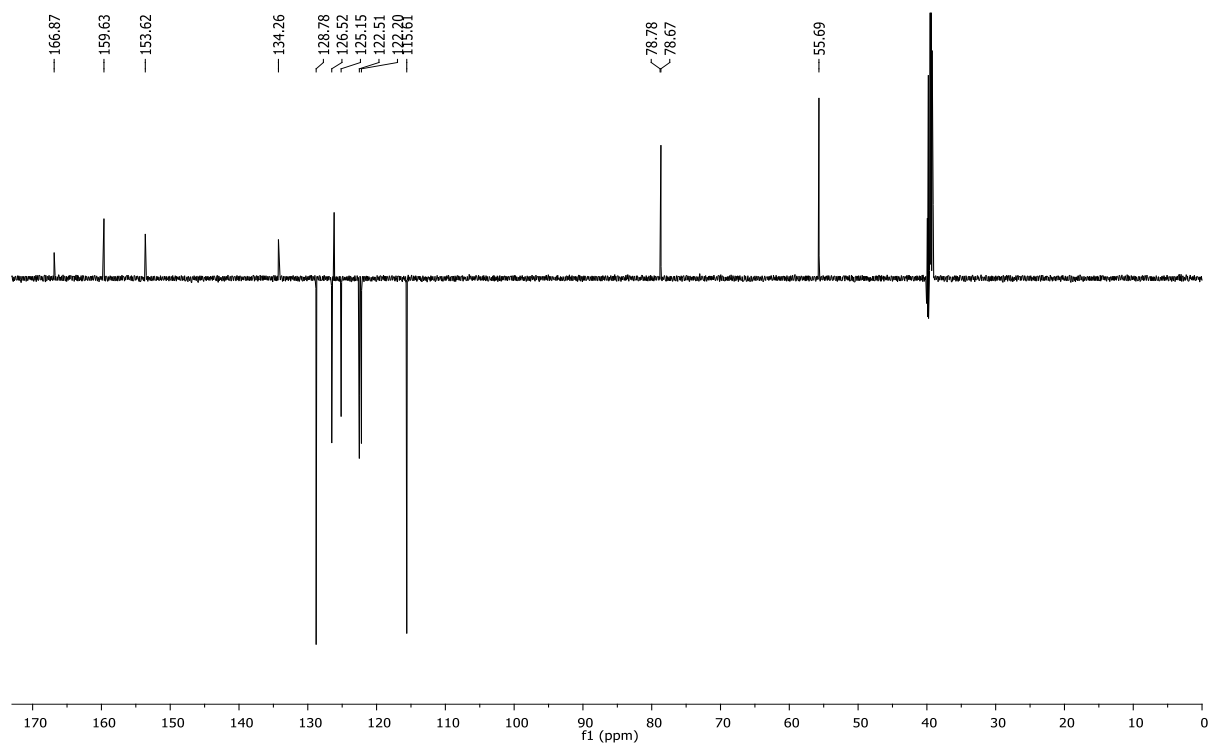

**Fig. S17** a)  $^1\text{H}$  NMR and b)  $^{13}\text{C}$  NMR of compd. **14b**

a)

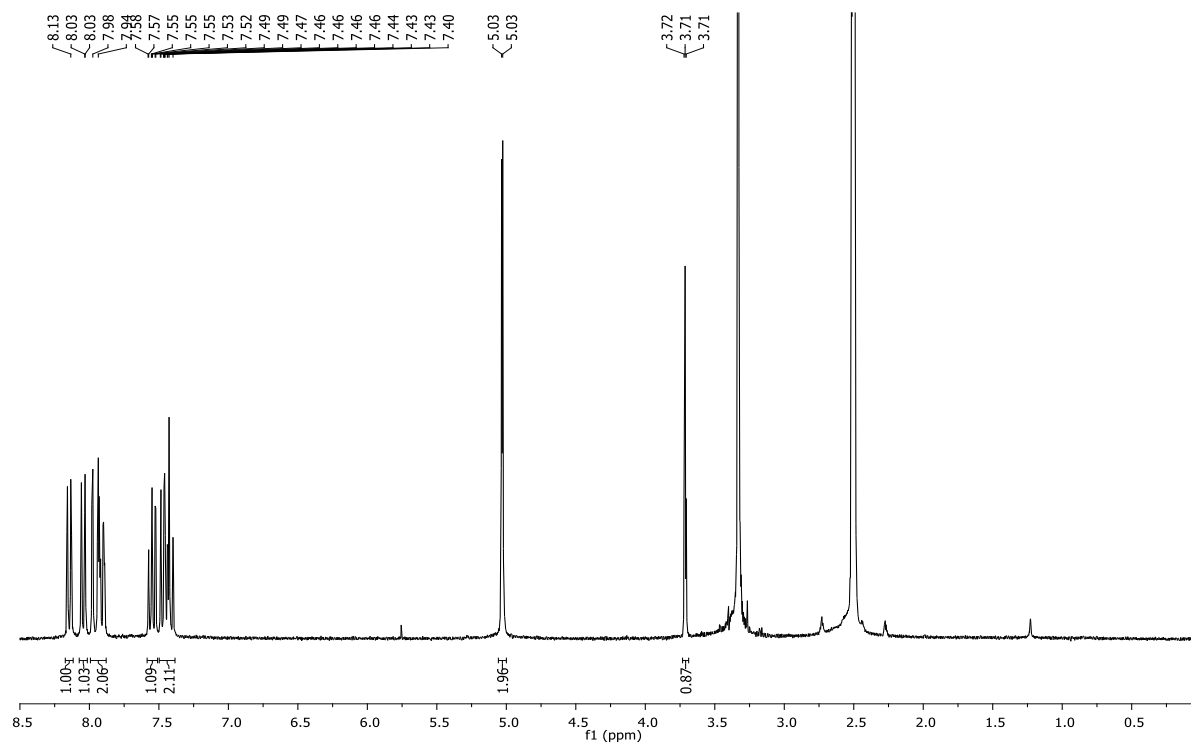

b)

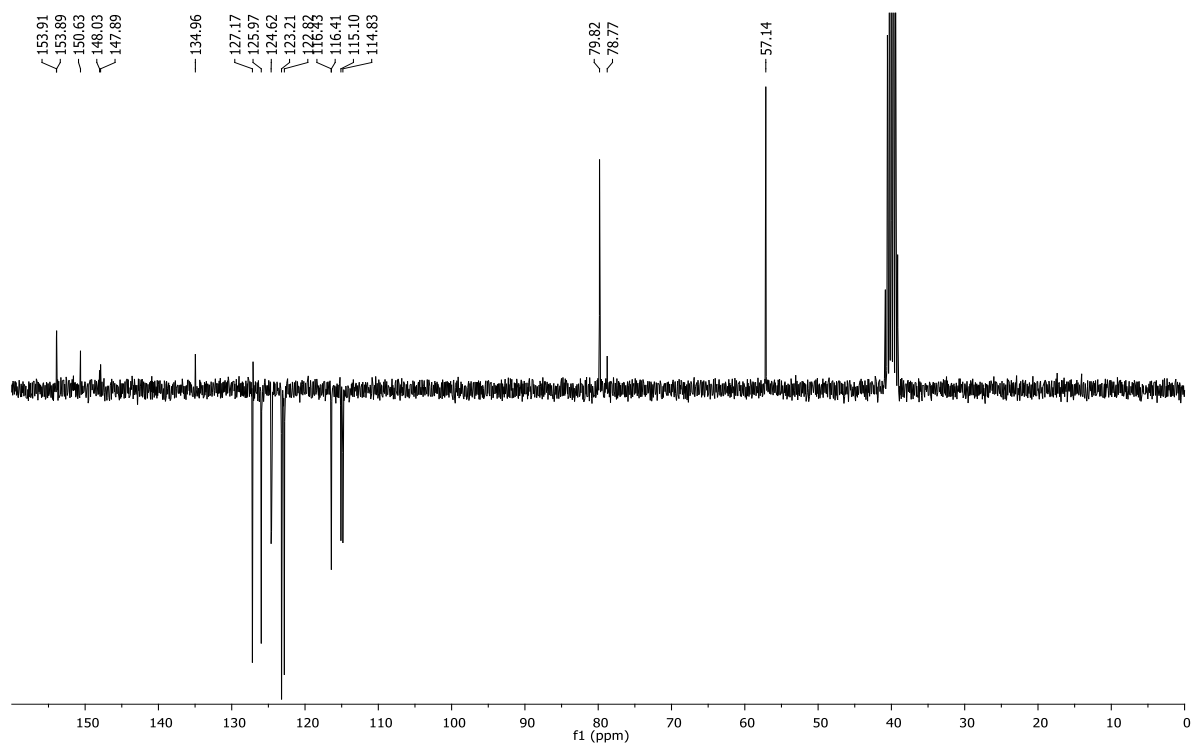

**Fig. S18** a)  $^1\text{H}$  NMR and b)  $^{13}\text{C}$  NMR of compd. **14c**

a)

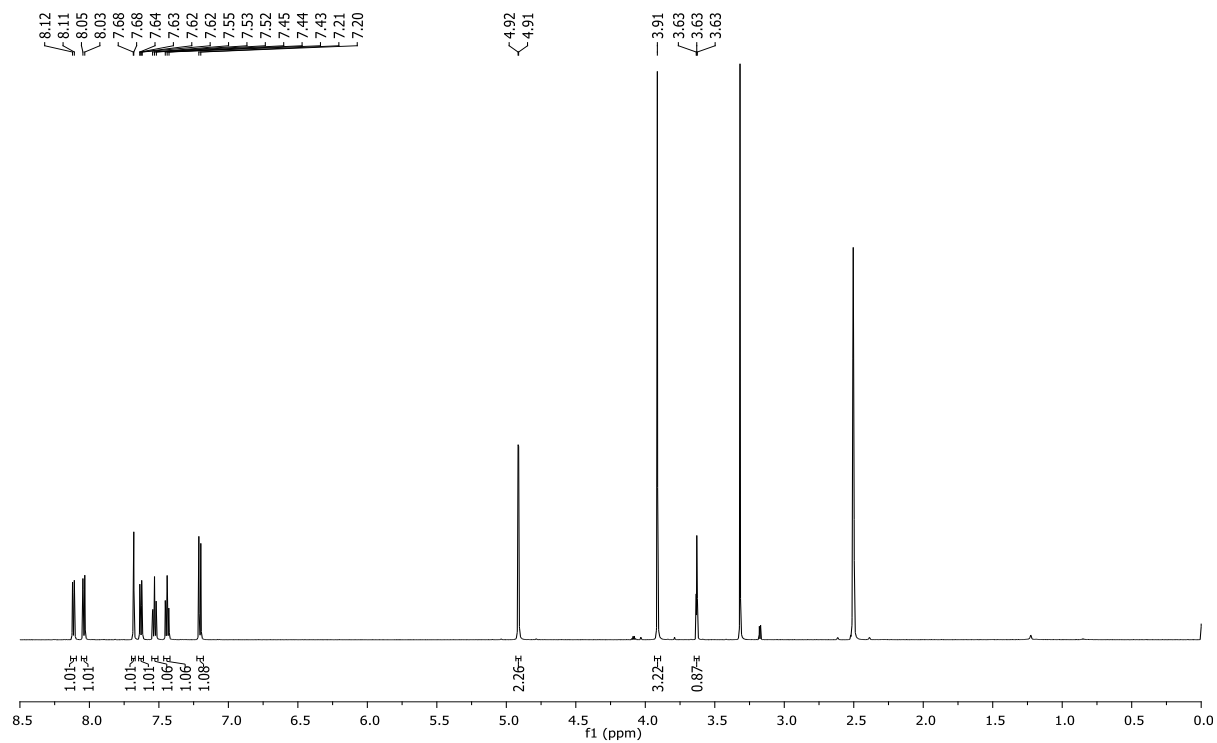

b)

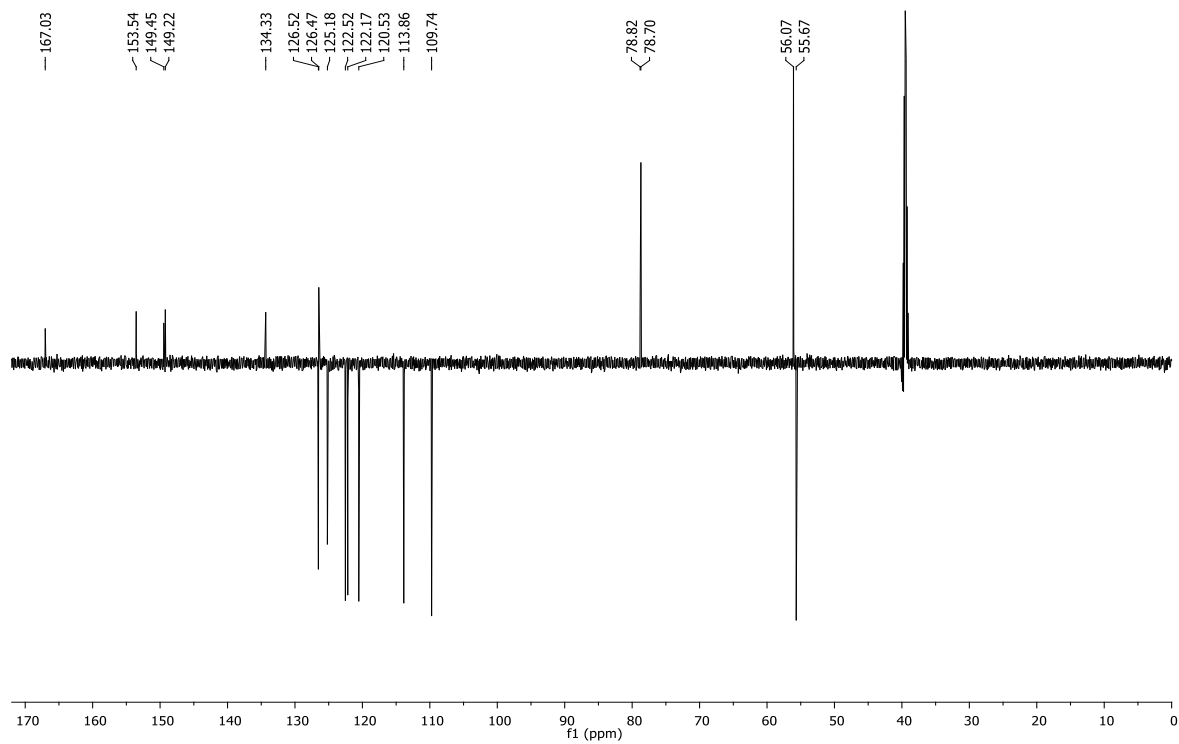

**Fig. S19** a)  $^1\text{H}$  NMR and b)  $^{13}\text{C}$  NMR of compd. **15a**

a)

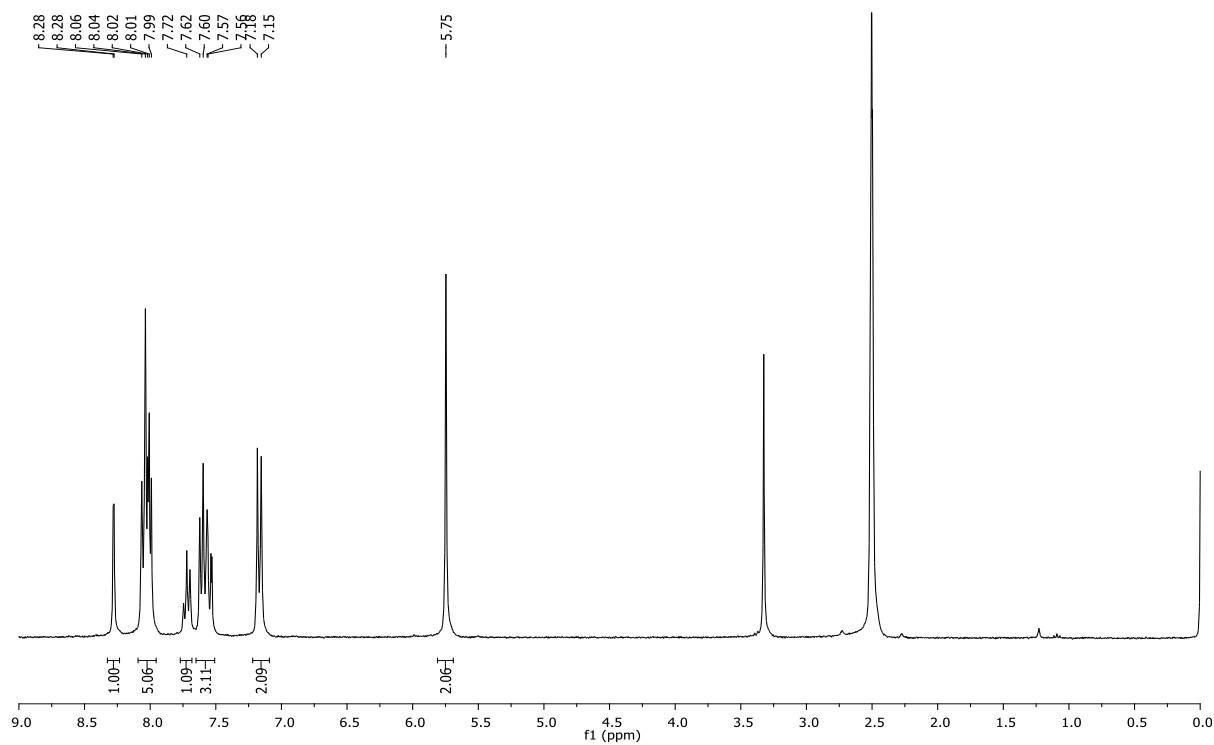

b)

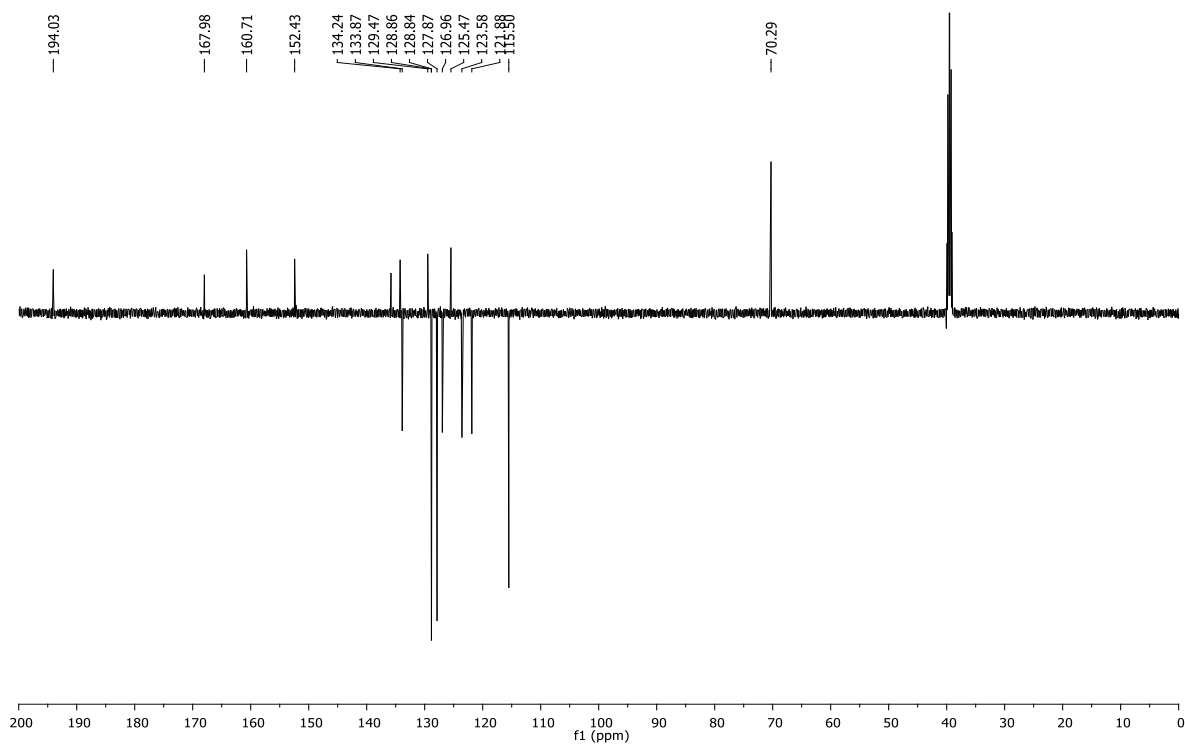



**Fig. S20** a)  $^1\text{H}$  NMR and b)  $^{13}\text{C}$  NMR of compd. **15b**

a)

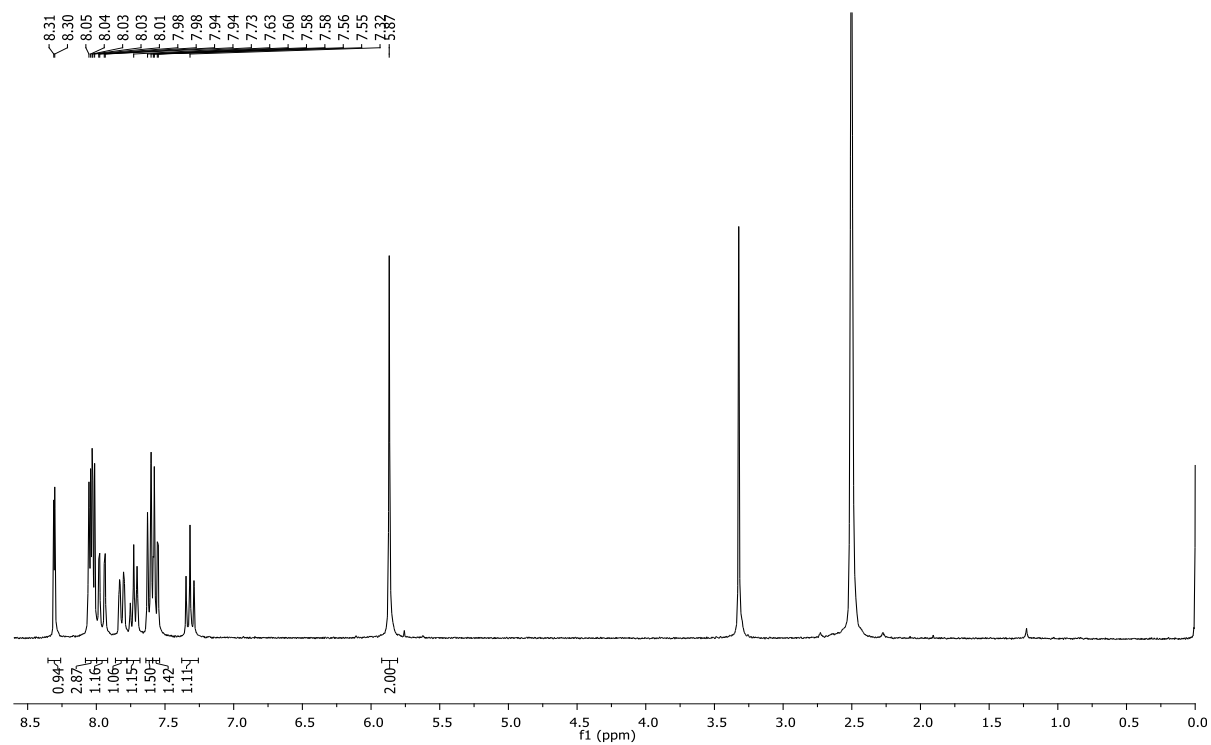

b)

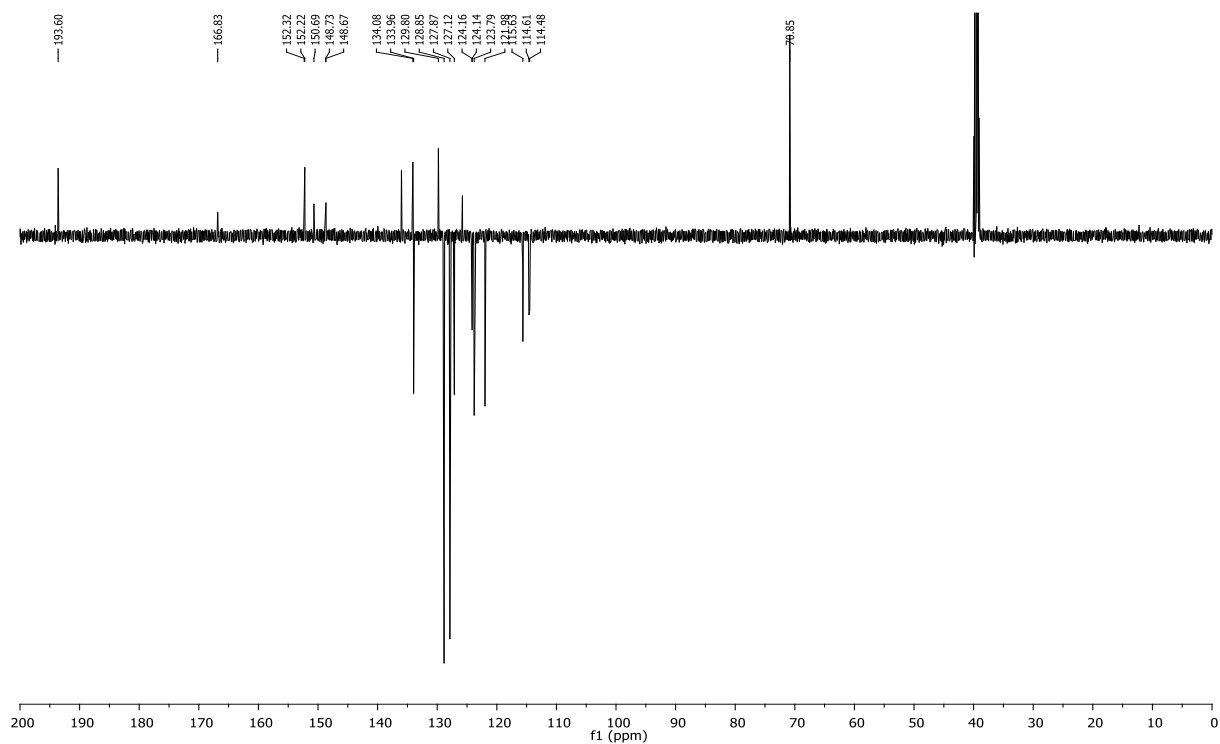

**Fig. S21** a)  $^1\text{H}$  NMR and b)  $^{13}\text{C}$  NMR of compd. **15c**

a)

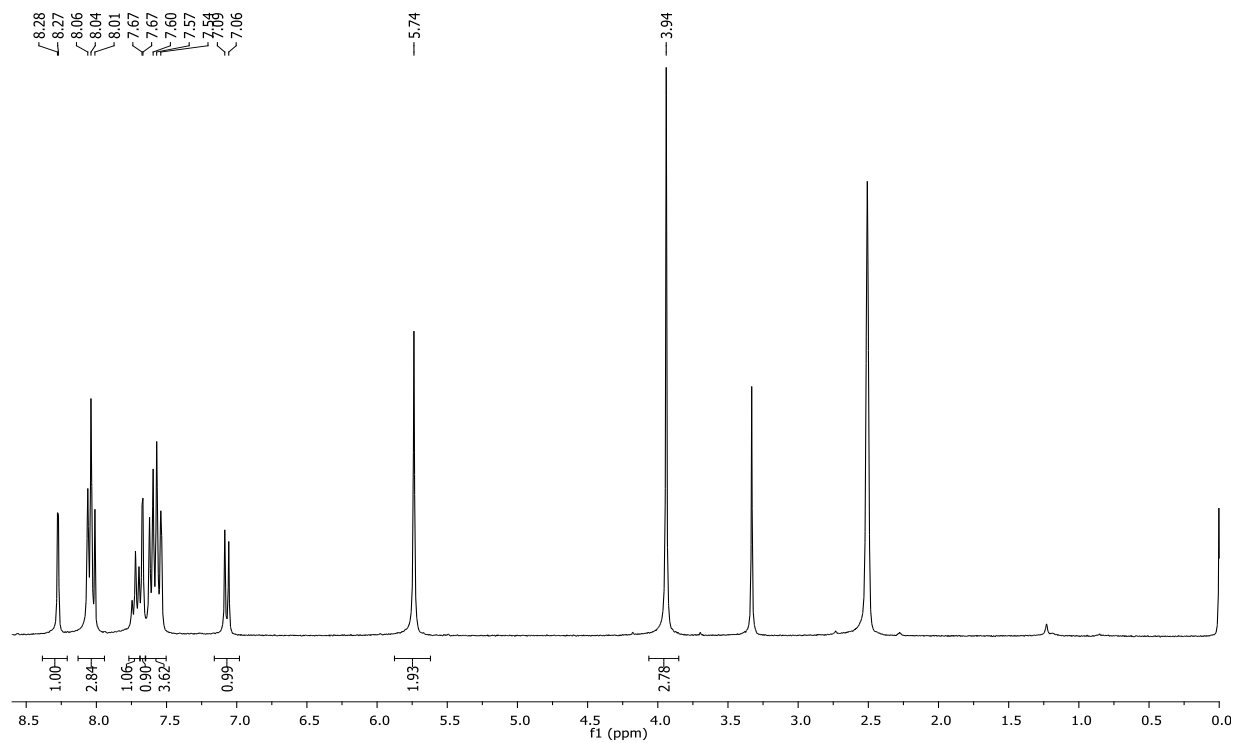

b)

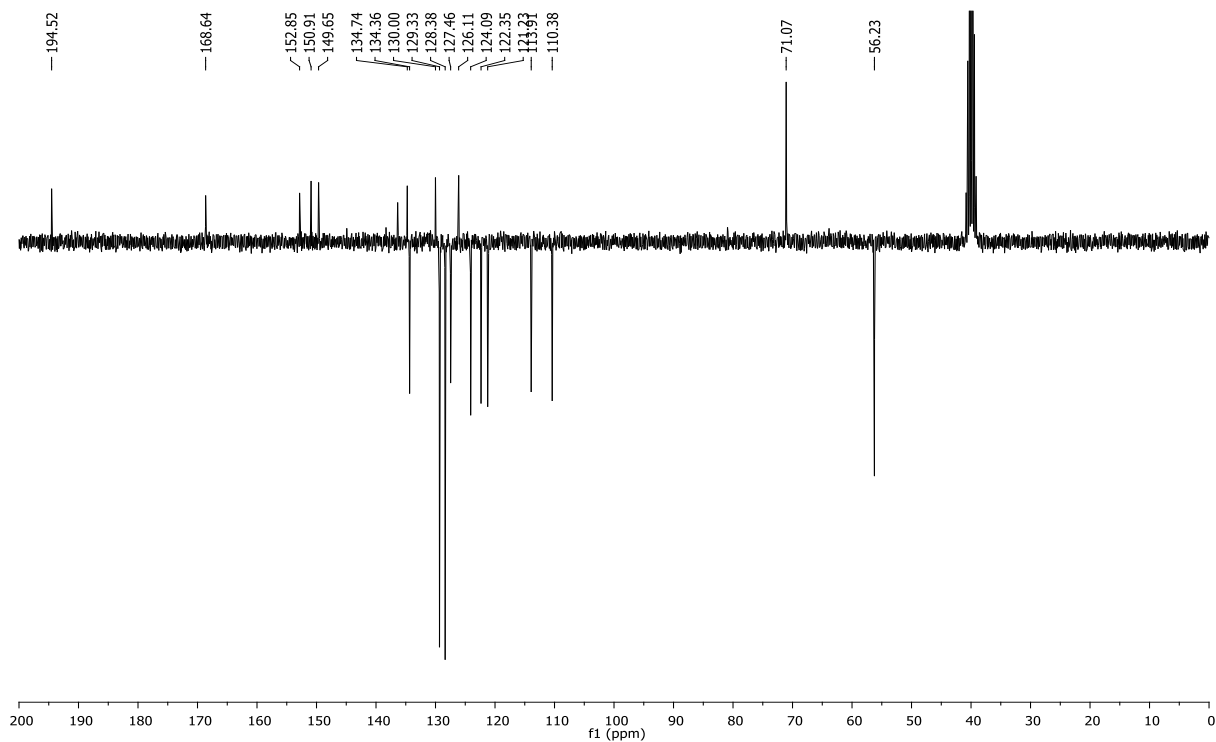

**Fig. S22** a)  $^1\text{H}$  NMR and b)  $^{13}\text{C}$  NMR of compd. **16a**

a)

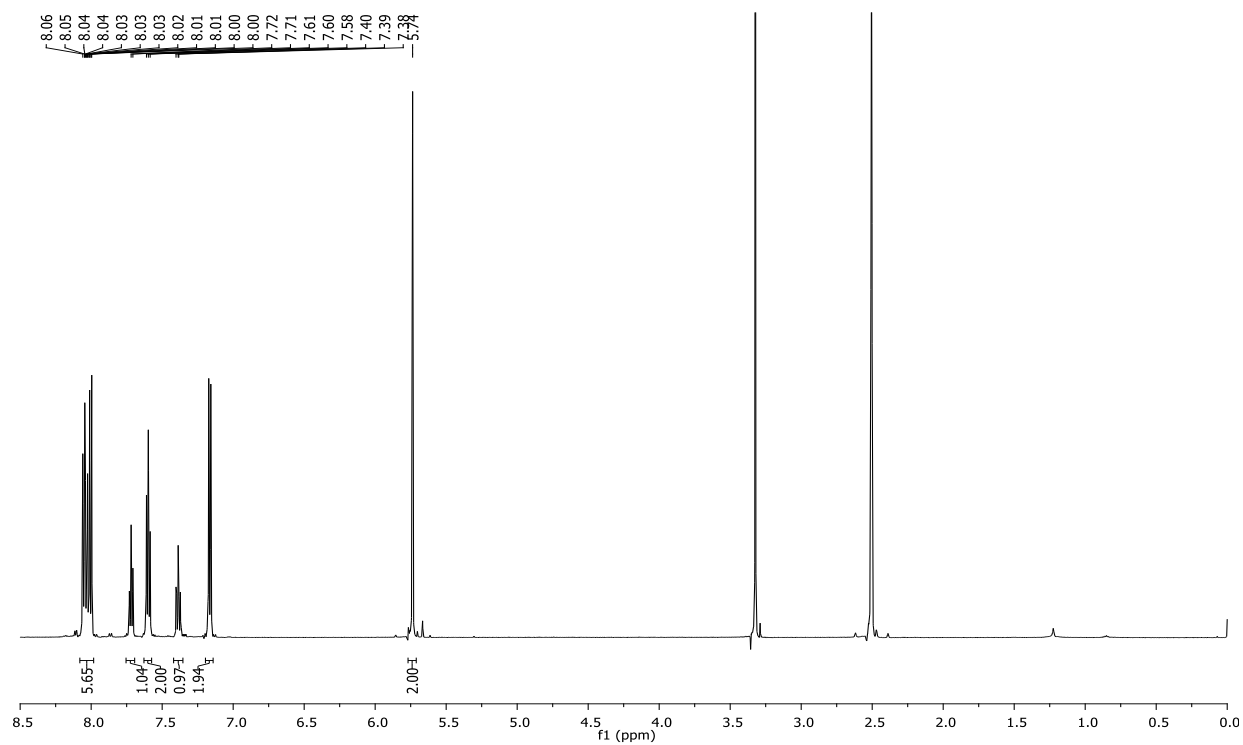

b)

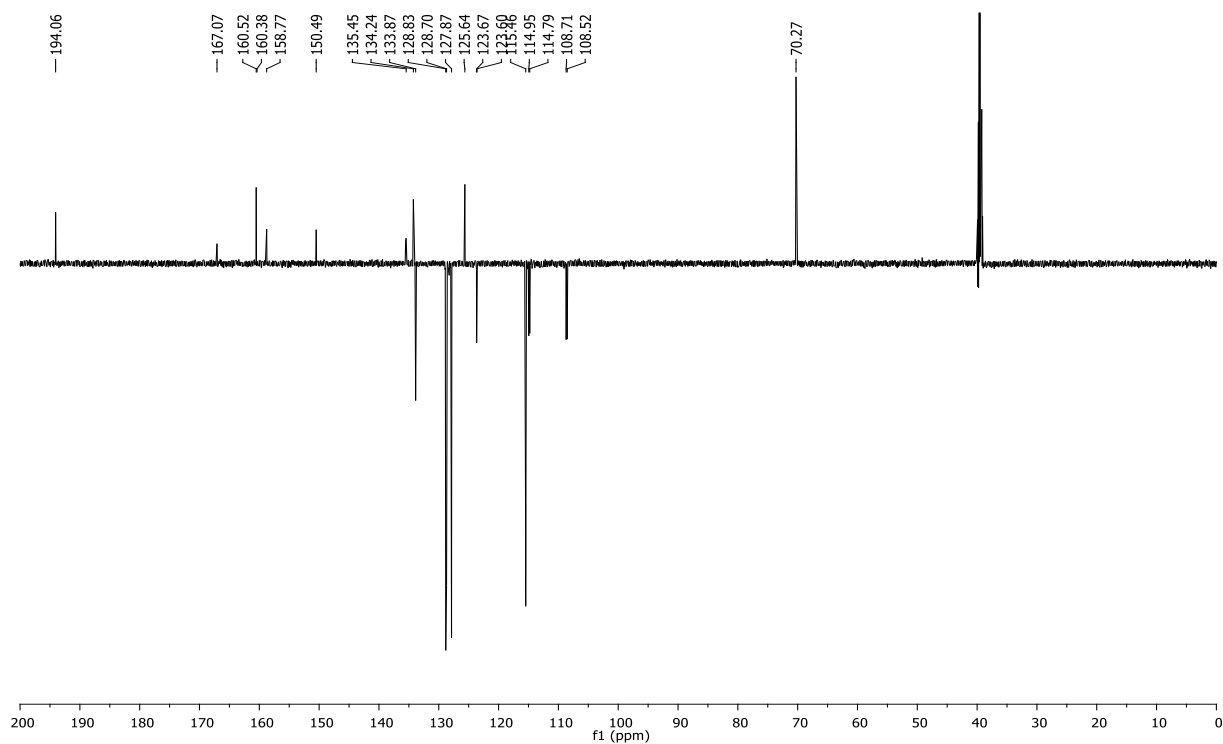

**Fig. S23** a)  $^1\text{H}$  NMR and b)  $^{13}\text{C}$  NMR of compd. **16b**

a)

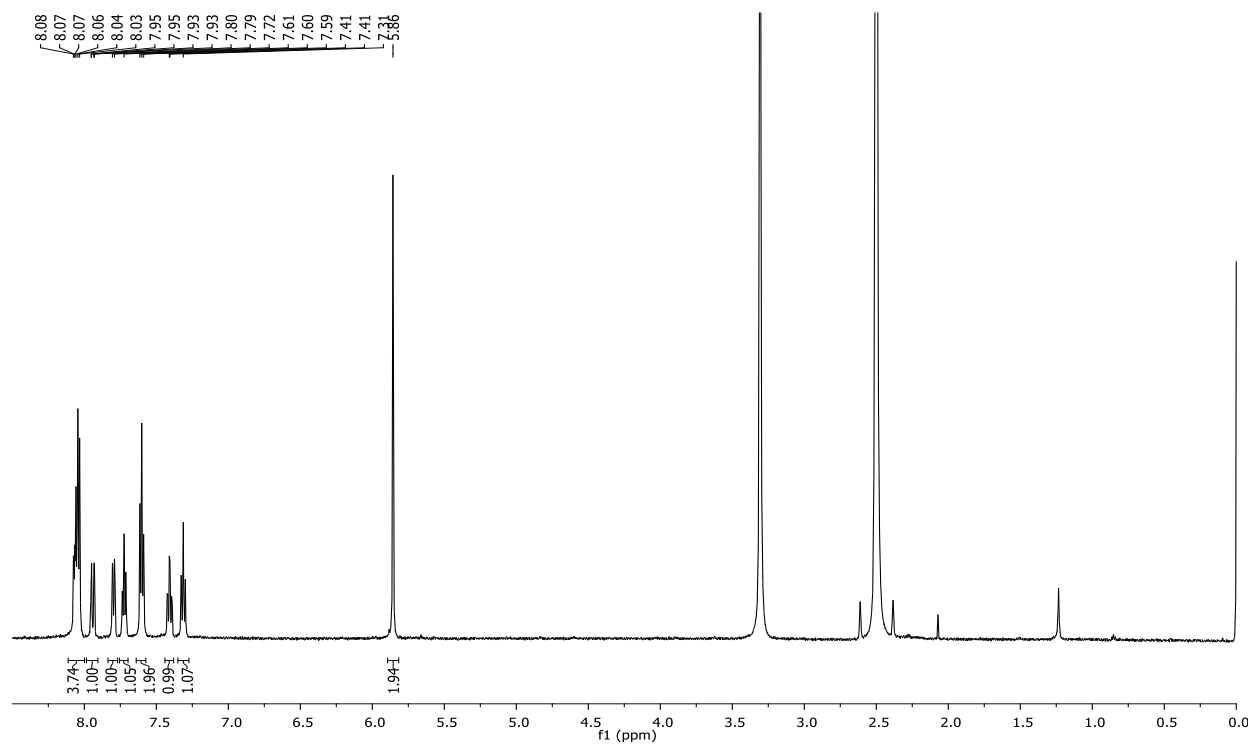

b)

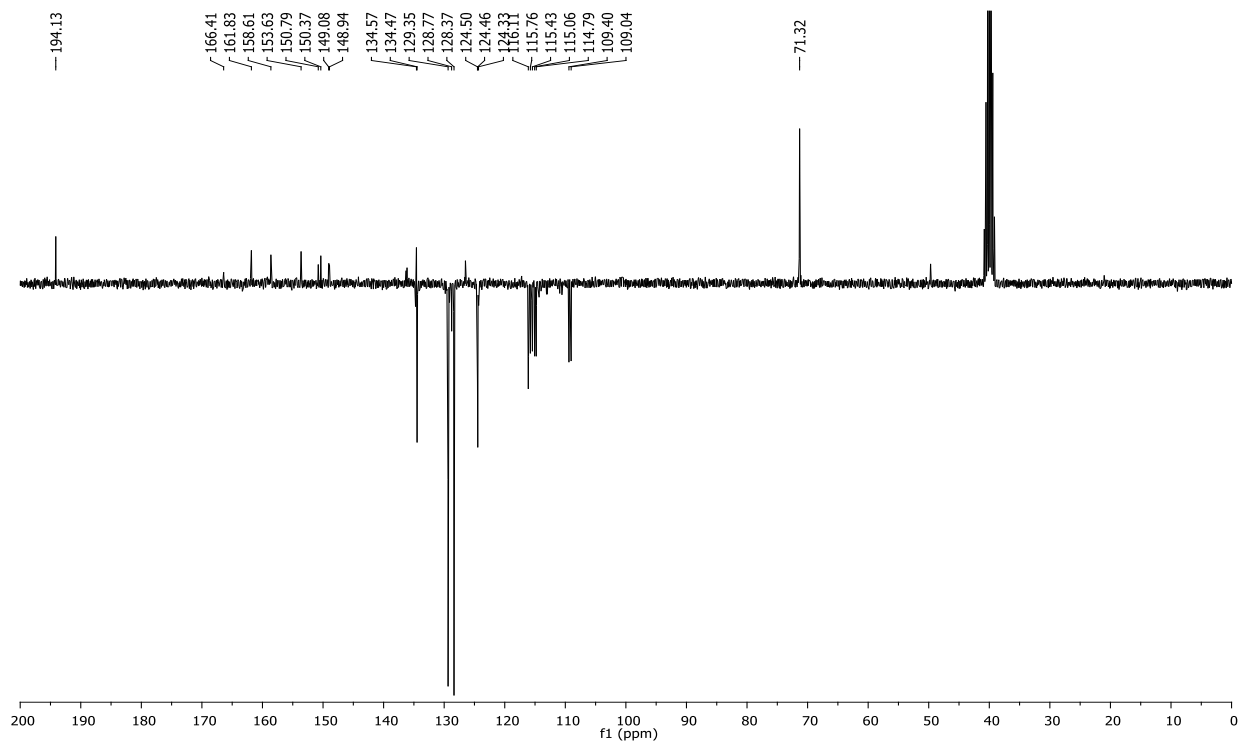

**Fig. S24** a)  $^1\text{H}$  NMR and b)  $^{13}\text{C}$  NMR of compd. **16c**

a)

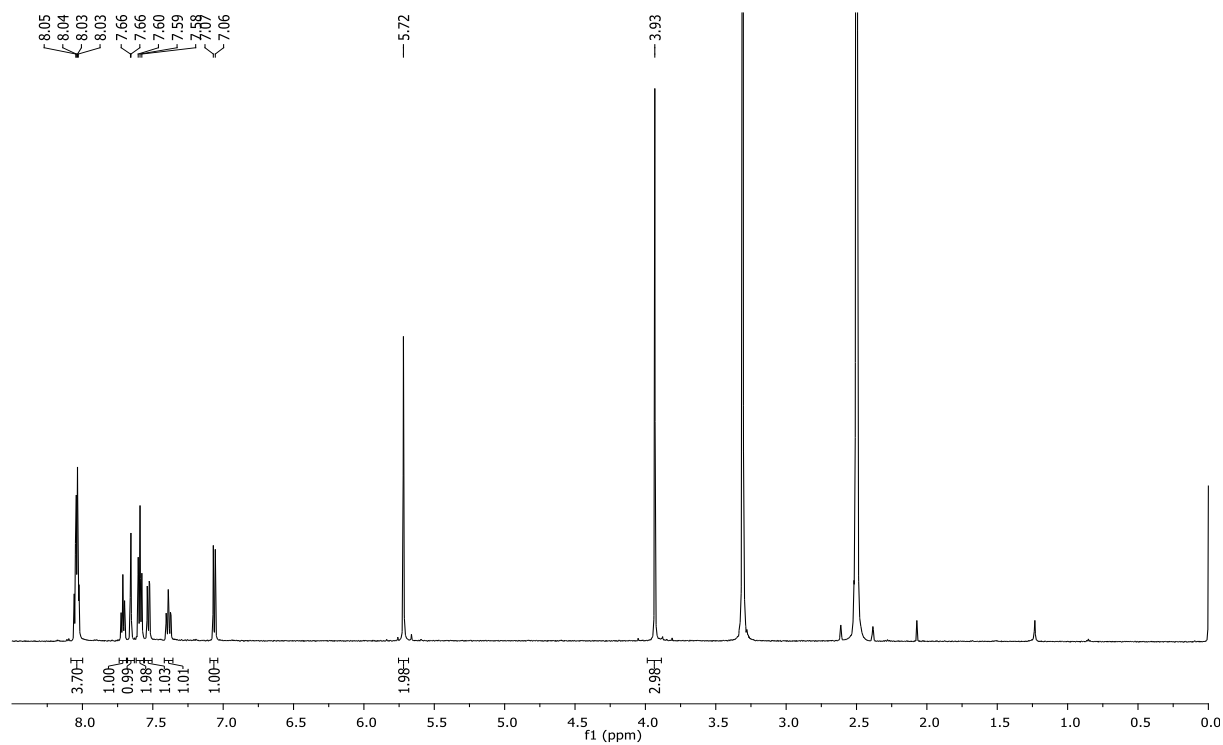

b)

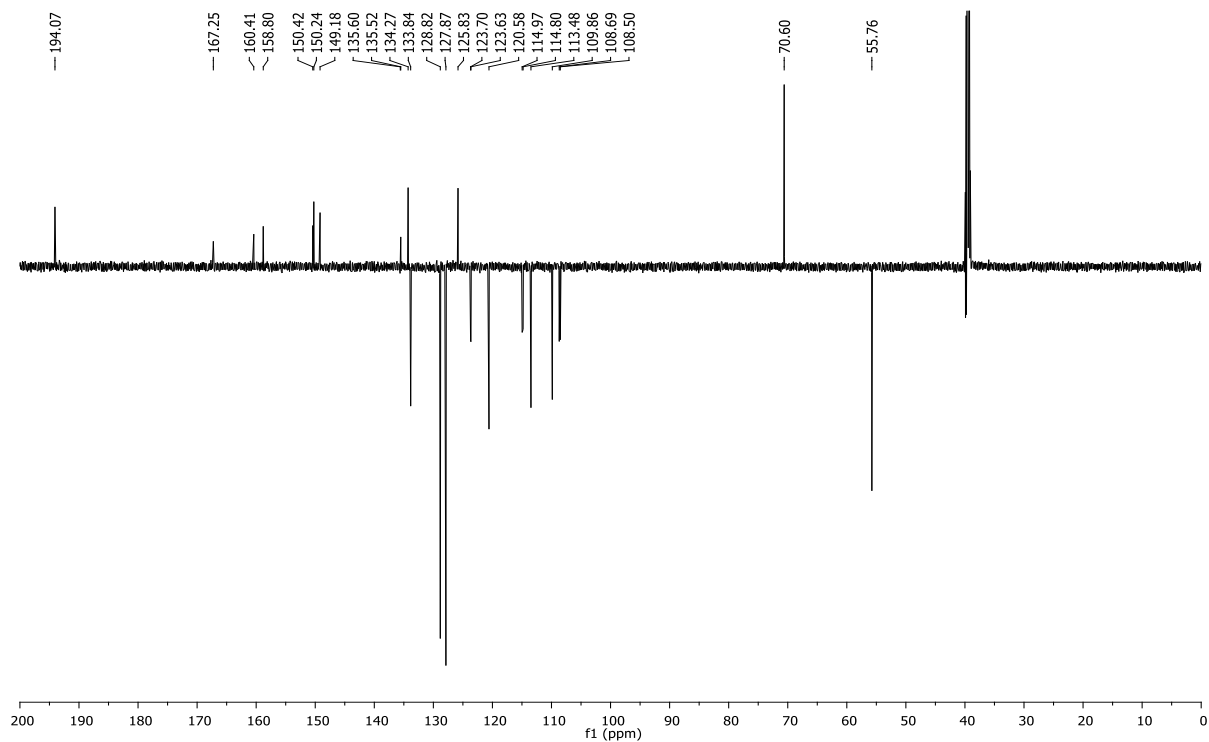

**Fig. S25** a)  $^1\text{H}$  NMR and b)  $^{13}\text{C}$  NMR of compd. **17a**

a)

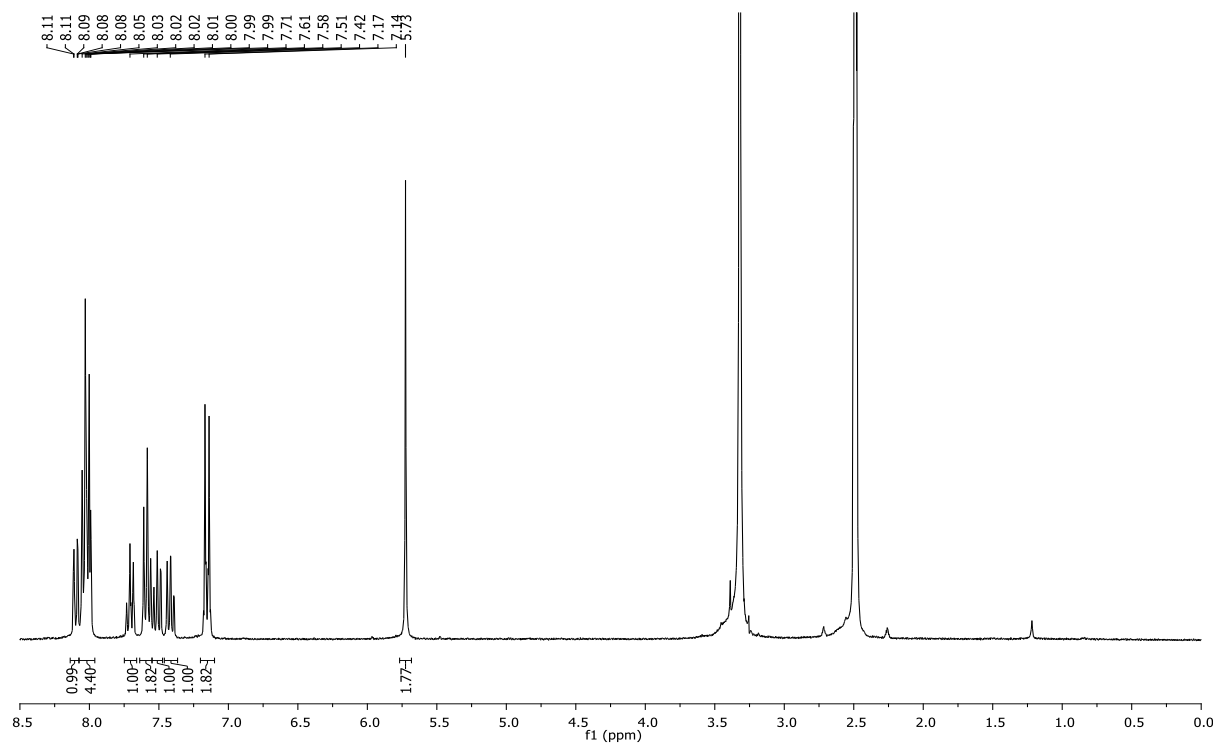

b)

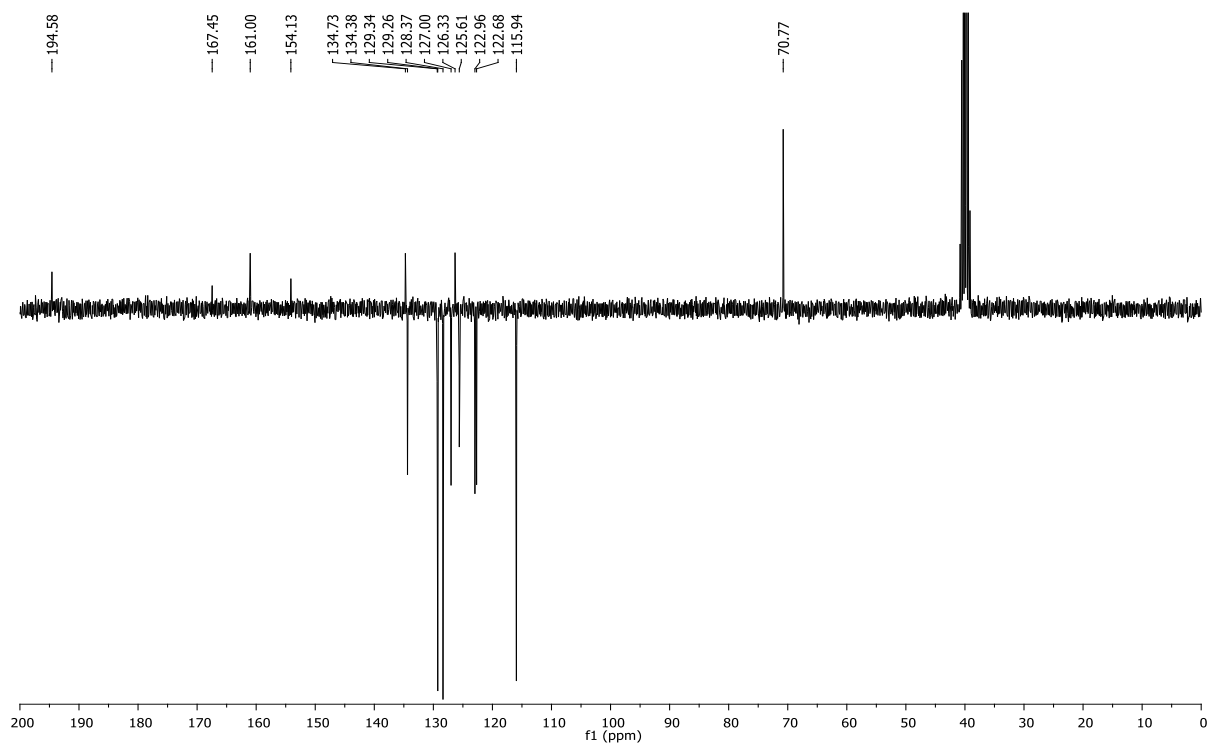

**Fig. S26** a)  $^1\text{H}$  NMR and b)  $^{13}\text{C}$  NMR of compd. **17b**

a)

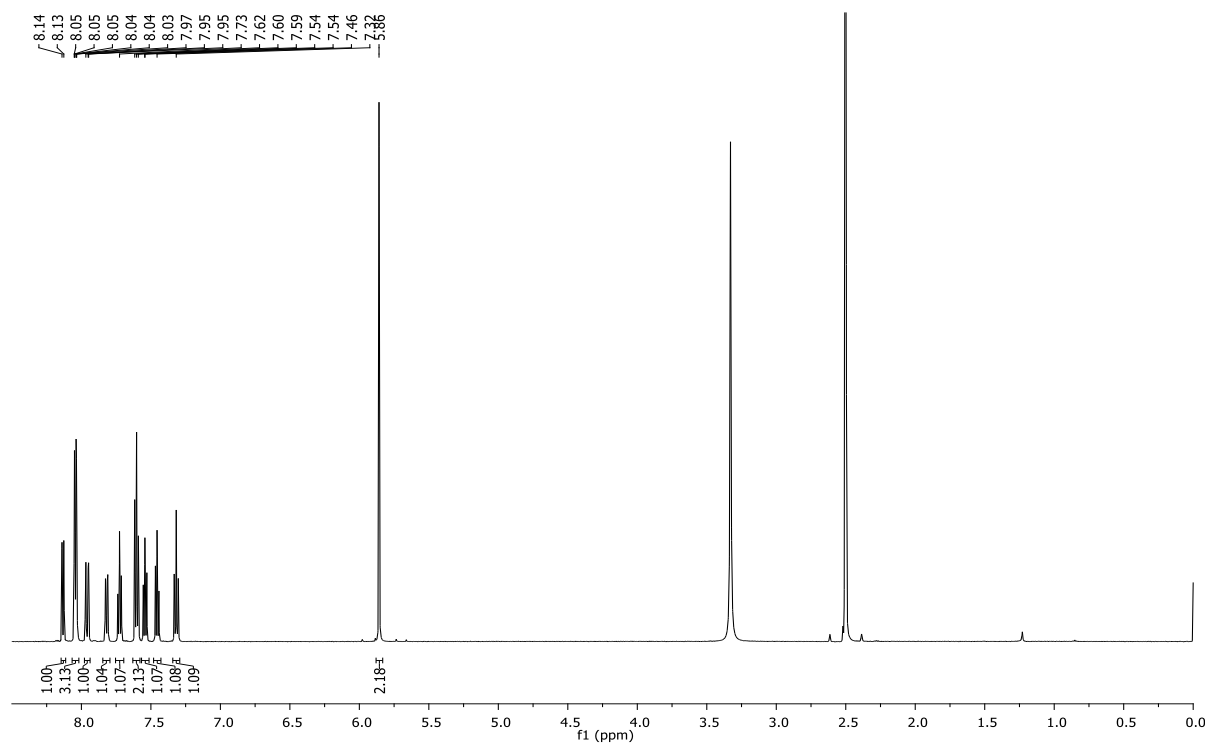

b)

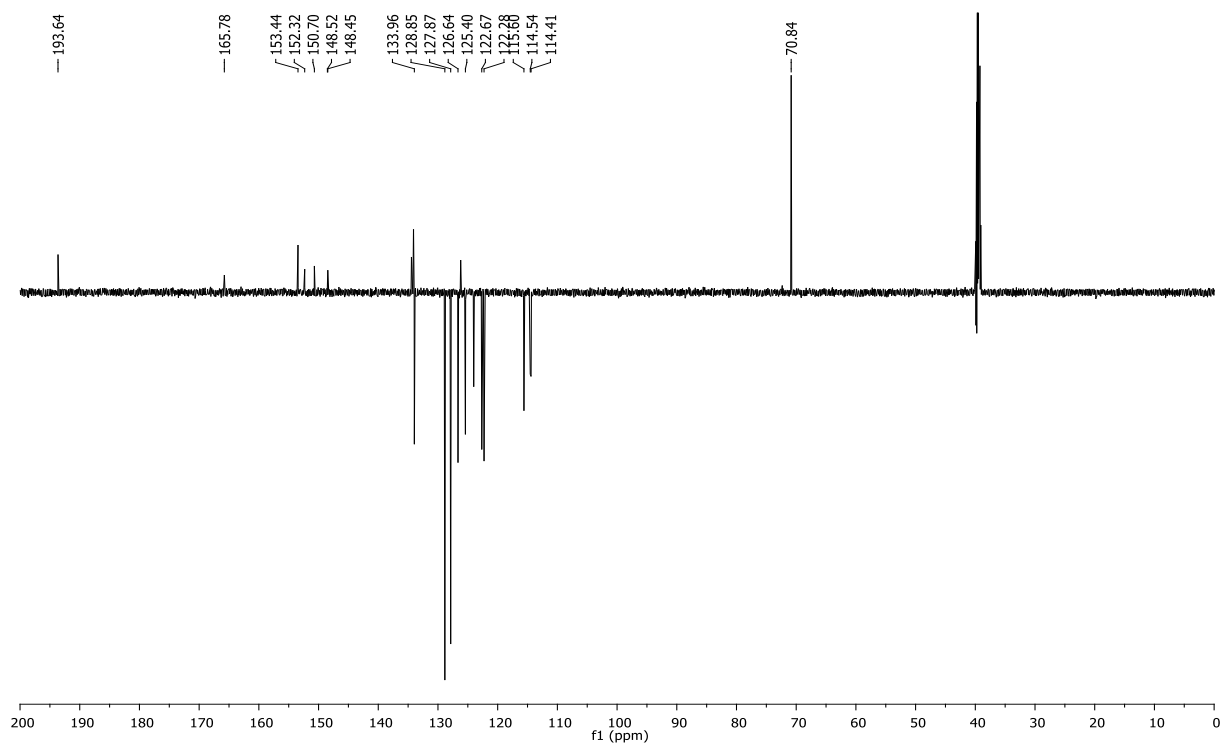

**Fig. S27** a)  $^1\text{H}$  NMR and b)  $^{13}\text{C}$  NMR of compd. **17c**

a)

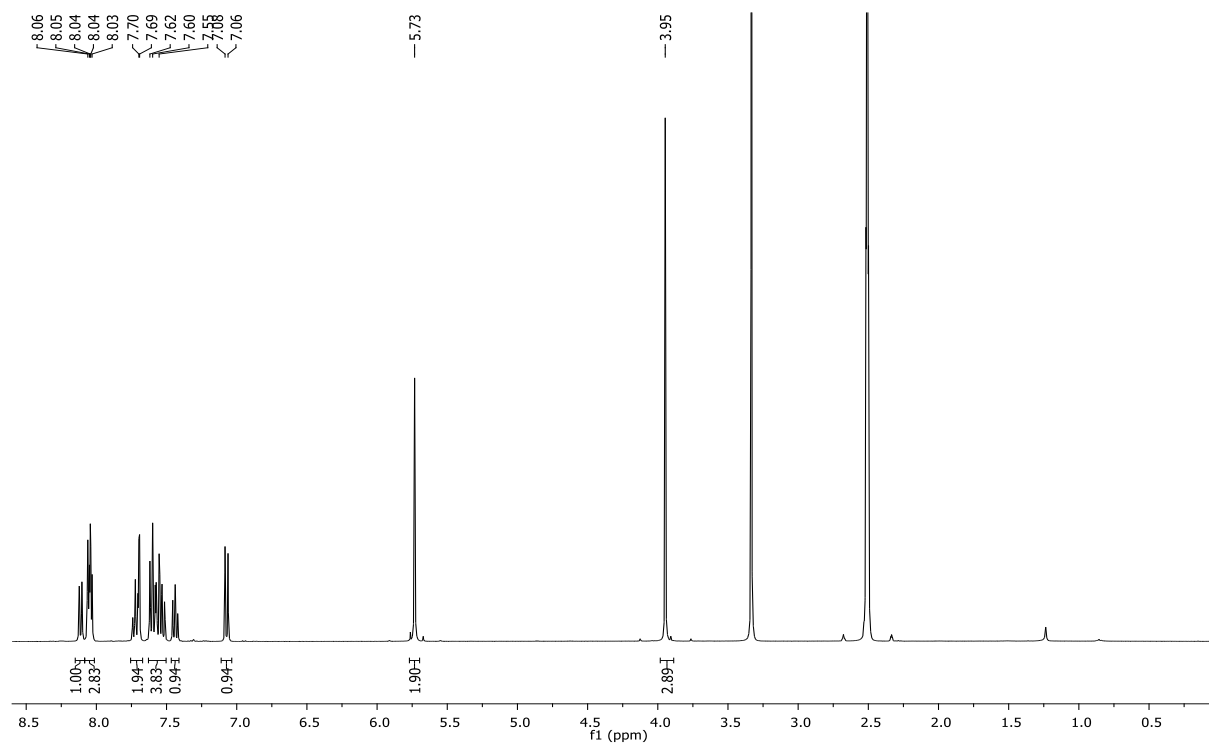

b)

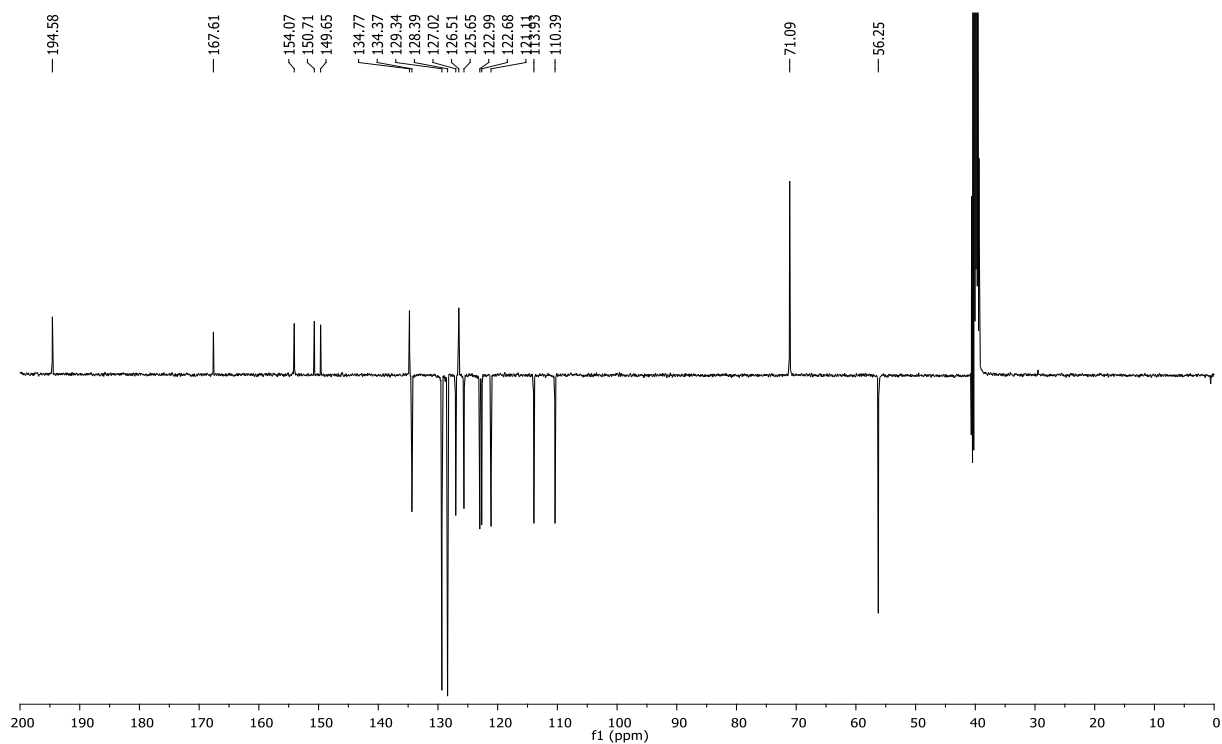



**Fig. S28** a)  $^1\text{H}$  NMR and b)  $^{13}\text{C}$  NMR of compd. **18a**

a)

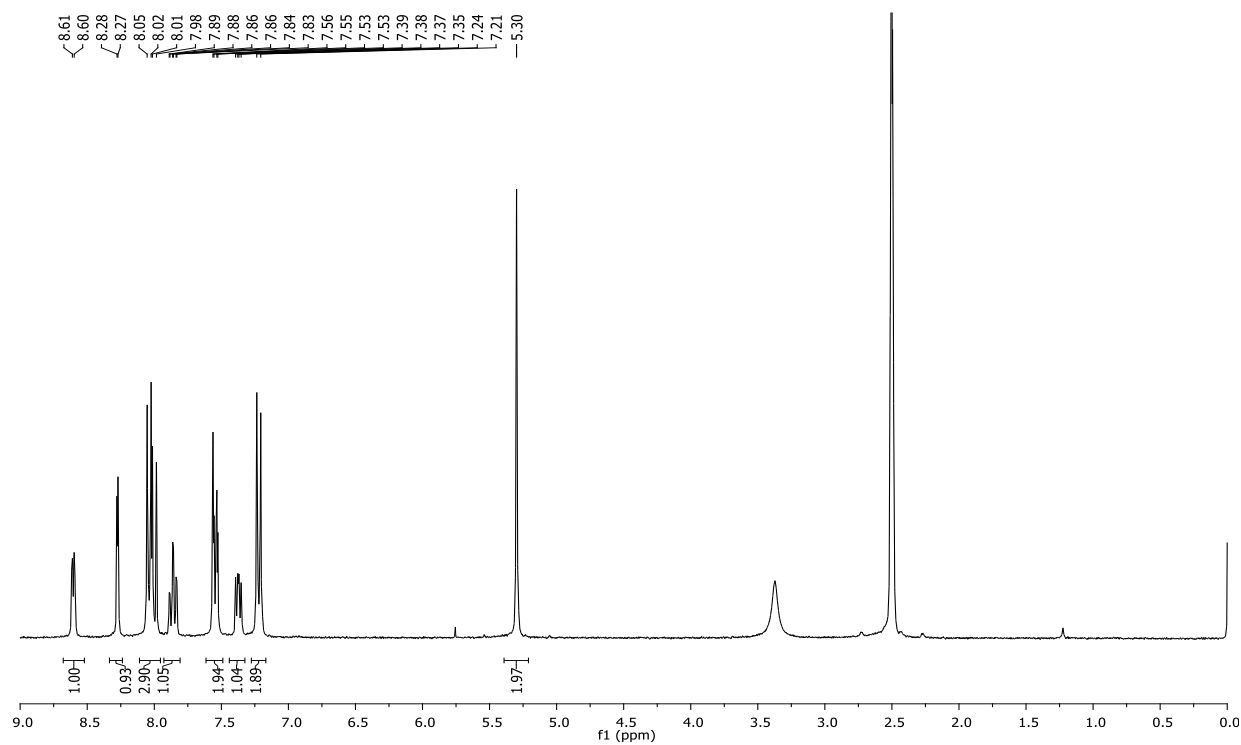

b)

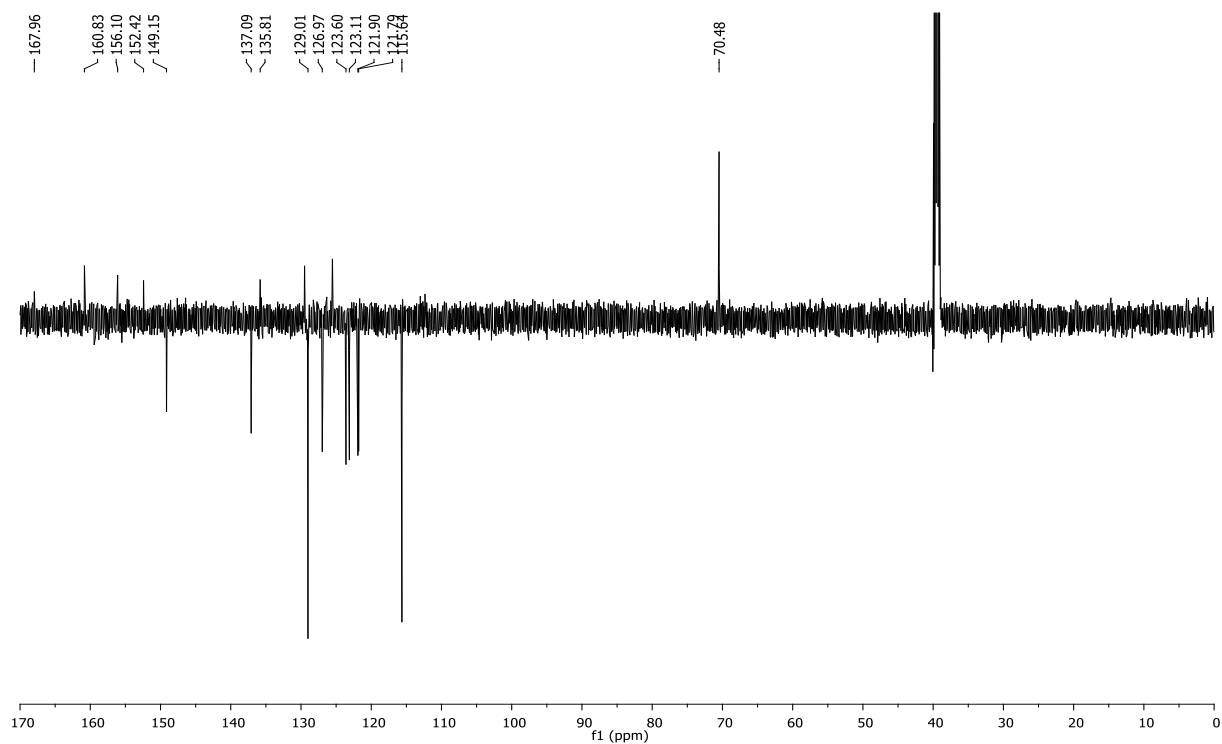

**Fig. S29** a)  $^1\text{H}$  NMR and b)  $^{13}\text{C}$  NMR of compd. **18b**

a)

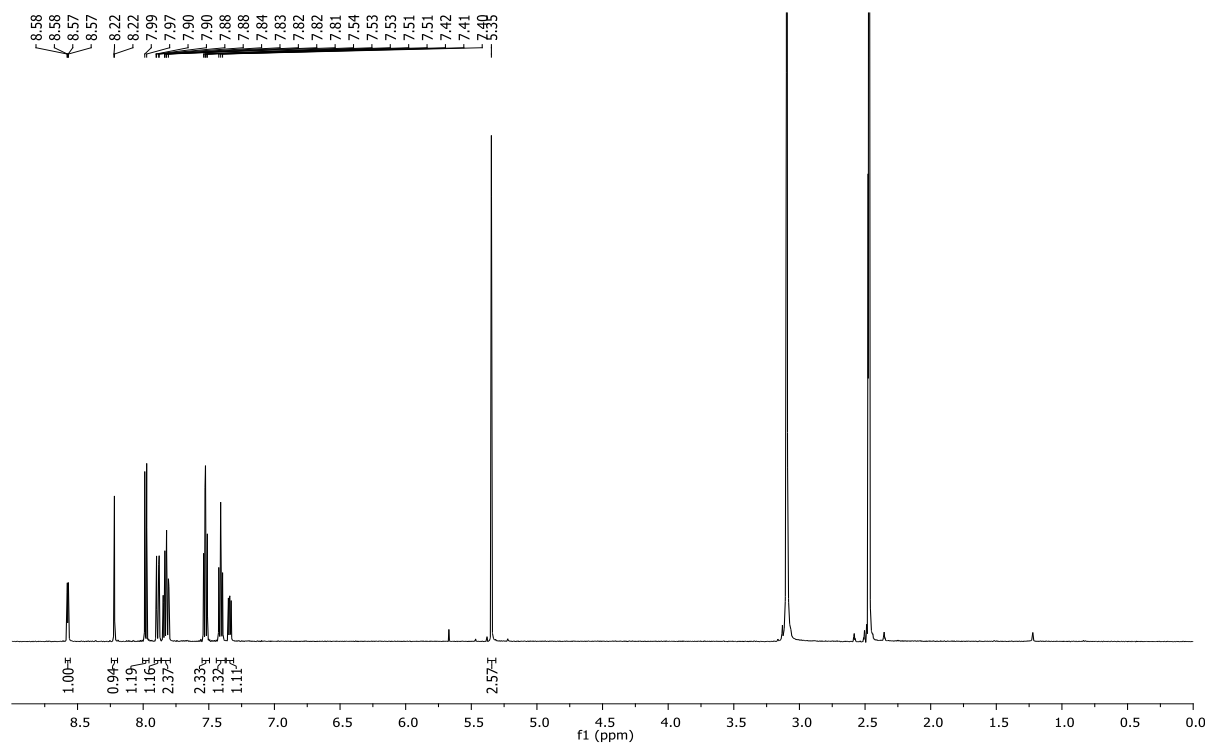

b)

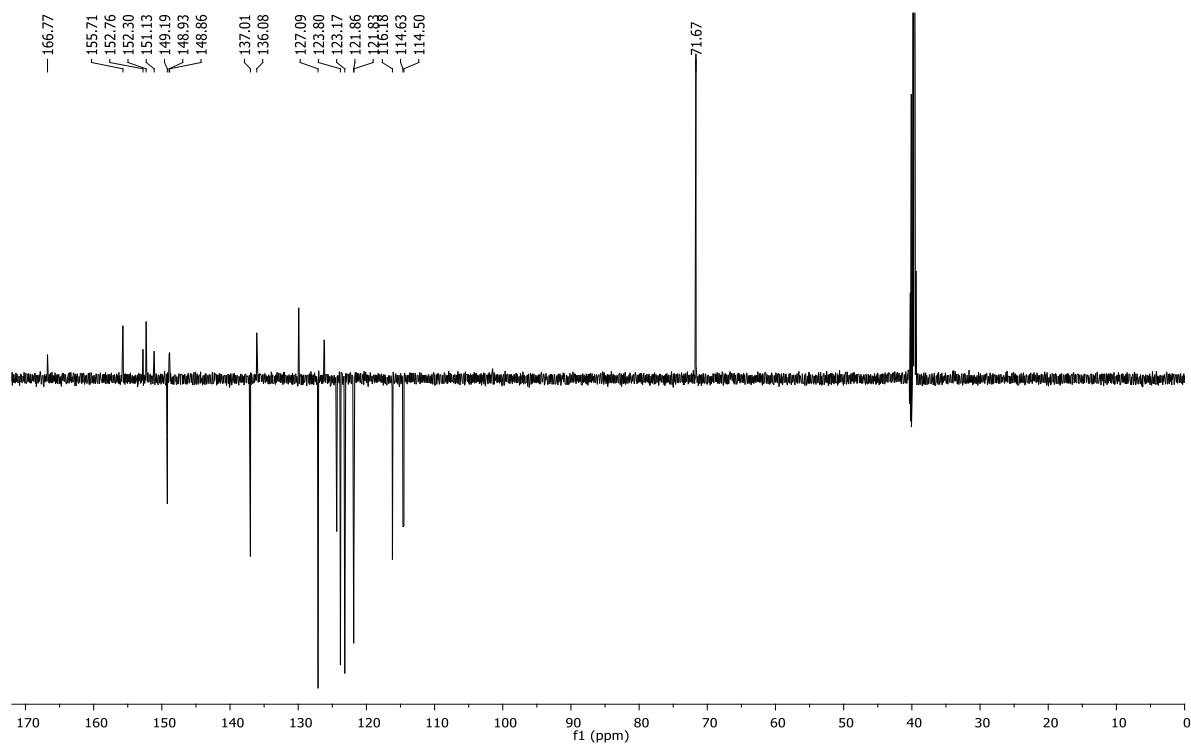

**Fig. S30** a)  $^1\text{H}$  NMR and b)  $^{13}\text{C}$  NMR of compd. **18c**

a)

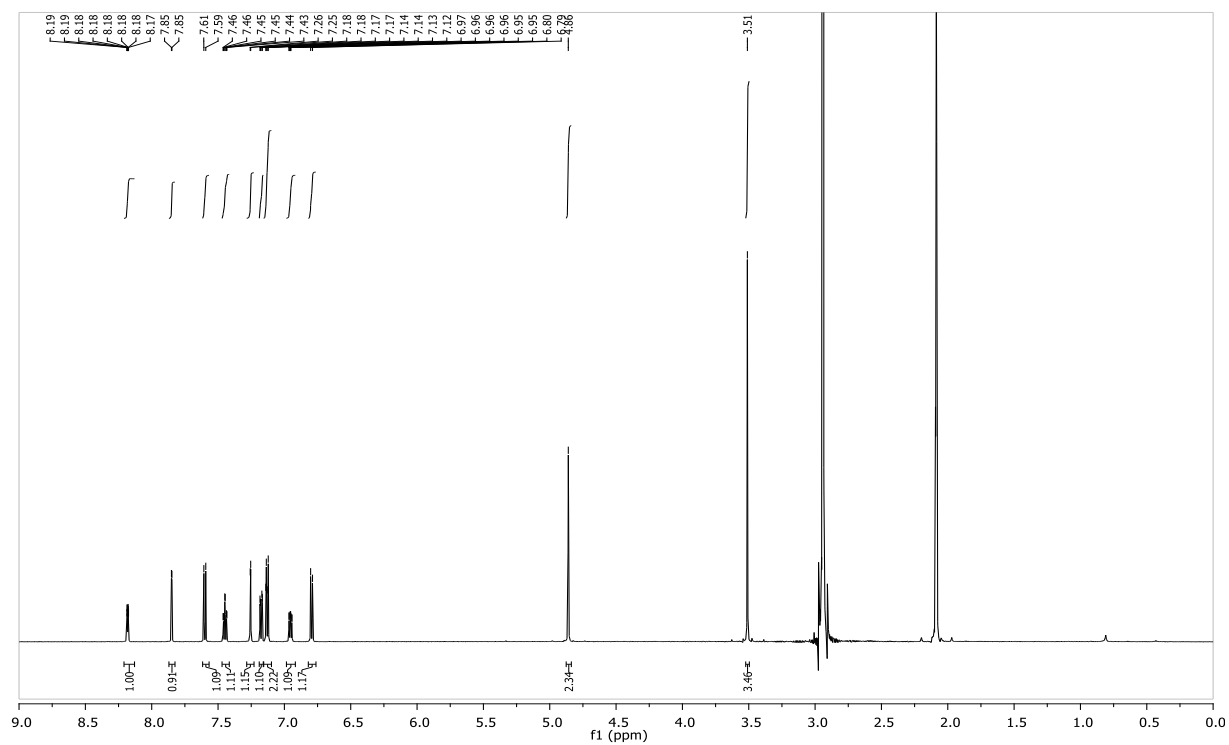

b)

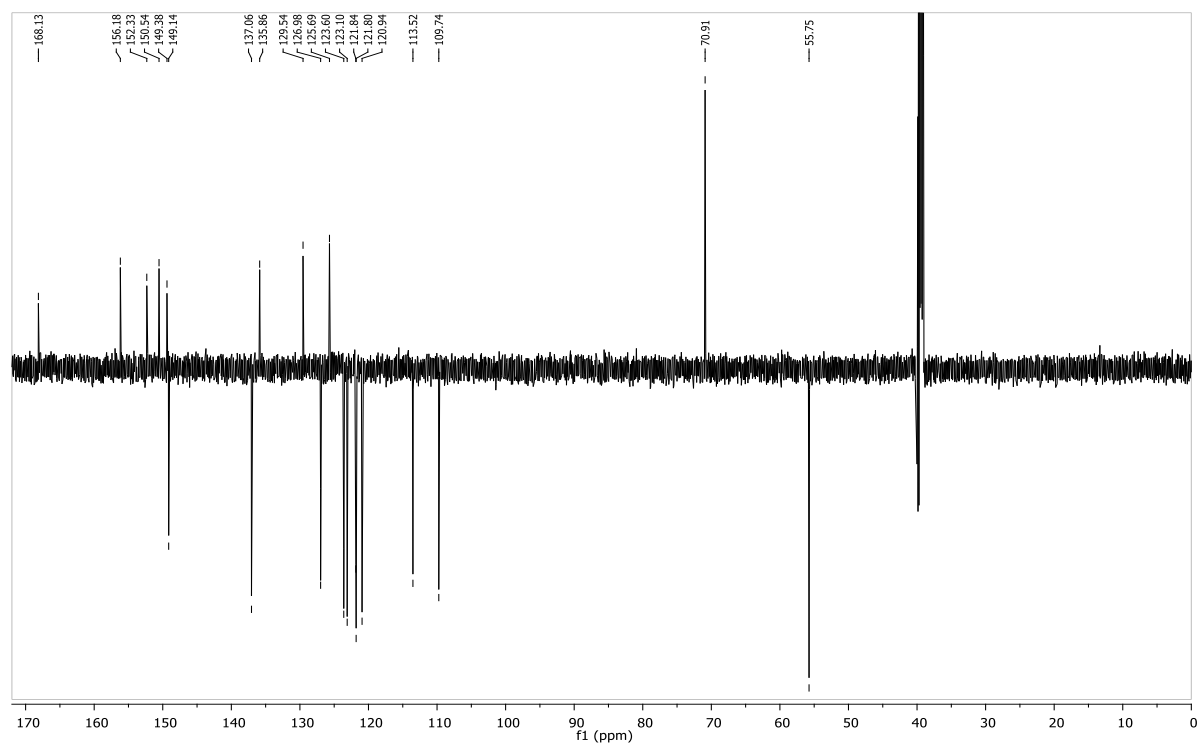

**Fig. S31** a)  $^1\text{H}$  NMR and b)  $^{13}\text{C}$  NMR of compd. **19a**

a)

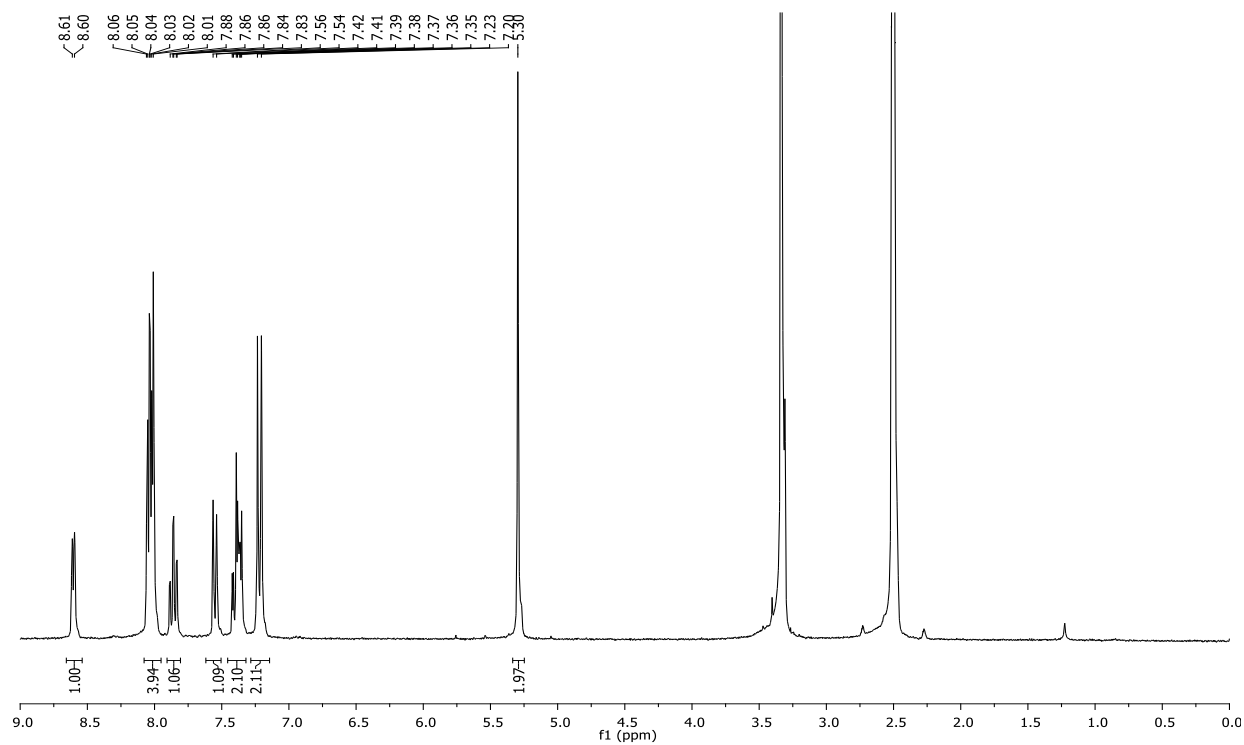

b)

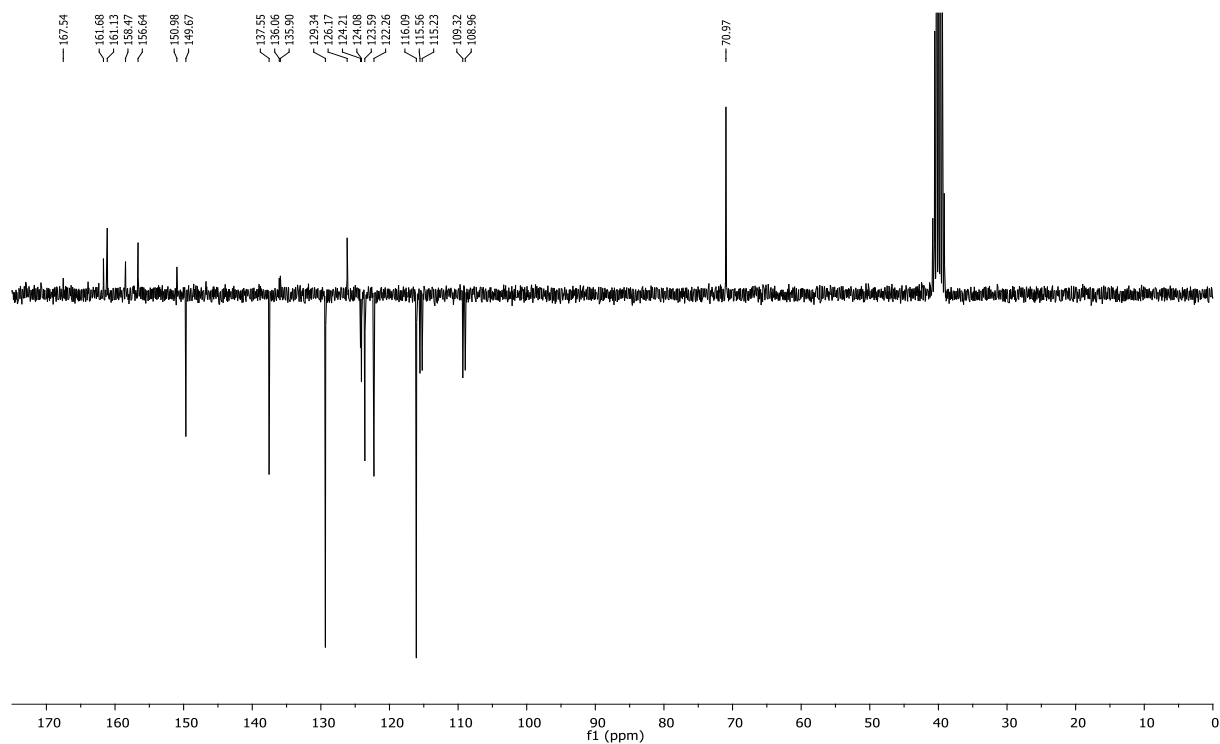

**Fig. S32** a)  $^1\text{H}$  NMR and b)  $^{13}\text{C}$  NMR of compd. **19b**

a)

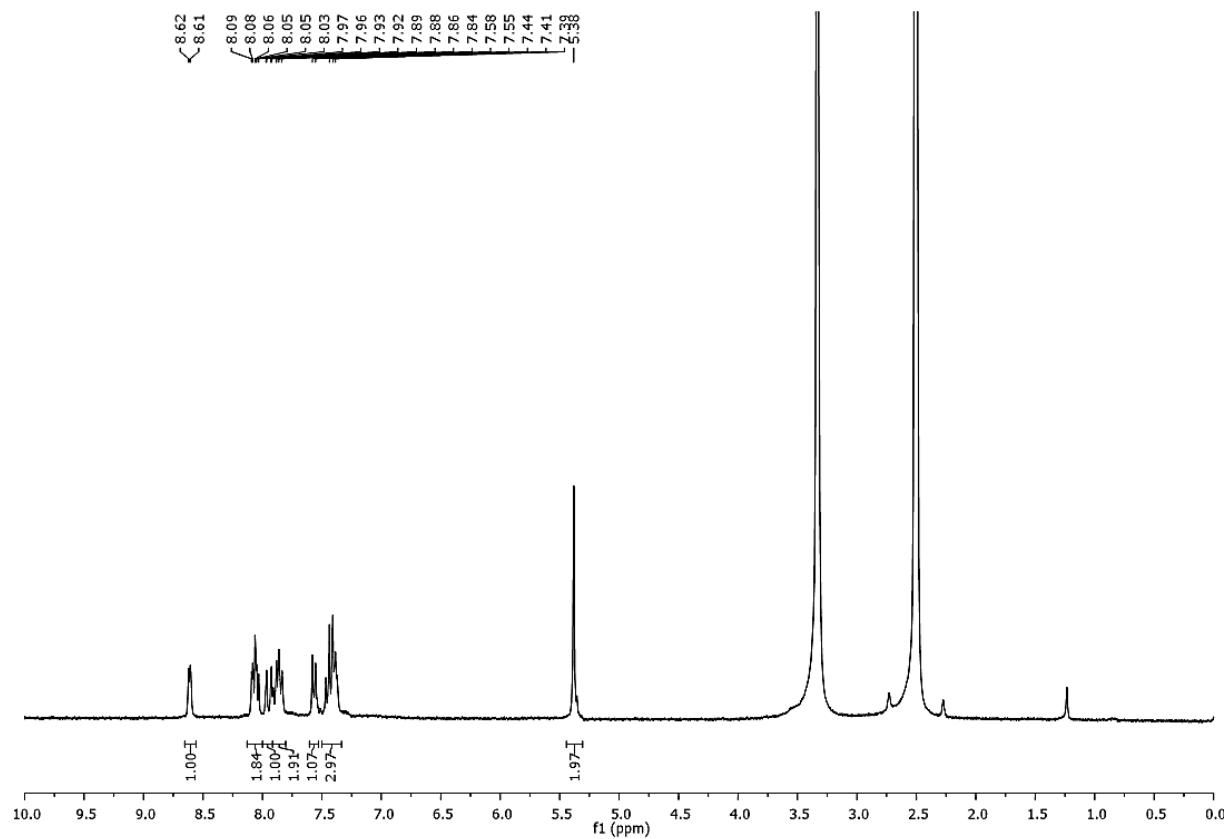

b)

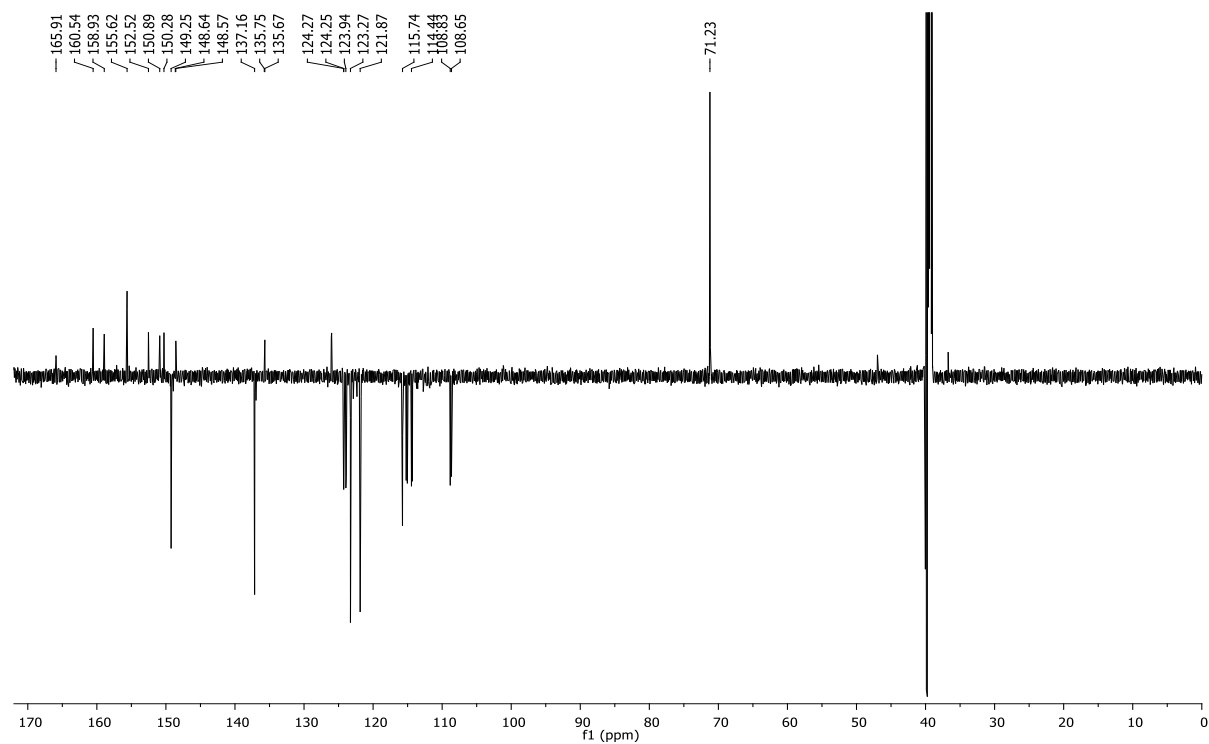

**Fig. S33** a)  $^1\text{H}$  NMR and b)  $^{13}\text{C}$  NMR of compd. **19c**

a)

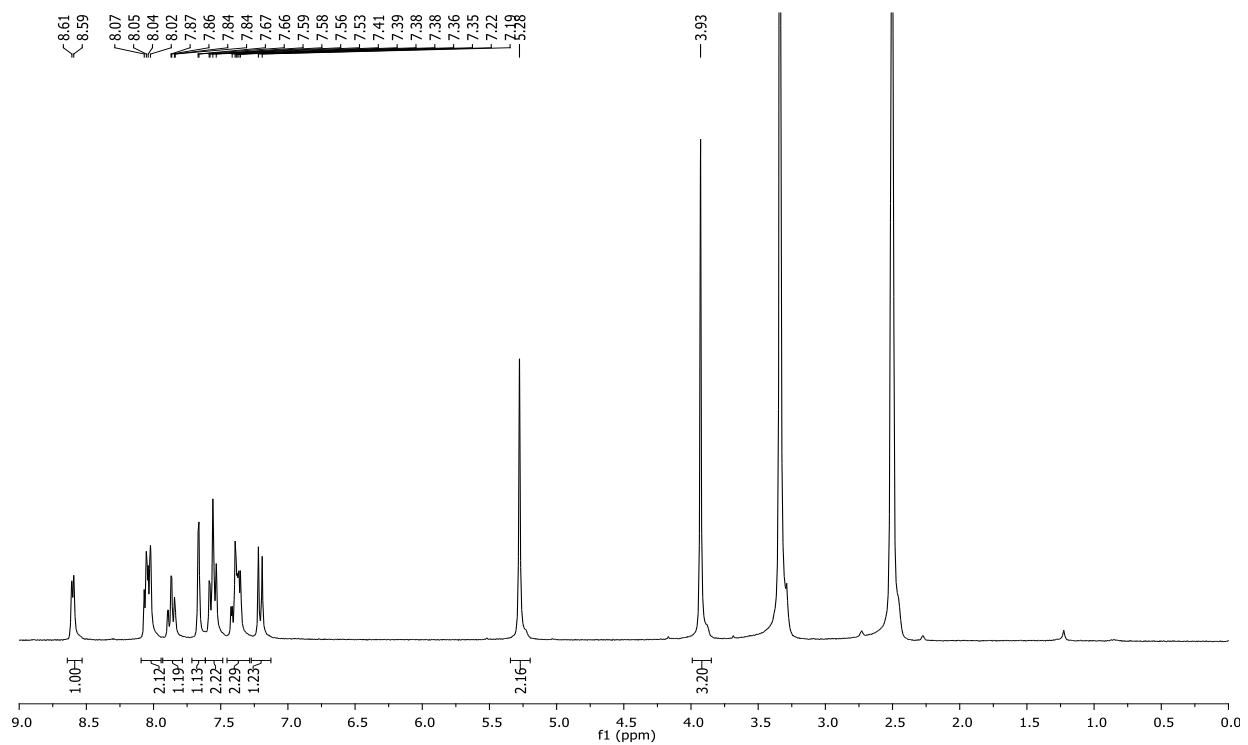

b)

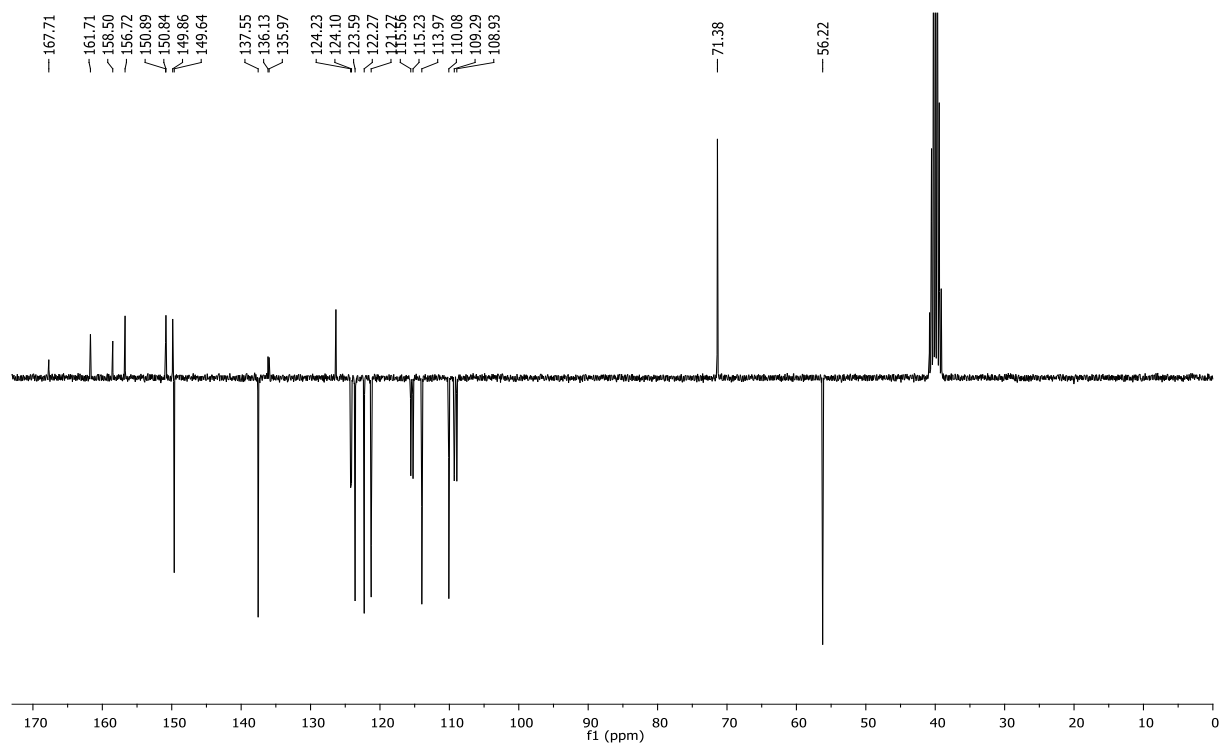

**Fig. S34** a)  $^1\text{H}$  NMR and b)  $^{13}\text{C}$  NMR of compd. **20a**

a)

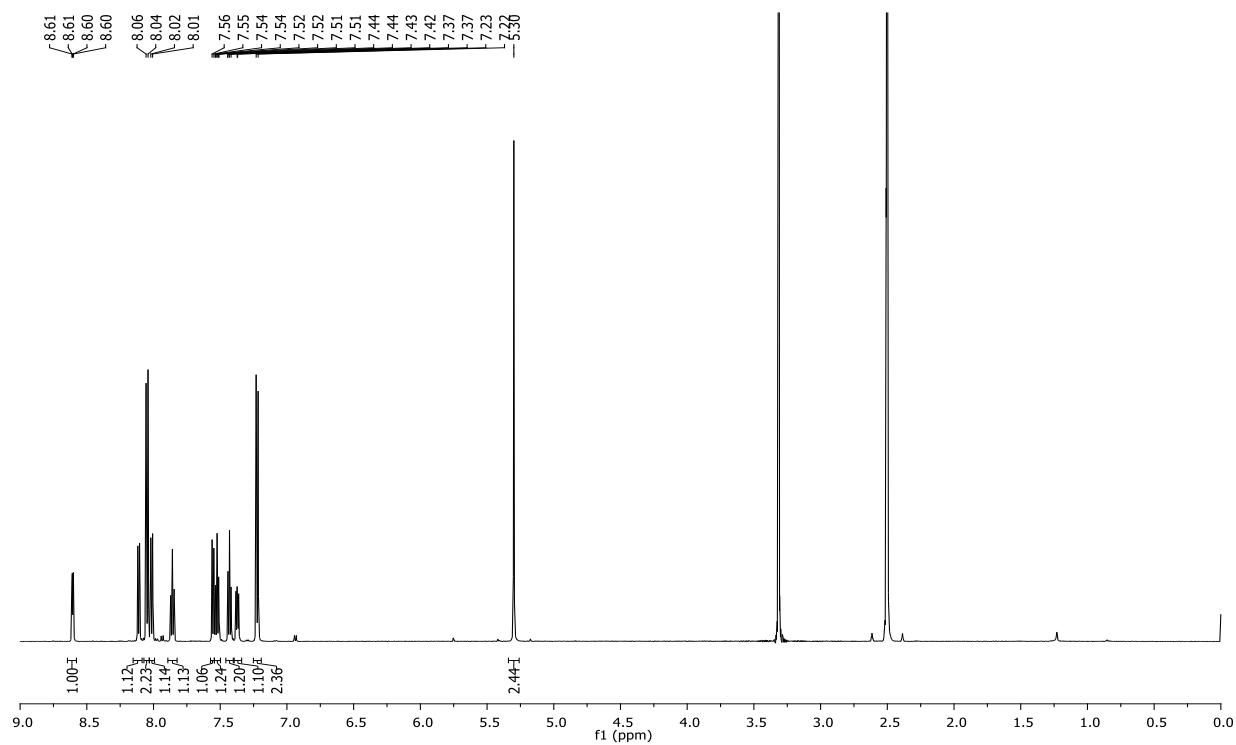

b)

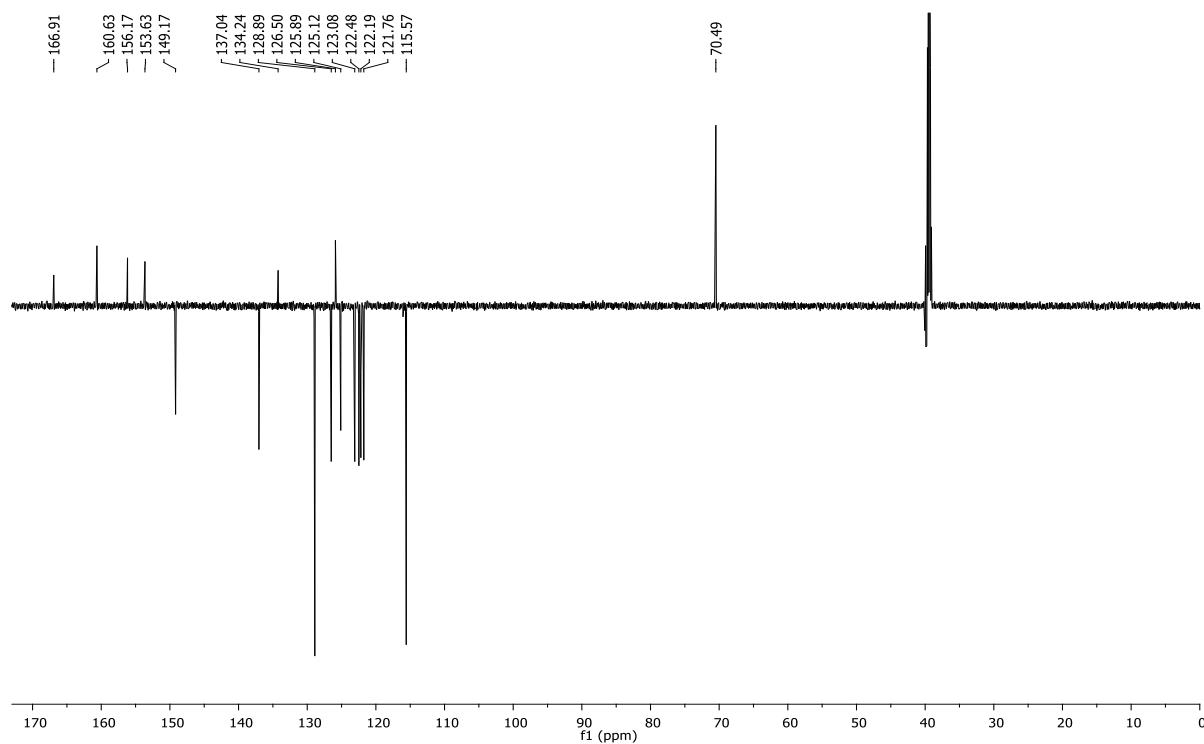

**Fig. S35** a)  $^1\text{H}$  NMR and b)  $^{13}\text{C}$  NMR of compd. **20b**

a)

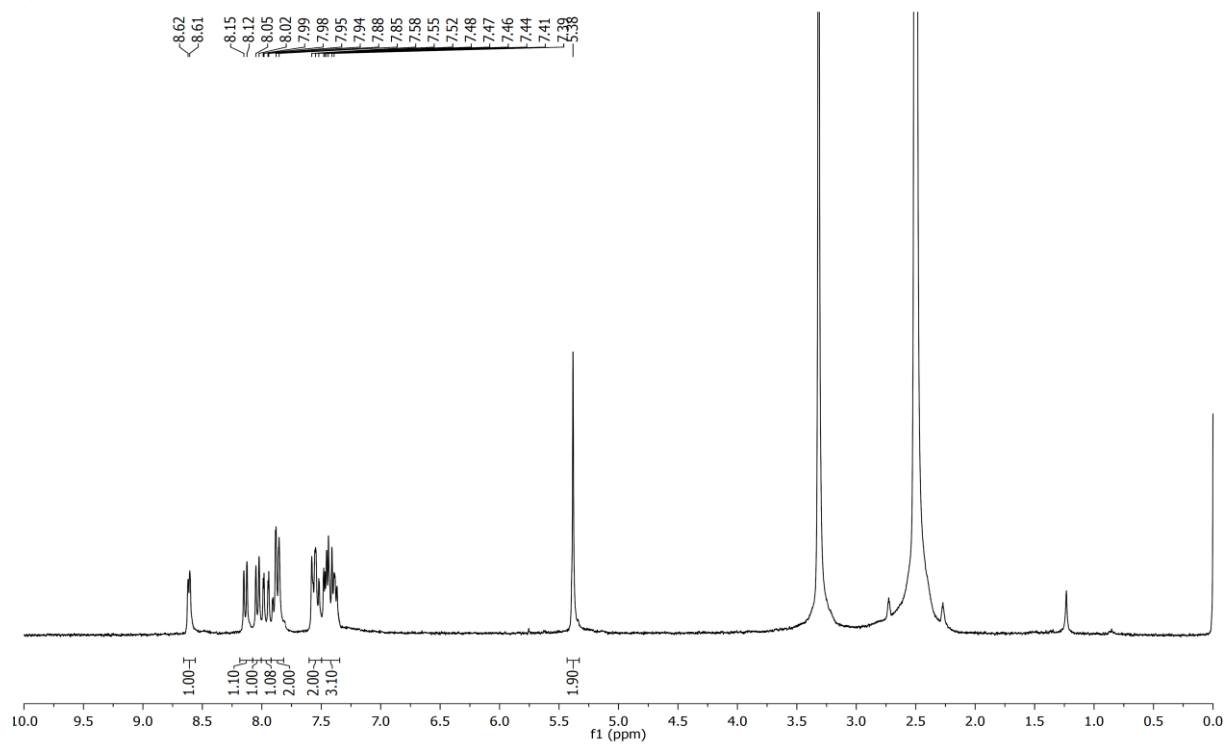

b)

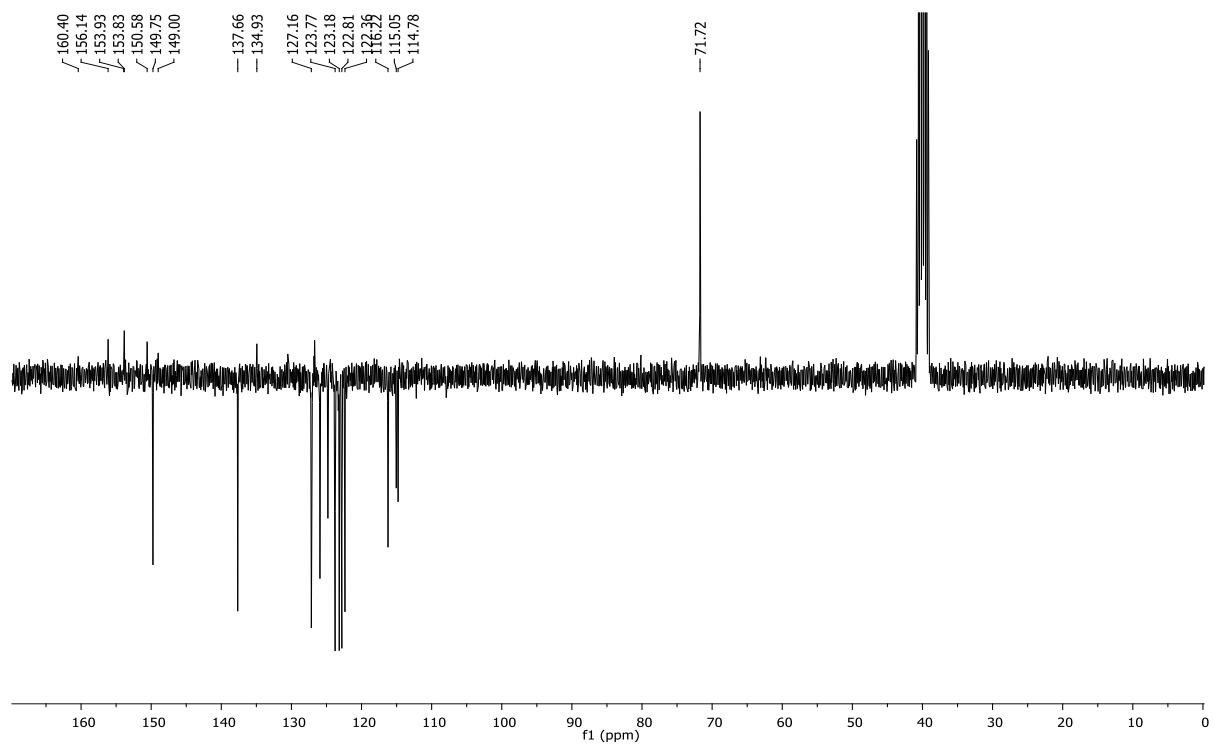



**Fig. S36** a)  $^1\text{H}$  NMR and b)  $^{13}\text{C}$  NMR of compd. **20c**

a)

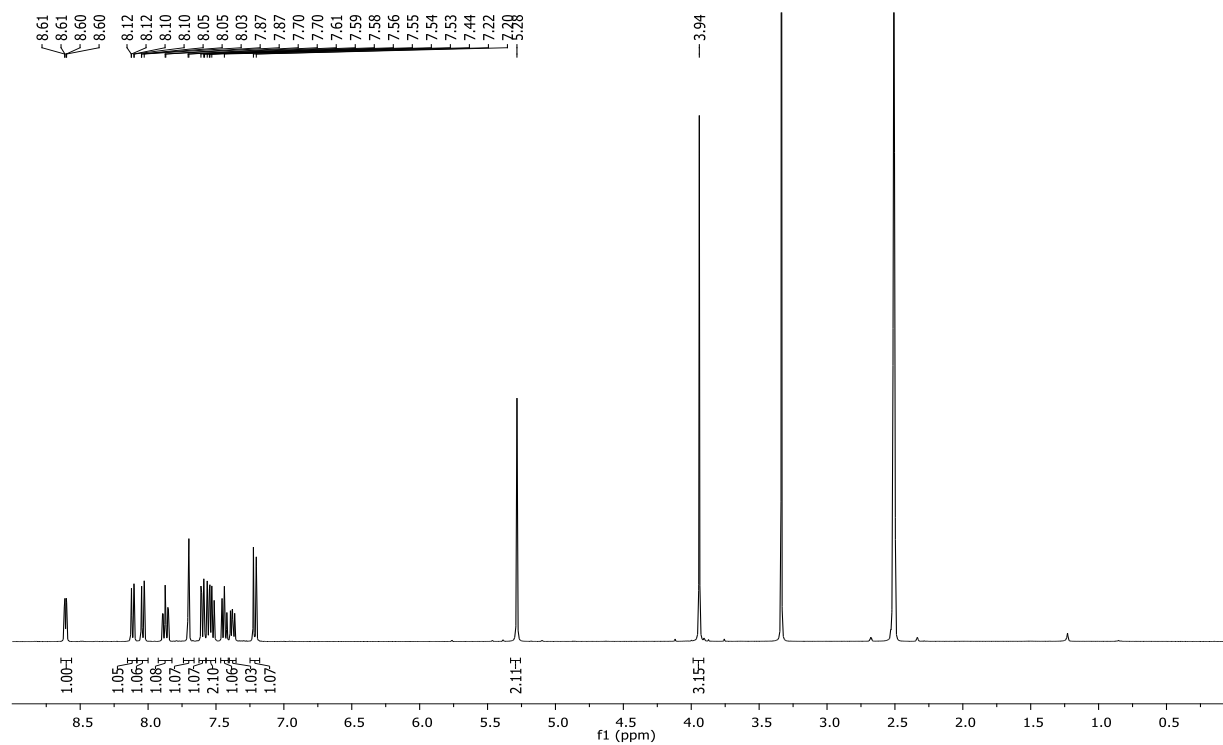

b)

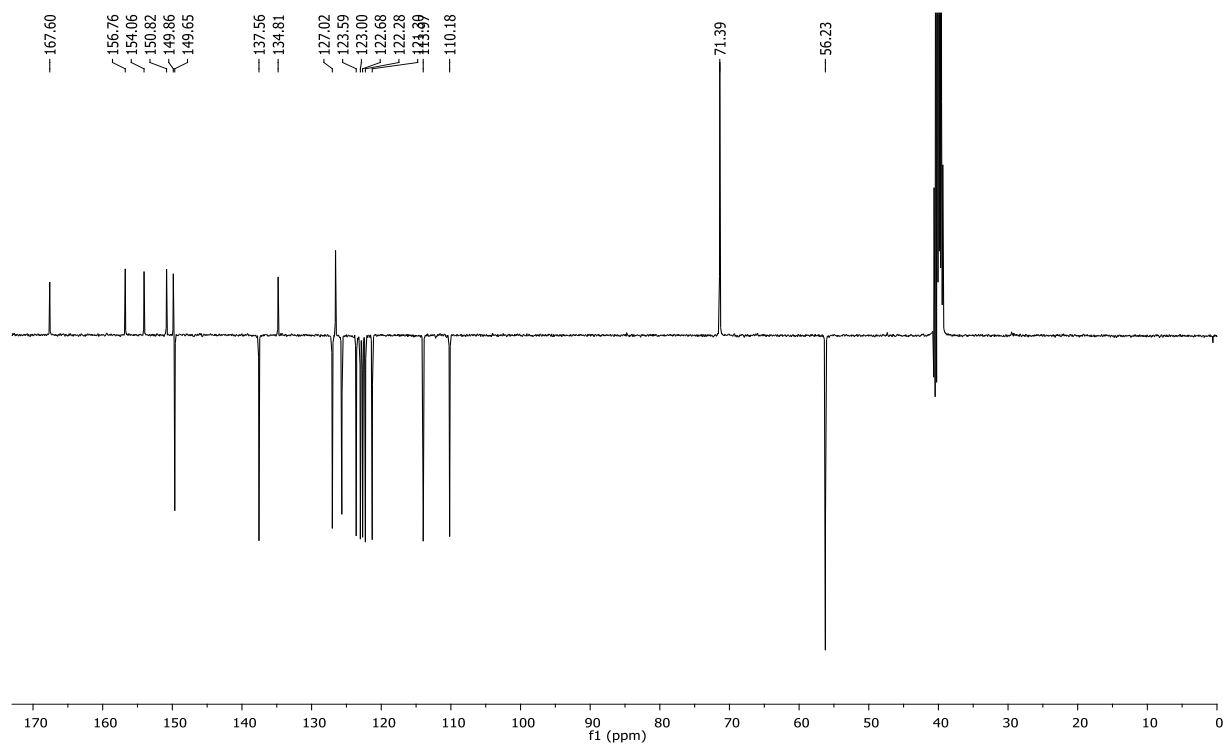

**Fig. S37** a)  $^1\text{H}$  NMR and b)  $^{13}\text{C}$  NMR of compd. **21a**

a)

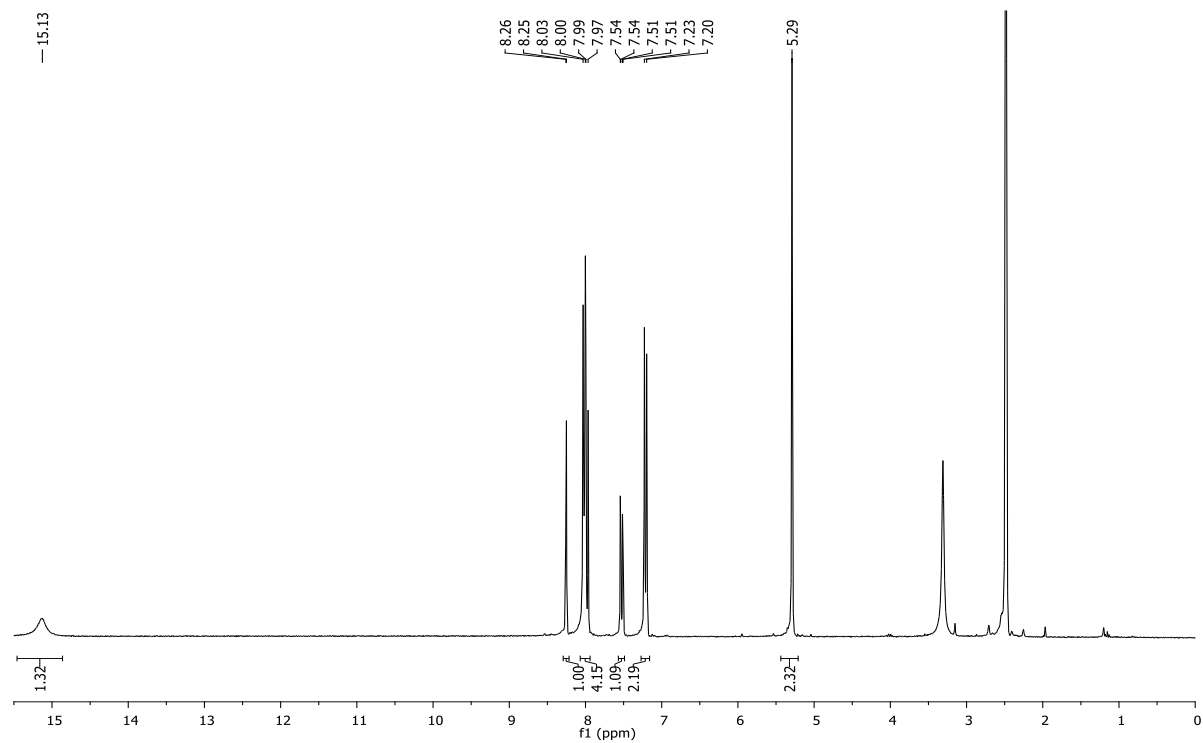

b)

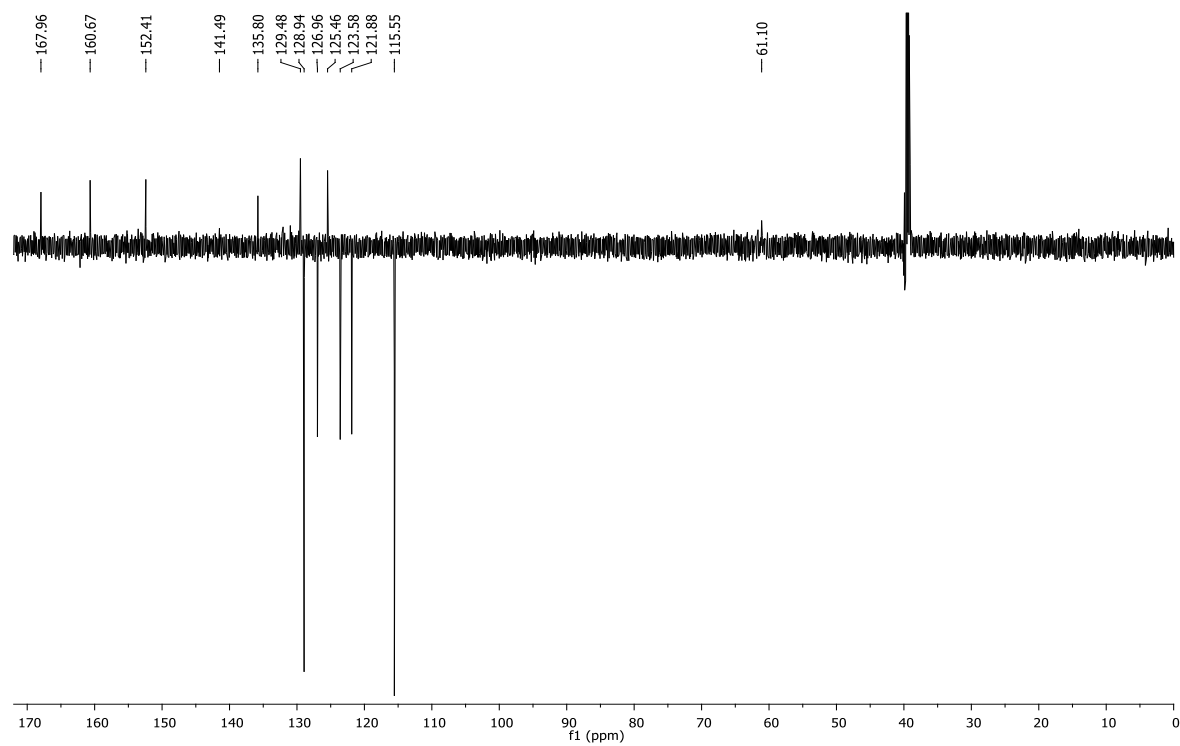

**Fig. S38** a)  $^1\text{H}$  NMR and b)  $^{13}\text{C}$  NMR of compd. **21b**

a)

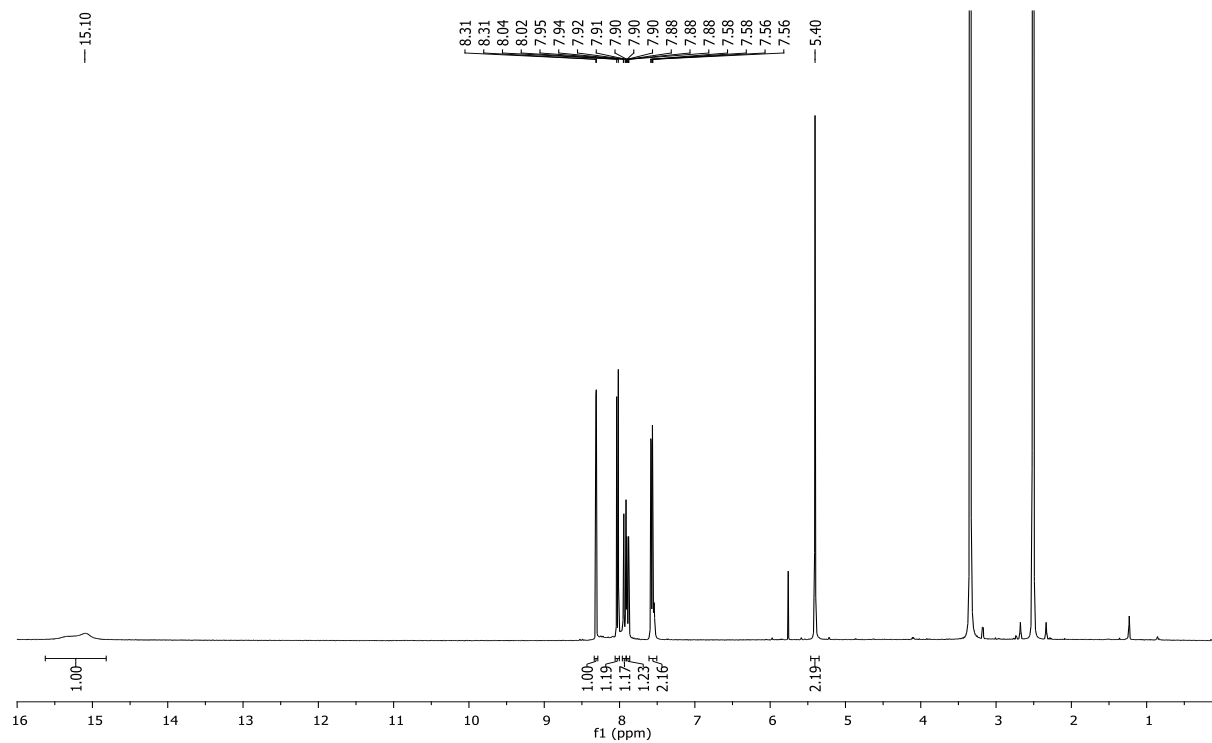

b)

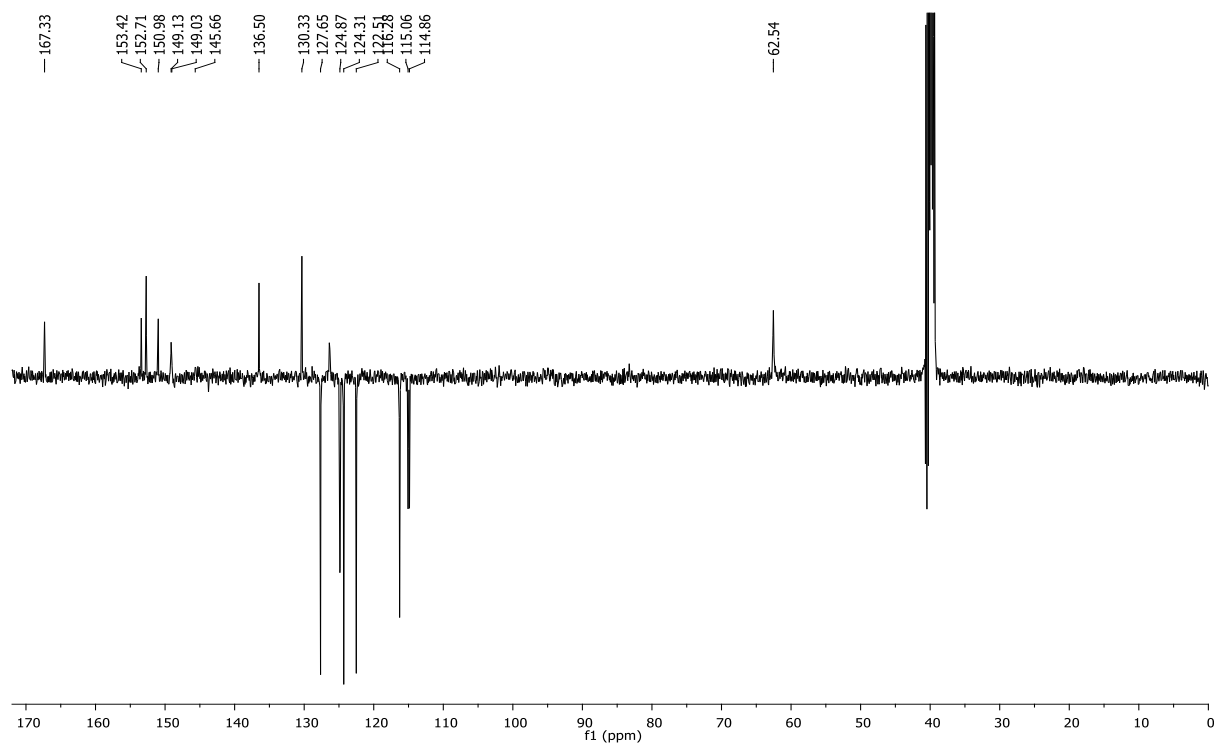

**Fig. S39** a)  $^1\text{H}$  NMR and b)  $^{13}\text{C}$  NMR of compd. **21c**

a)

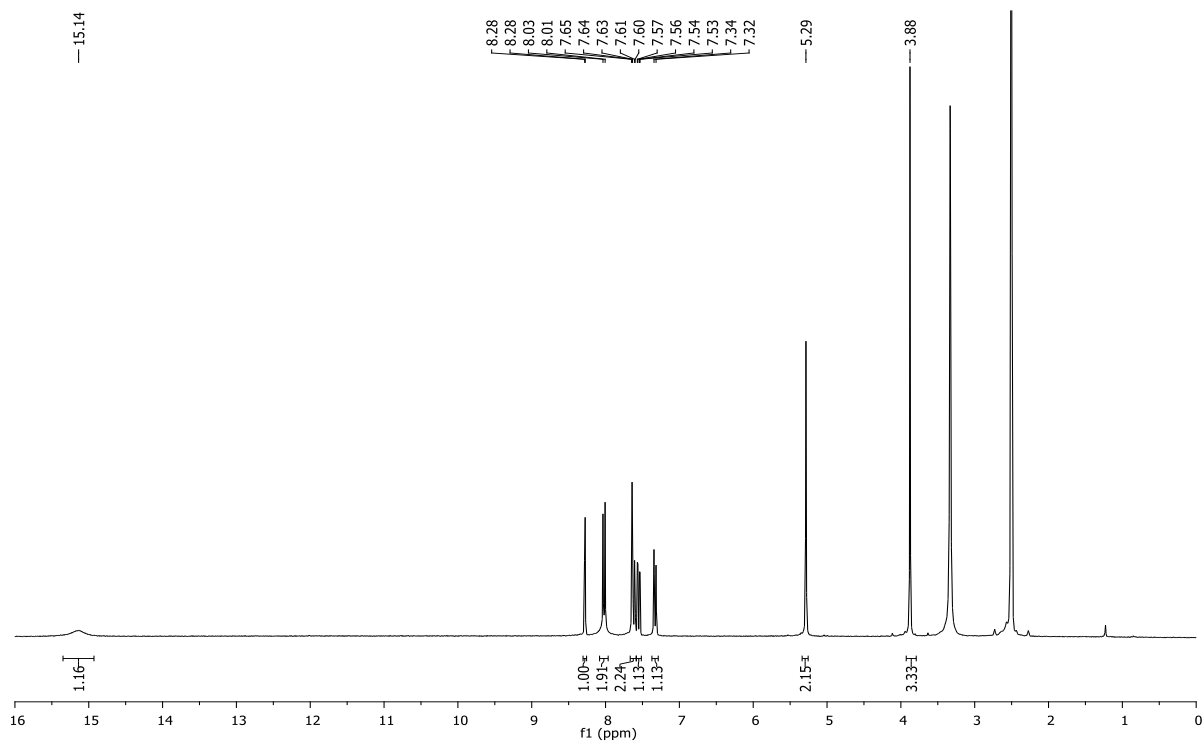

b)

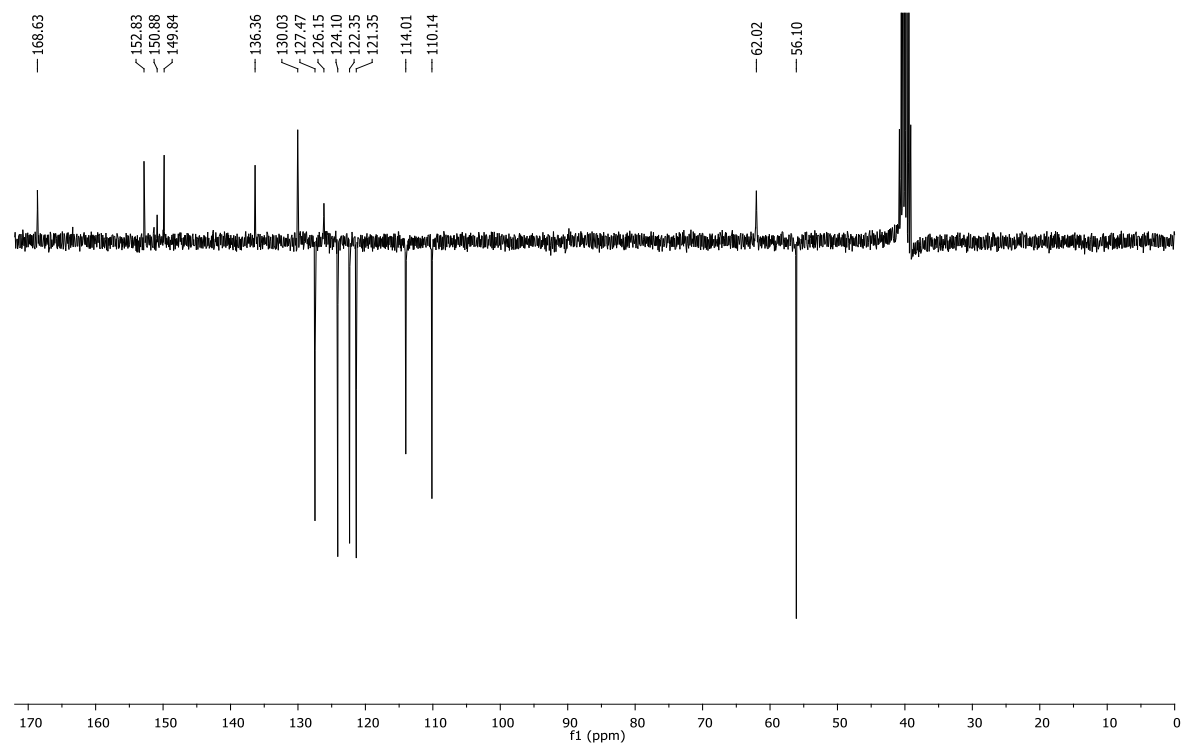

**Fig. S40** a)  $^1\text{H}$  NMR and b)  $^{13}\text{C}$  NMR of compd. **22a**

a)

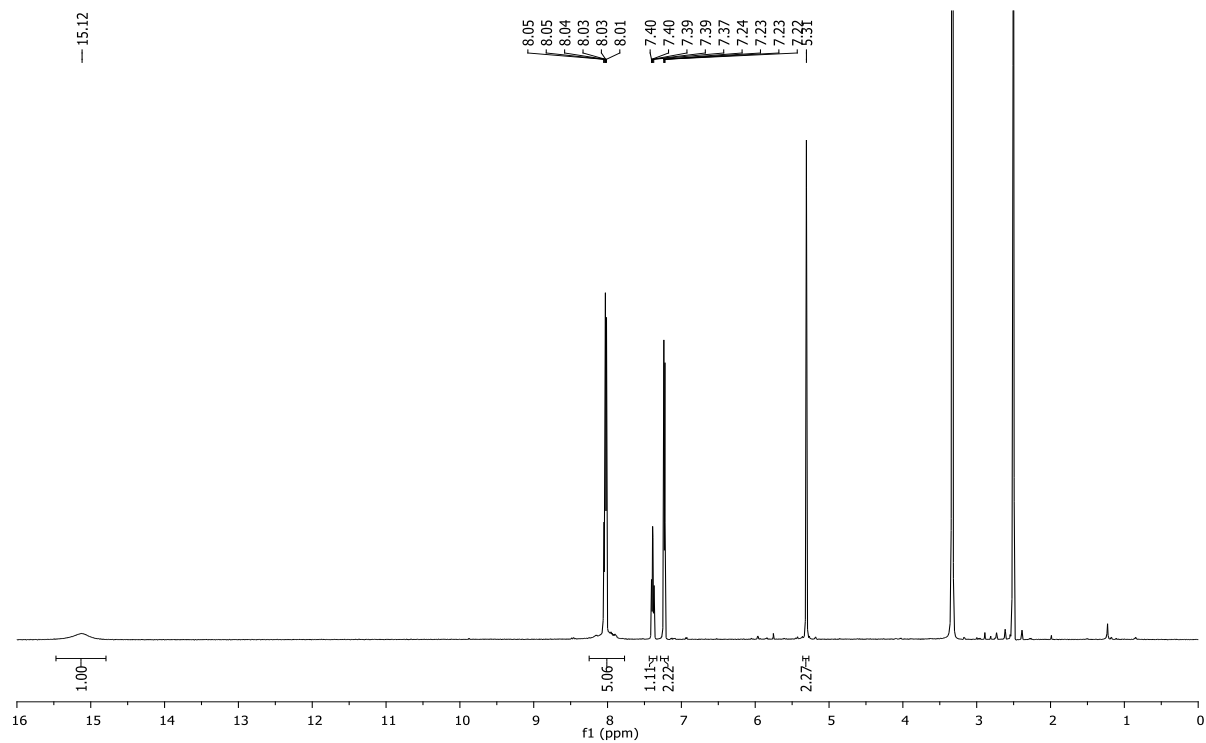

b)

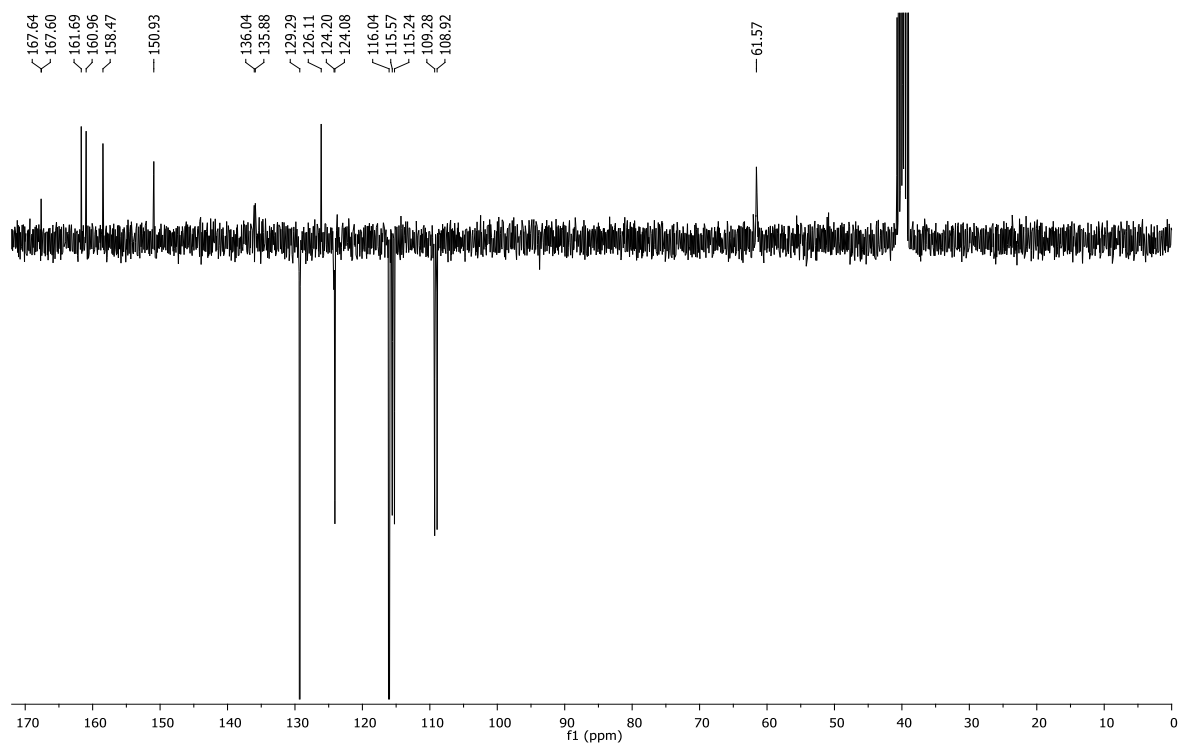

**Fig. S41** a)  $^1\text{H}$  NMR and b)  $^{13}\text{C}$  NMR of compd. **22b**

a)

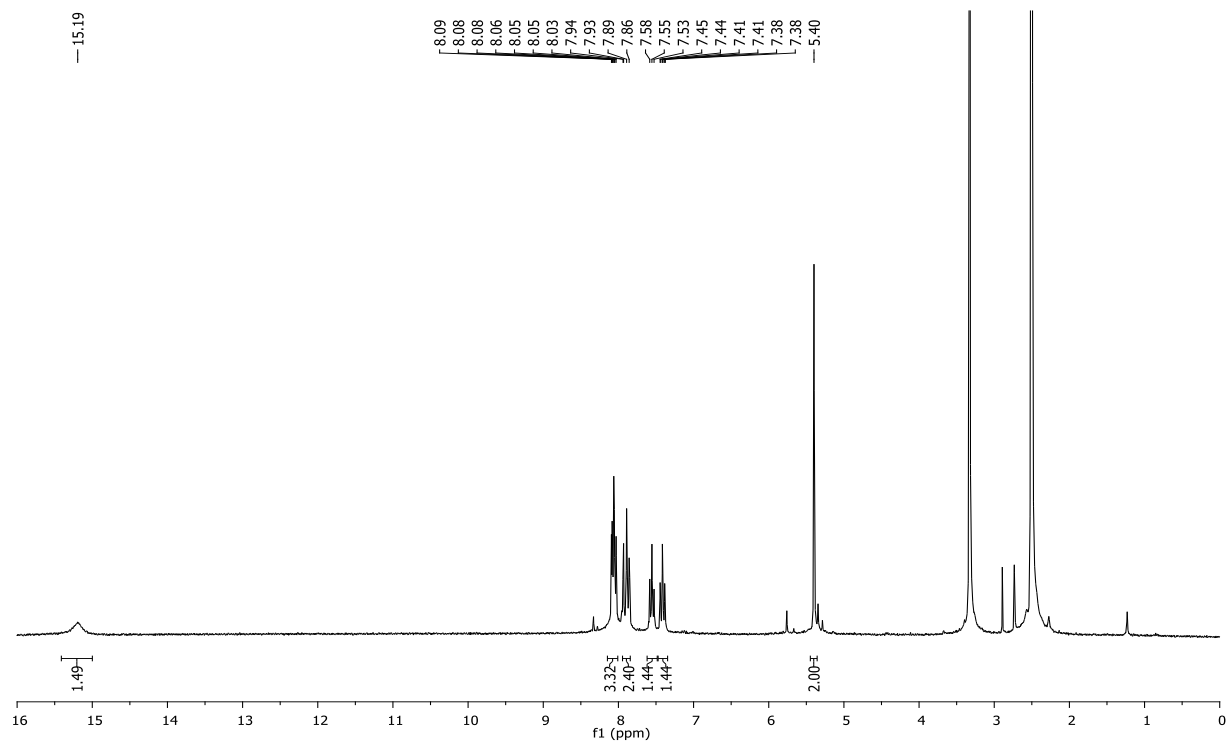

b)

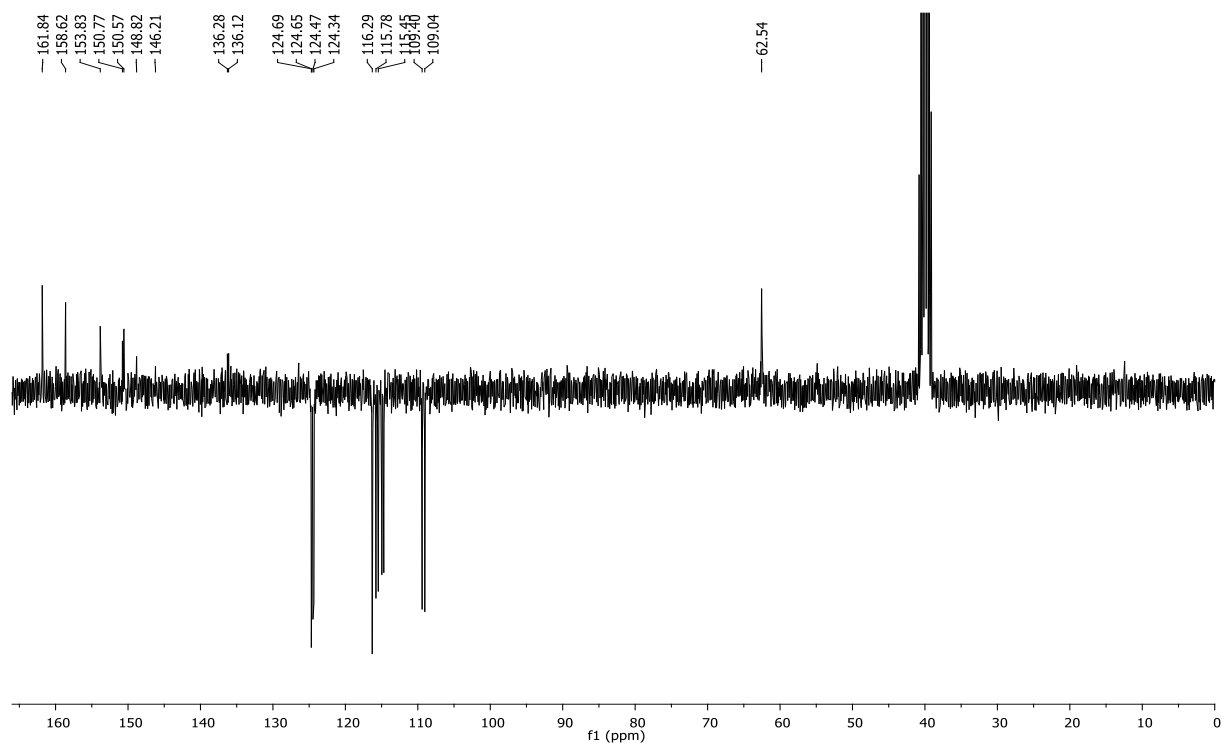

**Fig. S42** a)  $^1\text{H}$  NMR and b)  $^{13}\text{C}$  NMR of compd. **22c**

a)

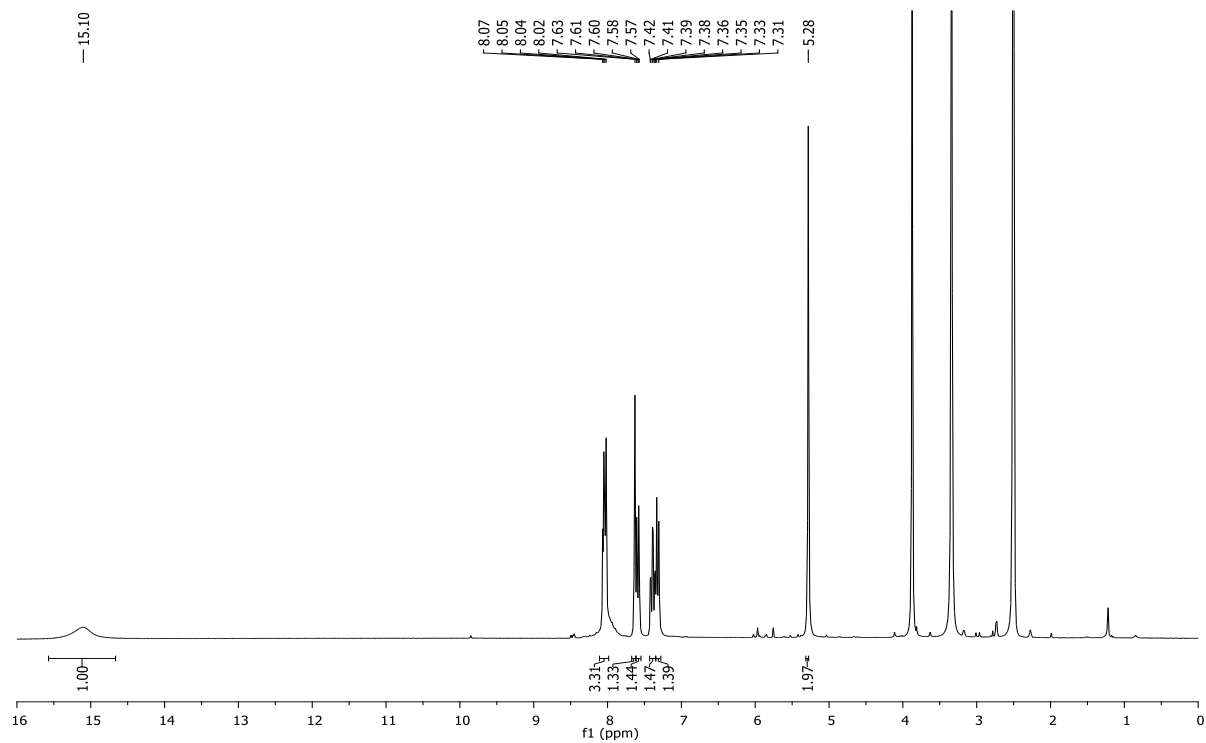

b)

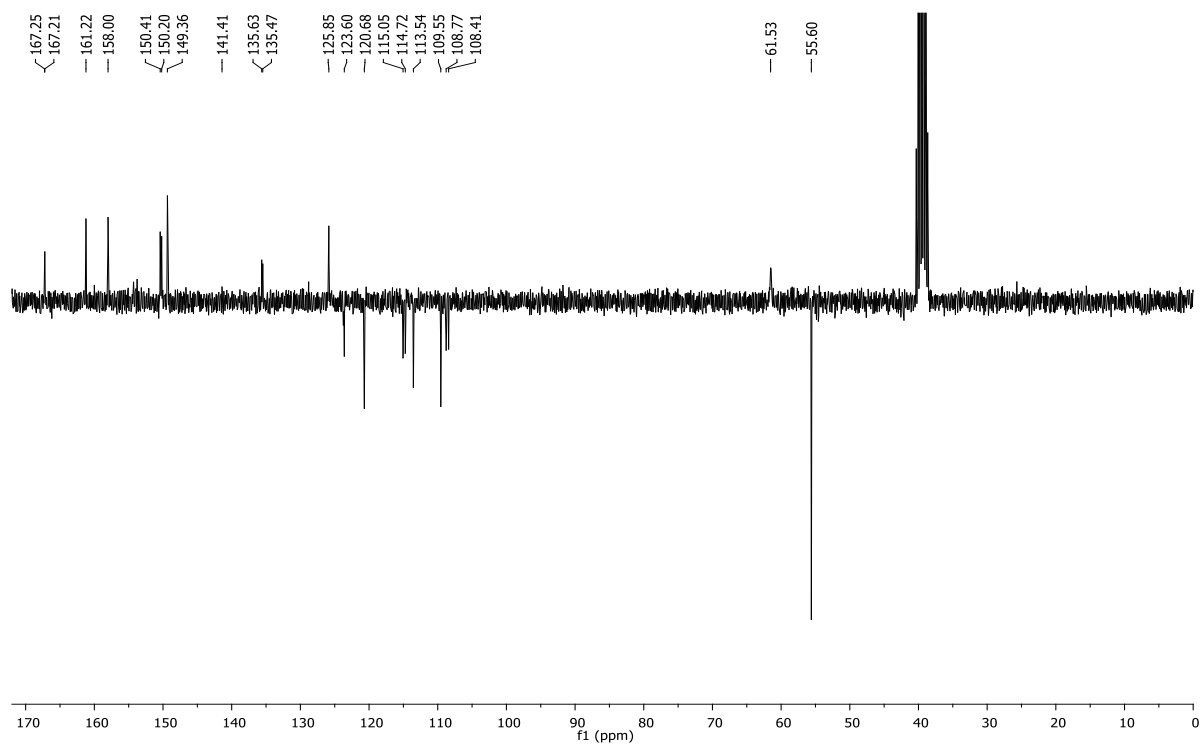

**Fig. S43** a)  $^1\text{H}$  NMR and b)  $^{13}\text{C}$  NMR of compd. **23a**

a)

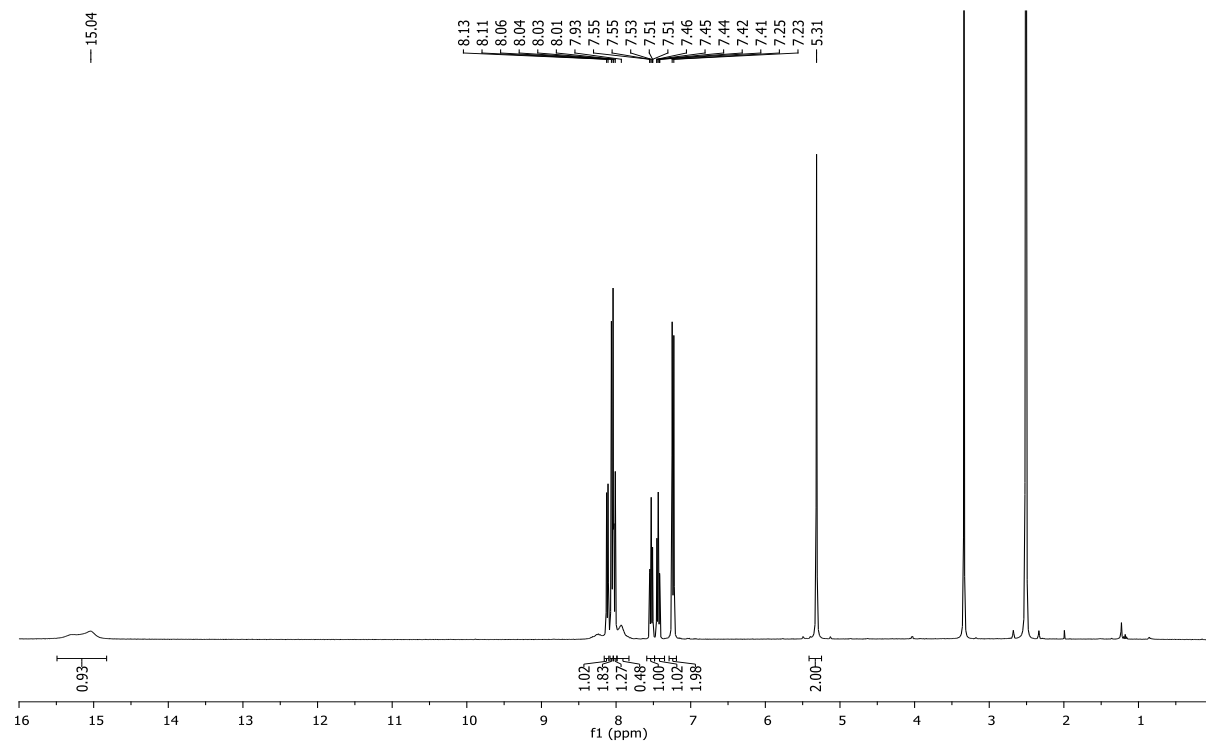

b)

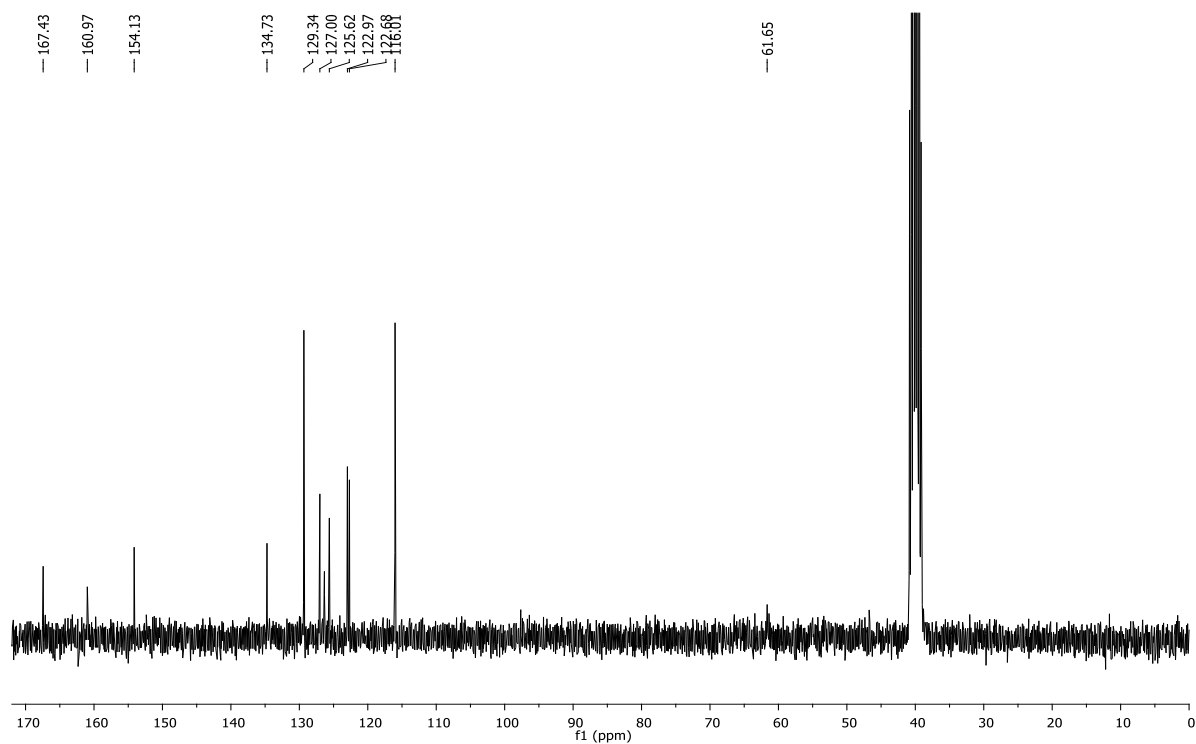



**Fig. S44** a)  $^1\text{H}$  NMR and b)  $^{13}\text{C}$  NMR of compd. **23b**

a)

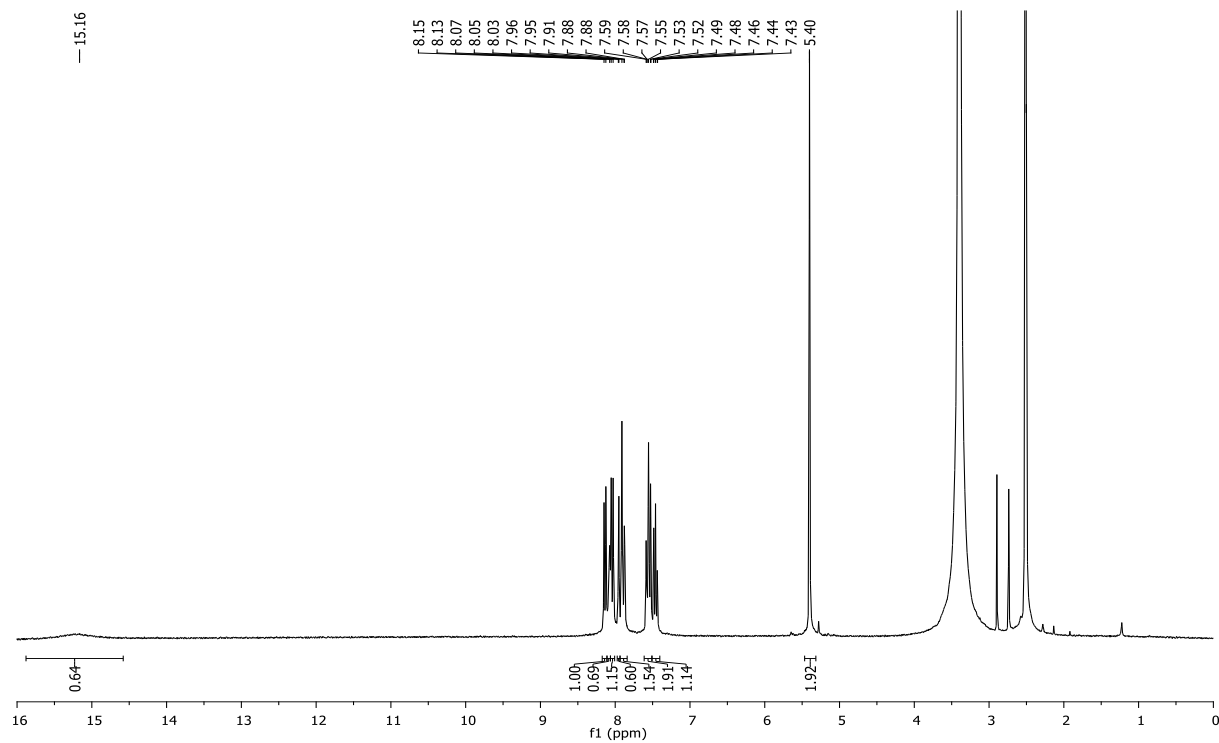

b)

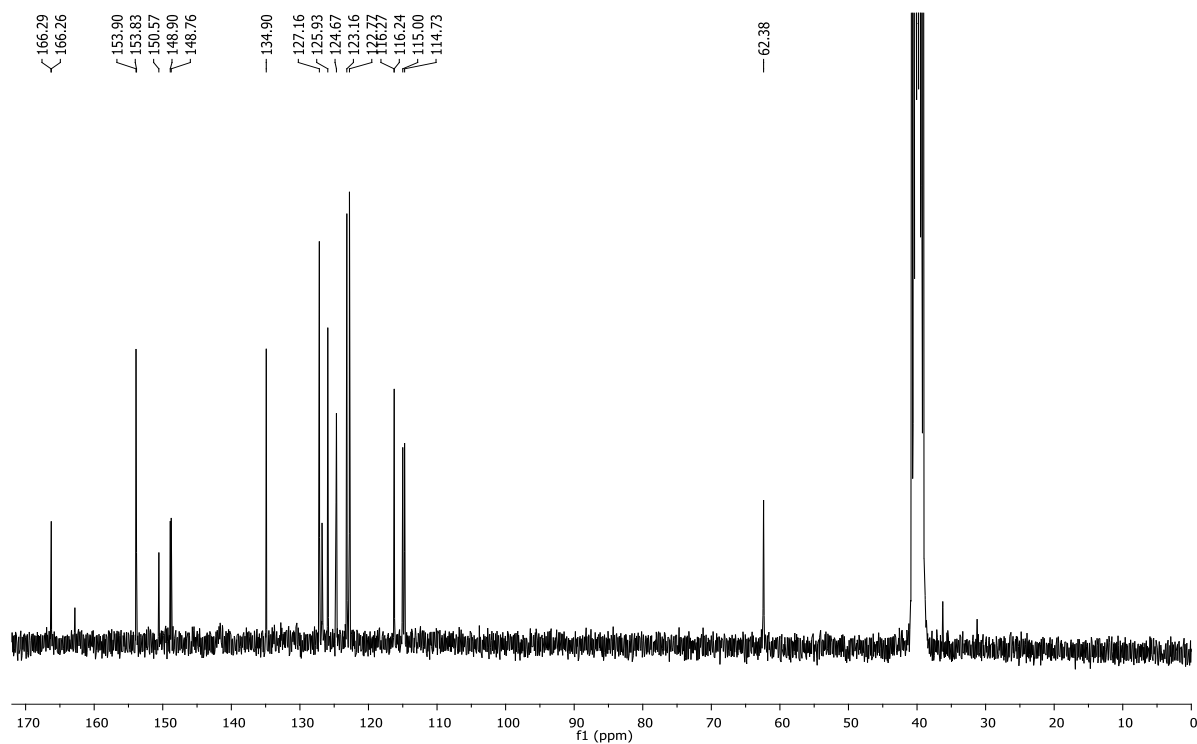

**Fig. S45** a)  $^1\text{H}$  NMR and b)  $^{13}\text{C}$  NMR of compd. **23c**

a)

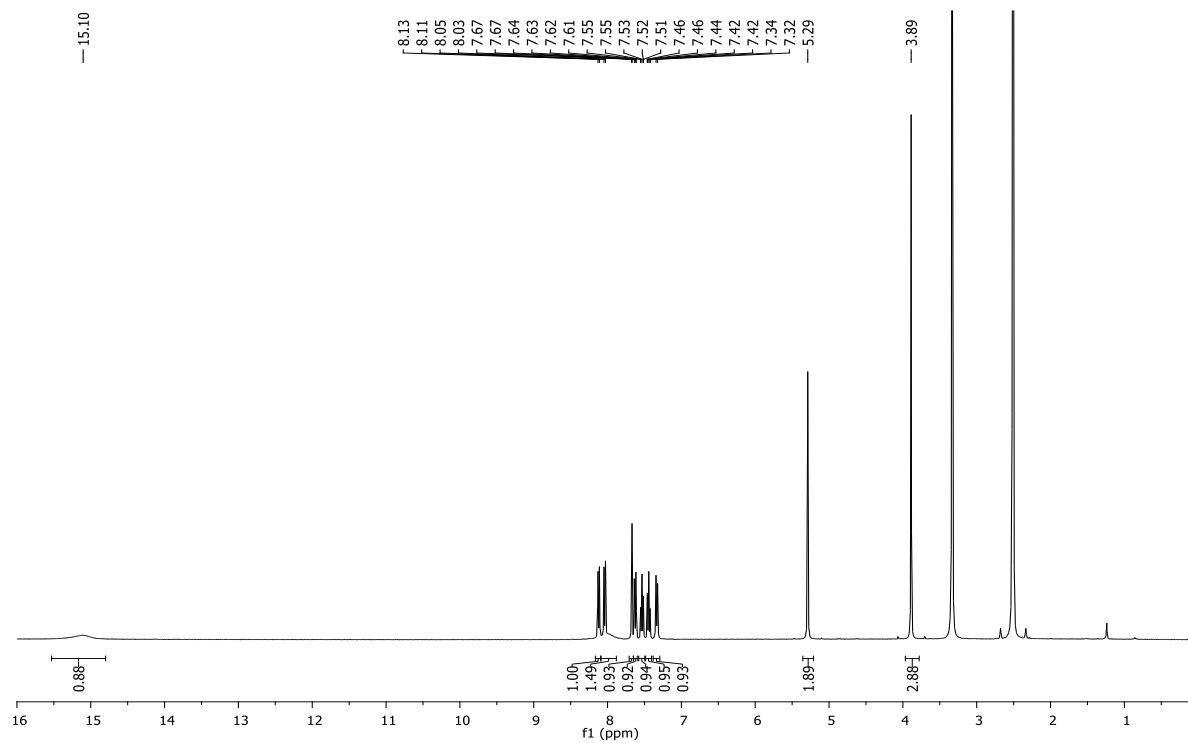

b)

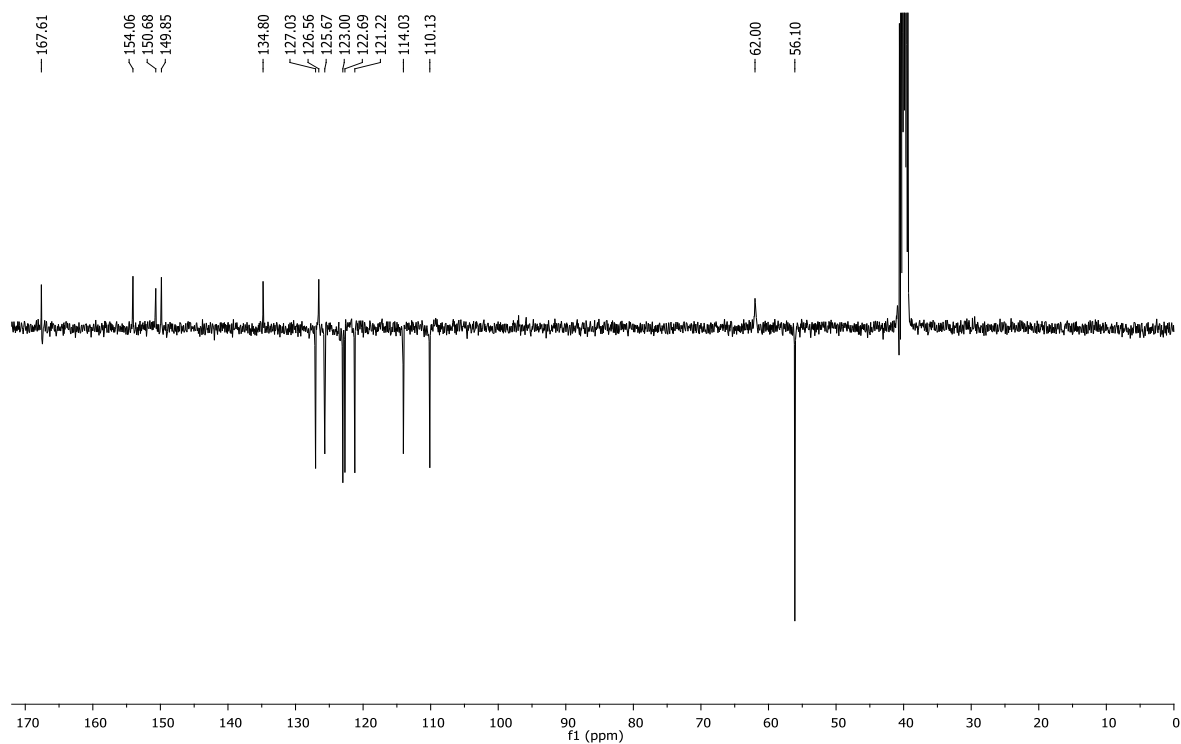

**Fig. S46** a)  $^1\text{H}$  NMR and b)  $^{13}\text{C}$  NMR of compd. **24a**

a)

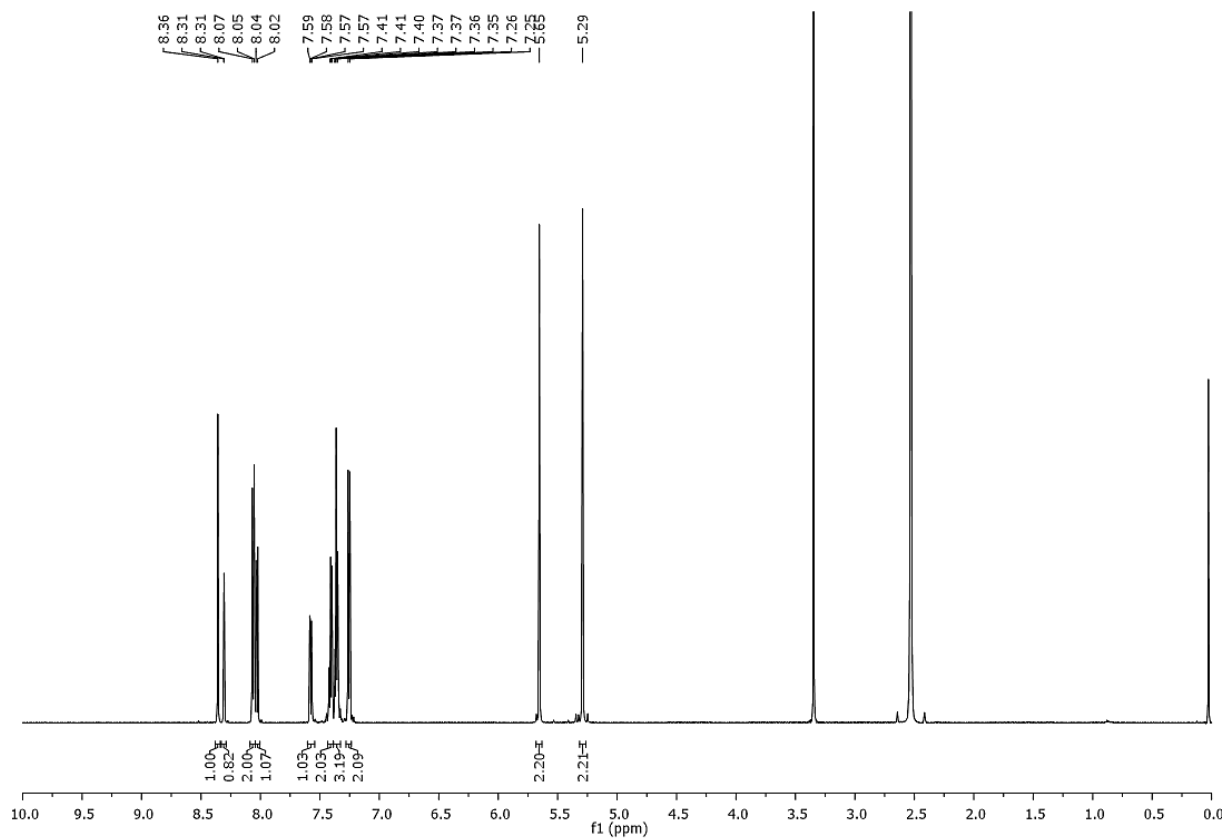

b)

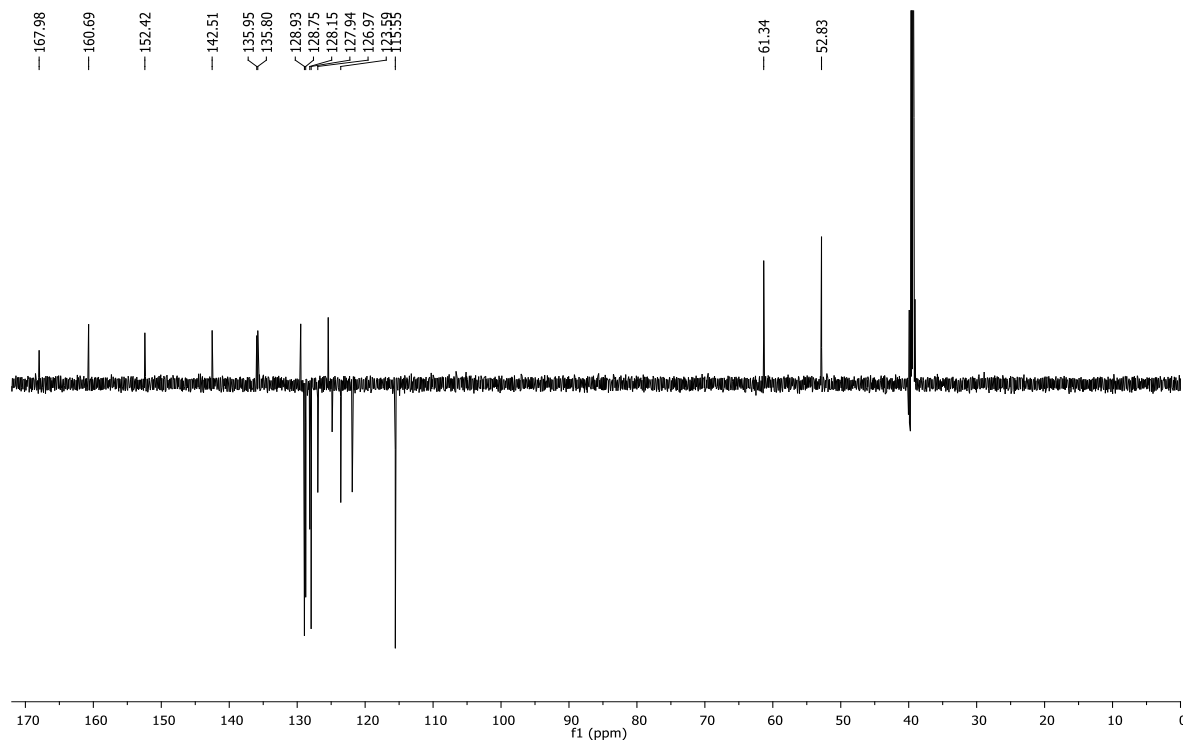

**Fig. S47** a)  $^1\text{H}$  NMR and b)  $^{13}\text{C}$  NMR of compd. **24b**

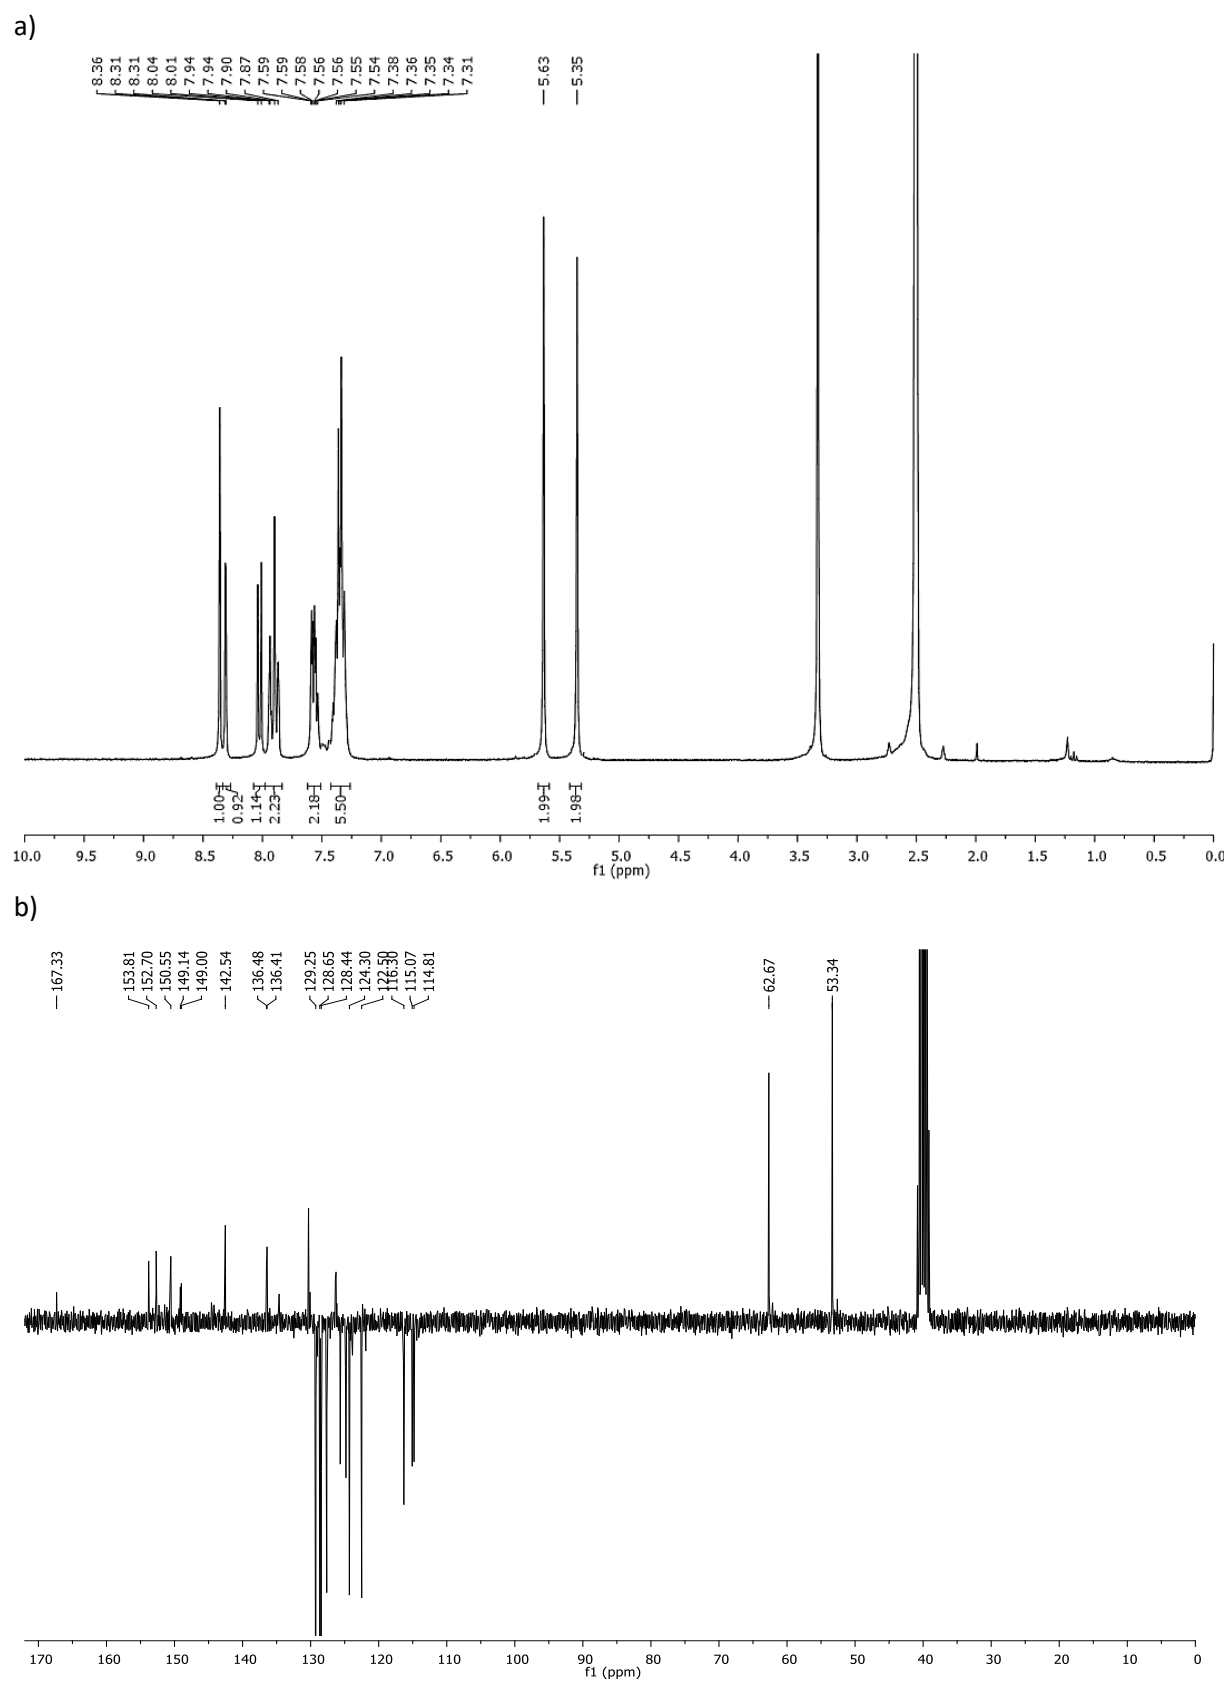

**Fig. S48** a)  $^1\text{H}$  NMR and b)  $^{13}\text{C}$  NMR of compd. **24c**

a)

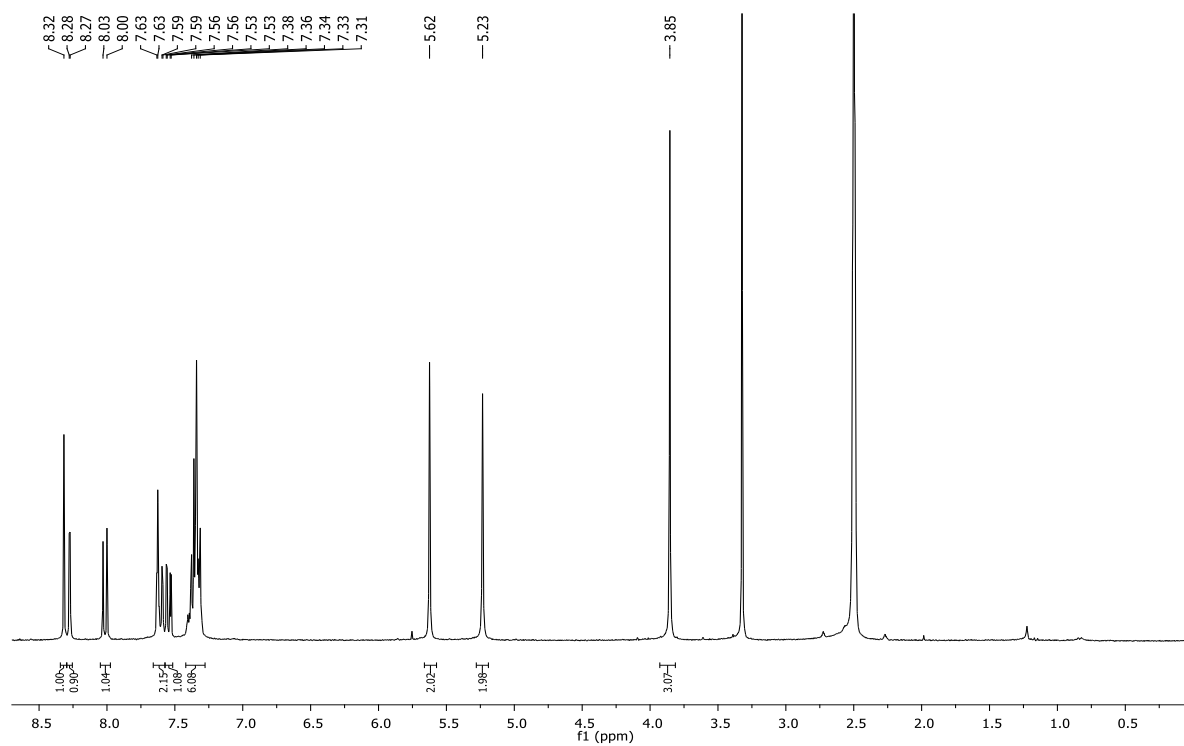

b)

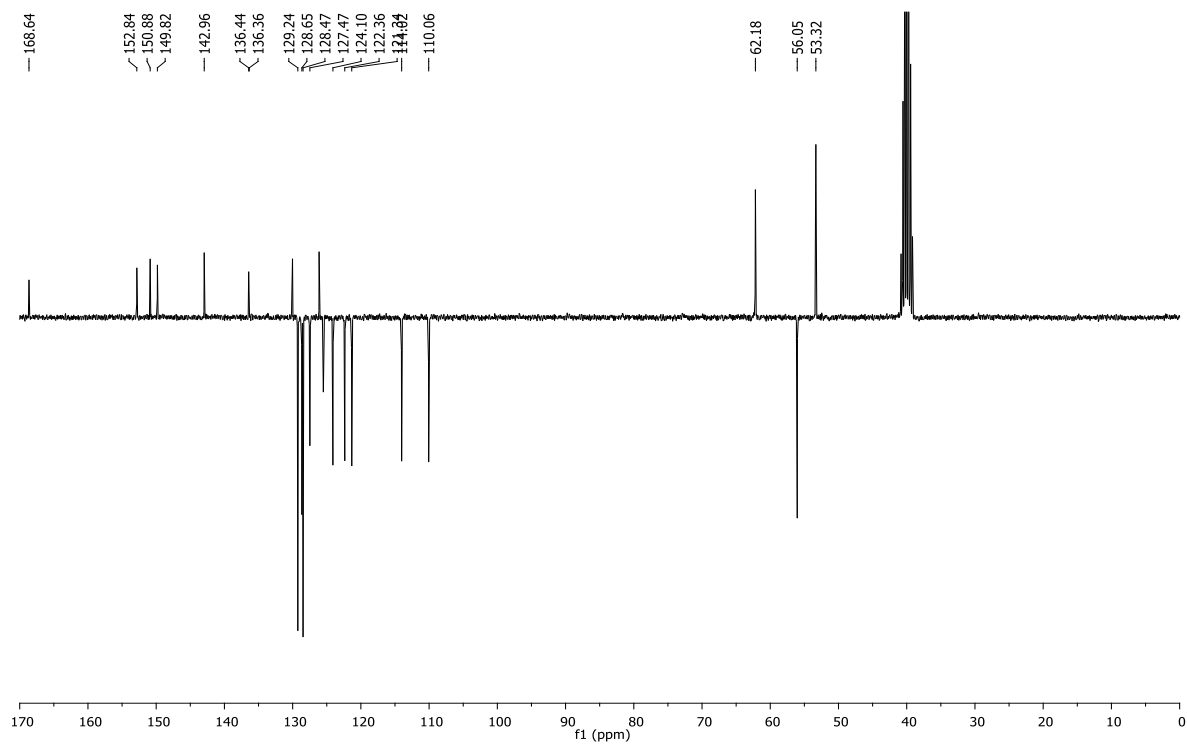

**Fig. S49** a)  $^1\text{H}$  NMR and b)  $^{13}\text{C}$  NMR of compd. **25a**

a)

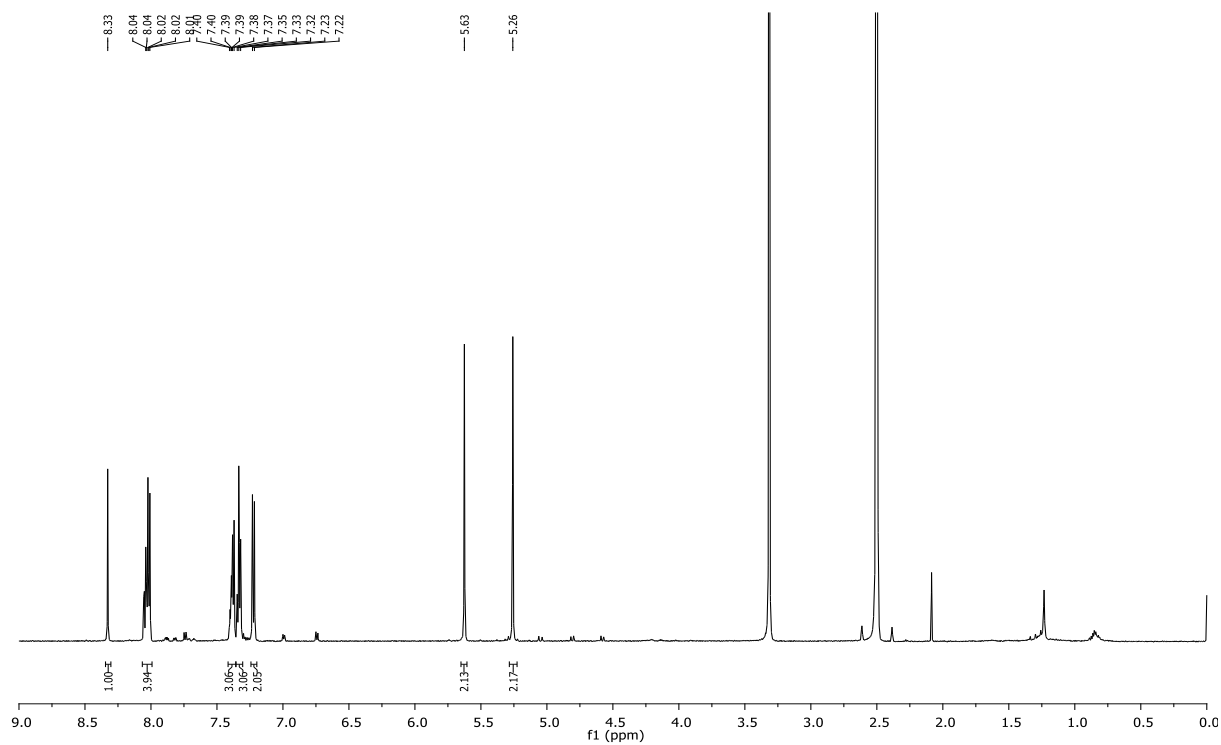

b)

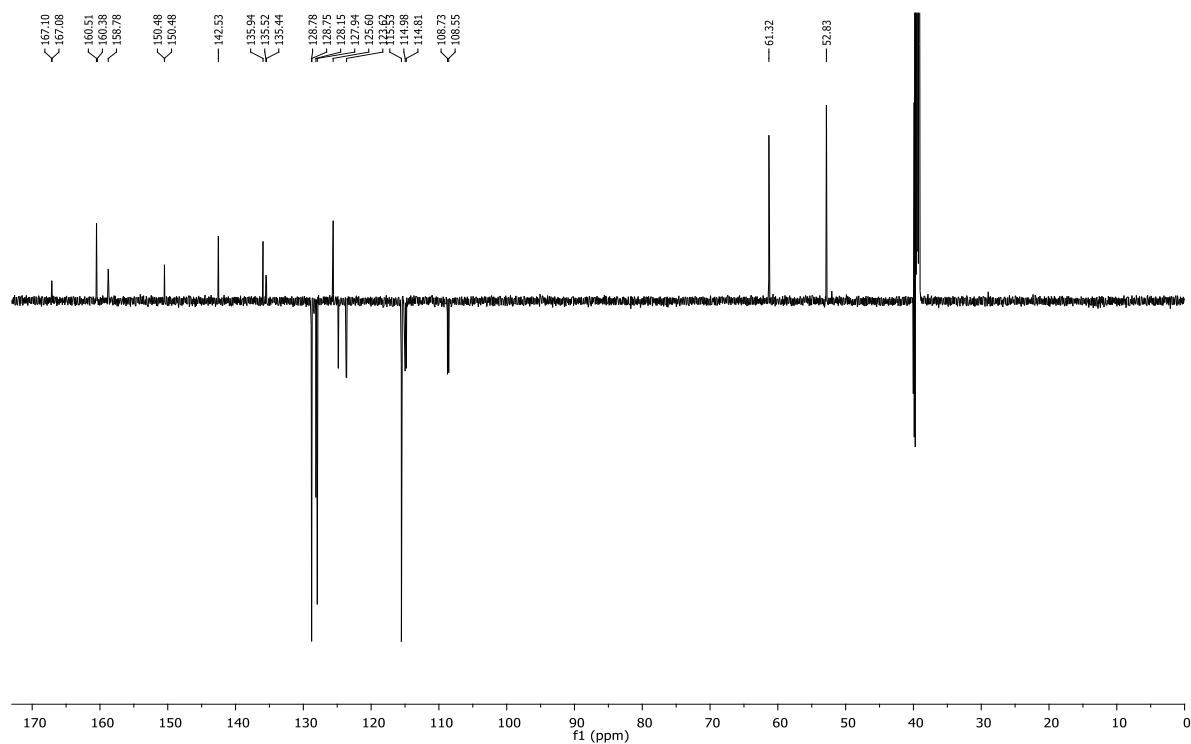

**Fig. S50** a)  $^1\text{H}$  NMR and b)  $^{13}\text{C}$  NMR of compd. **25b**

a)

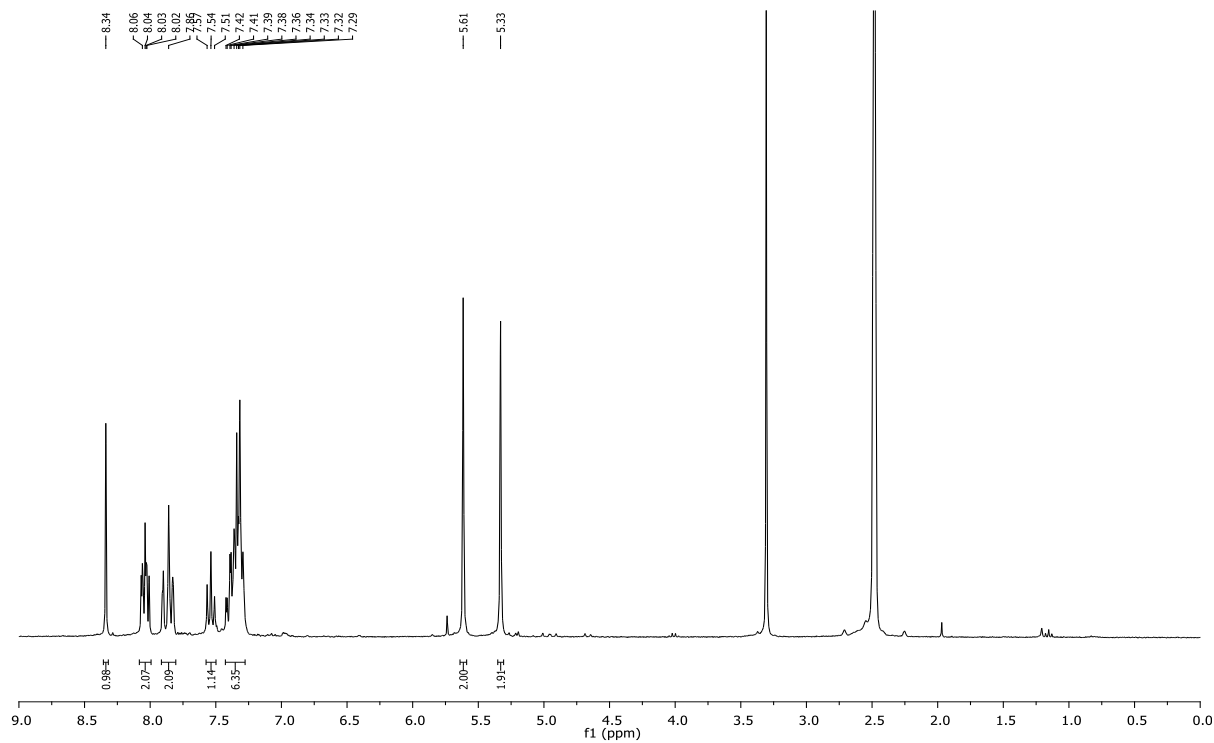

b)

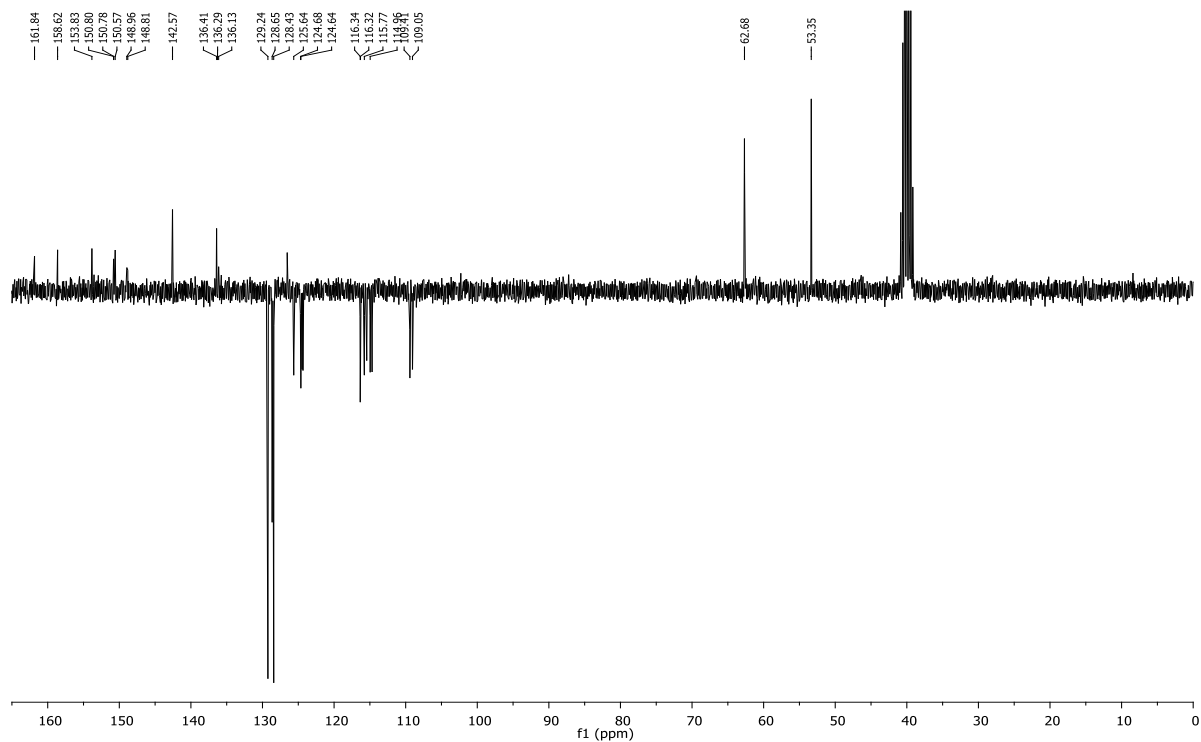

**Fig. S51** a)  $^1\text{H}$  NMR and b)  $^{13}\text{C}$  NMR of compd. **25c**

a)

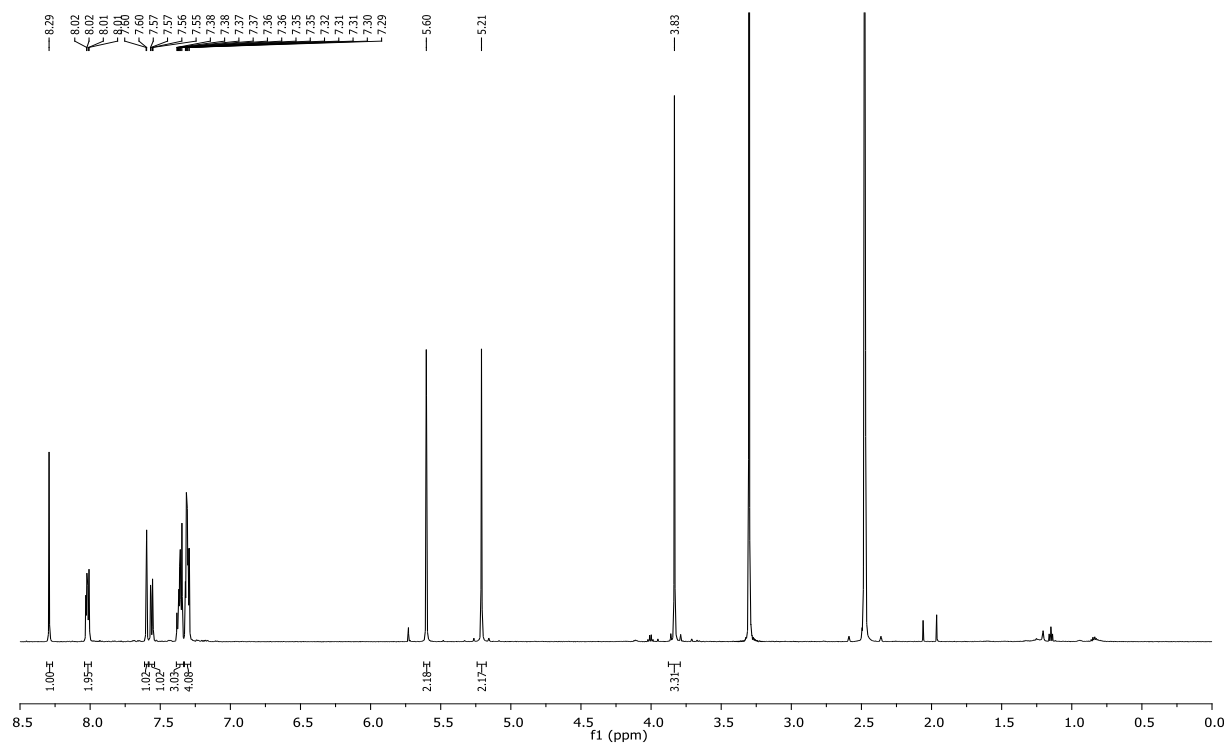

b)

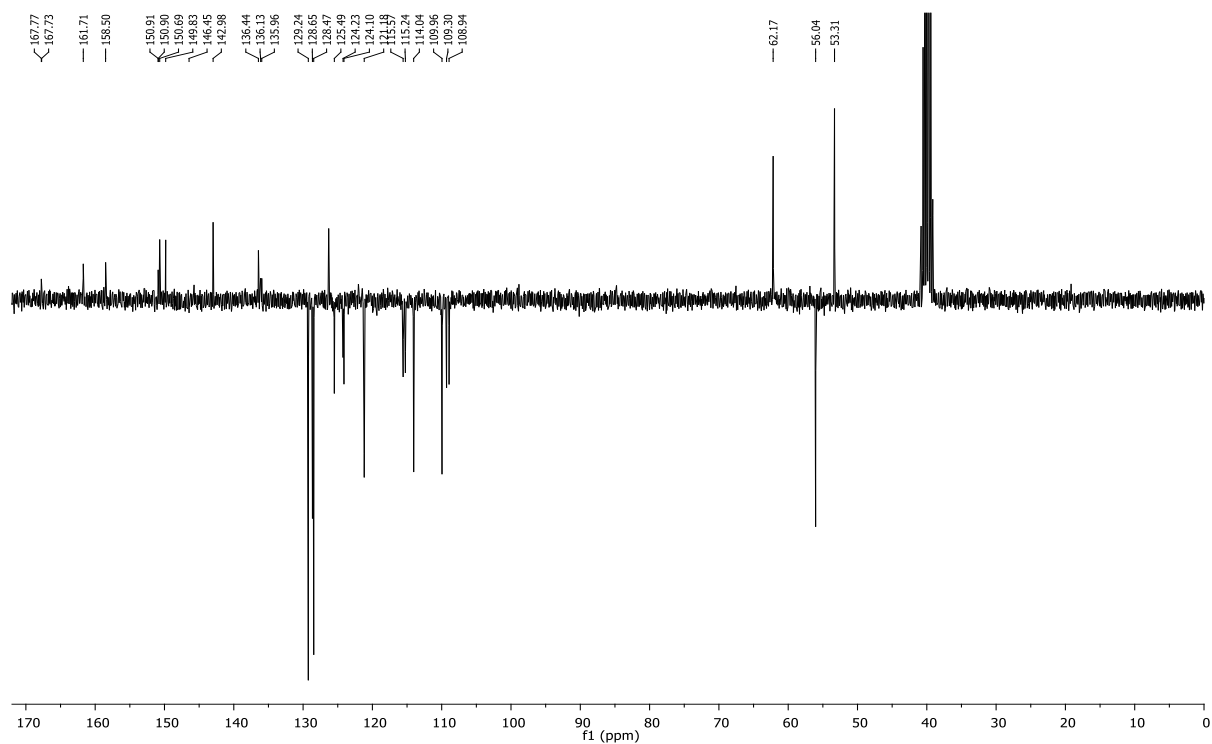



**Fig. S52** a)  $^1\text{H}$  NMR and b)  $^{13}\text{C}$  NMR of compd. **26a**

a)

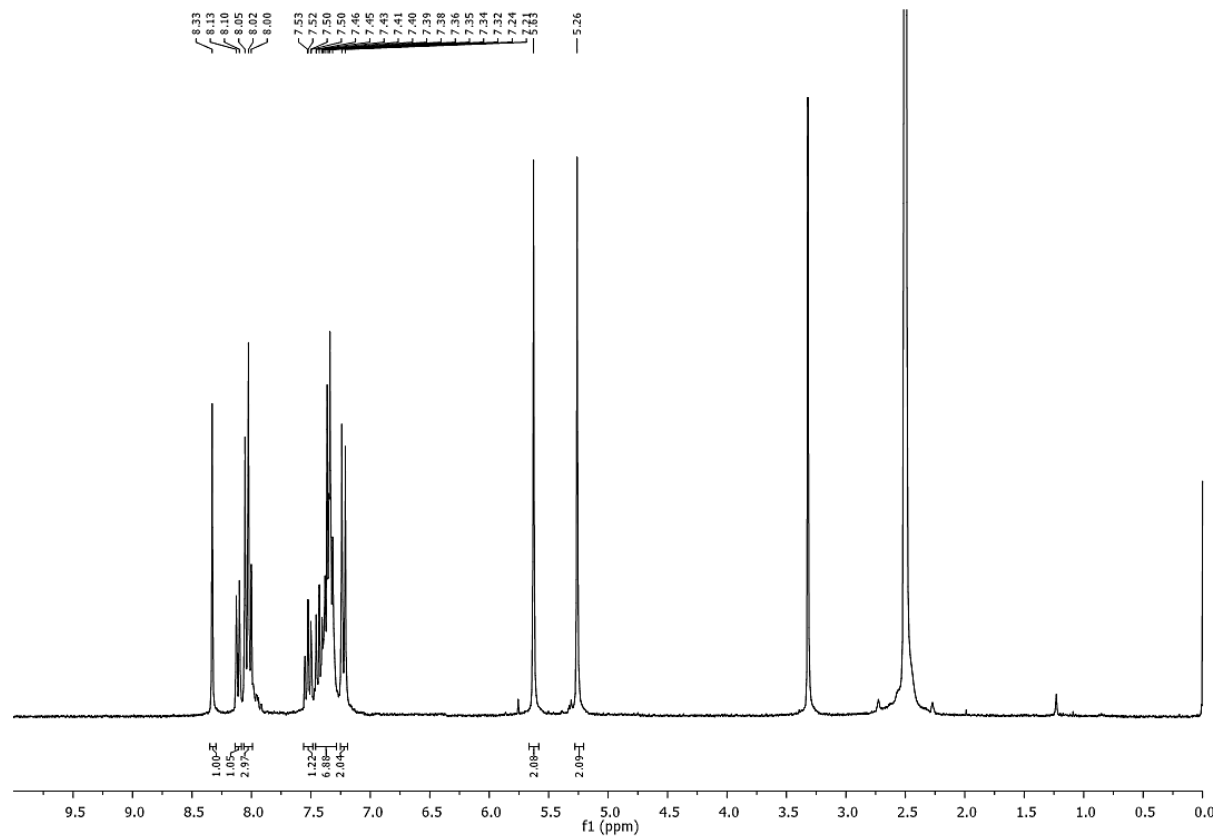

b)

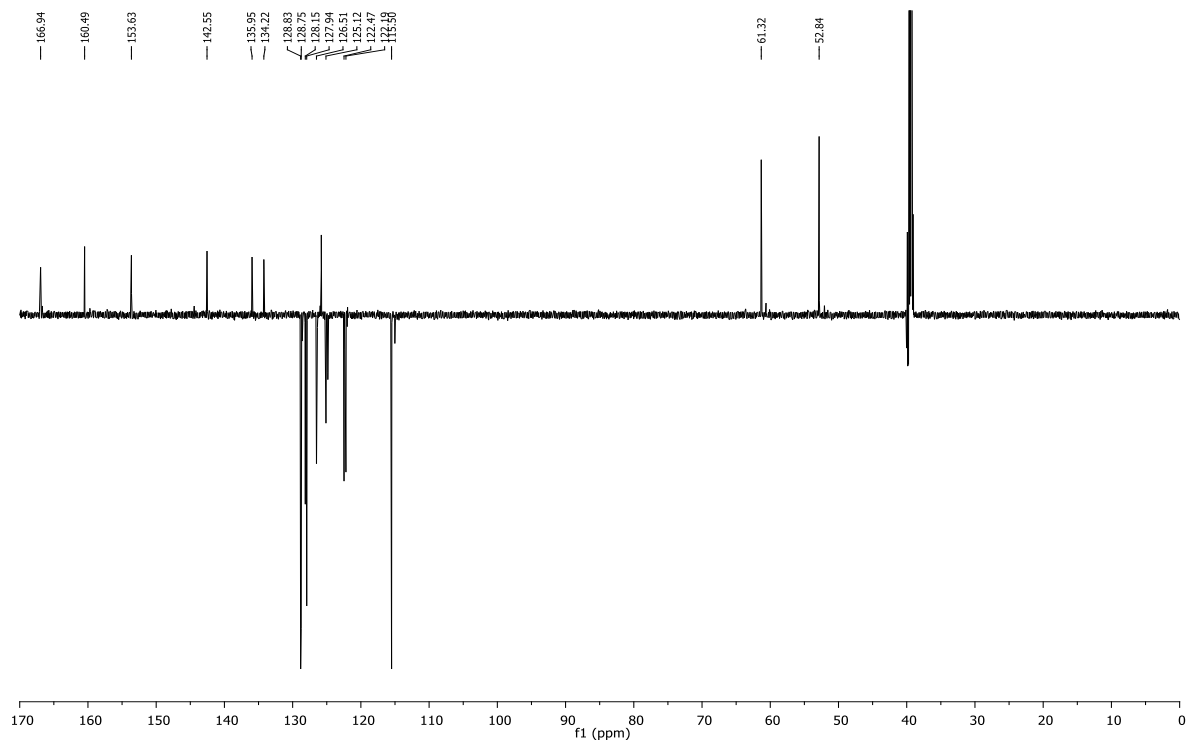

**Fig. S53** a)  $^1\text{H}$  NMR and b)  $^{13}\text{C}$  NMR of compd. **26b**

a)

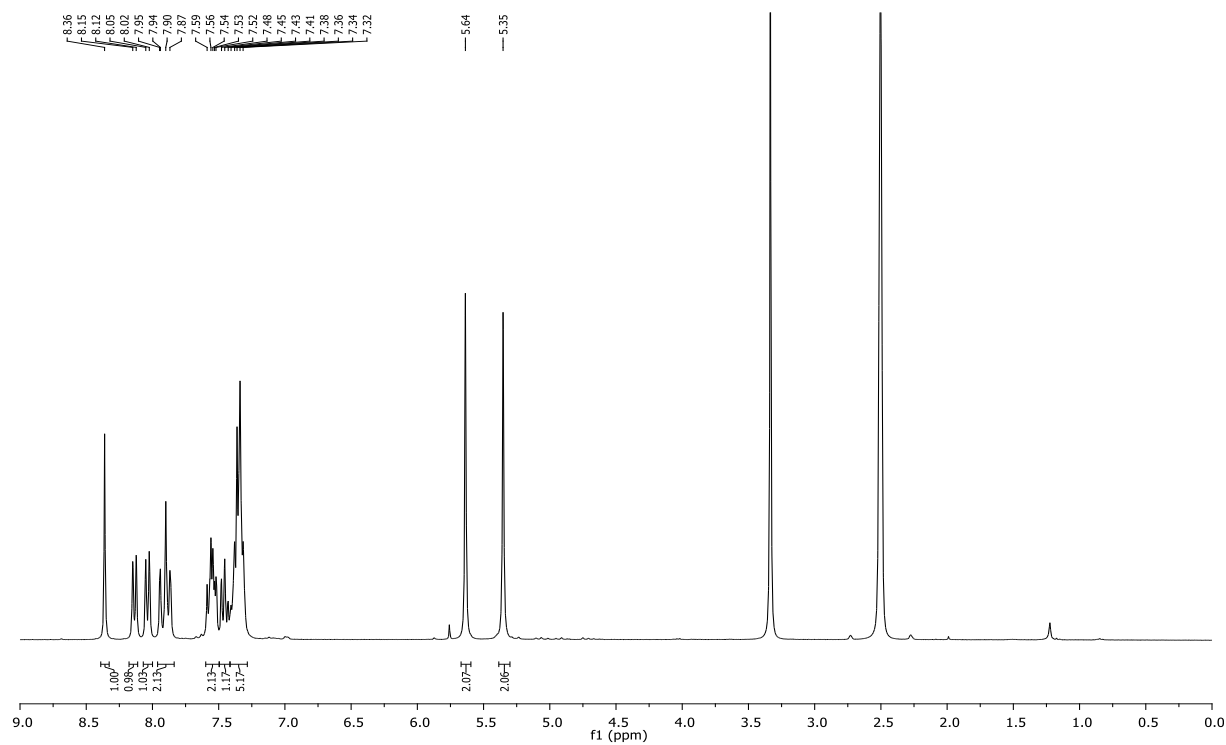

b)

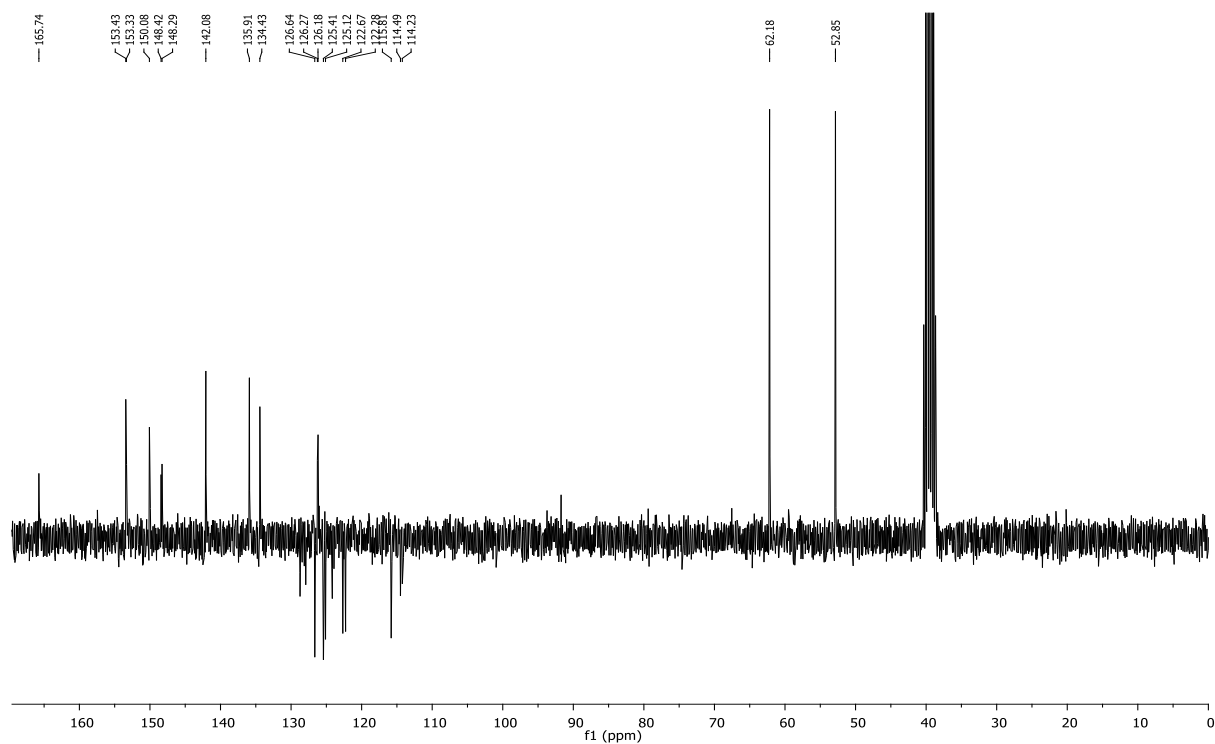

**Fig. S54** a)  $^1\text{H}$  NMR and b)  $^{13}\text{C}$  NMR of compd. **26c**

a)

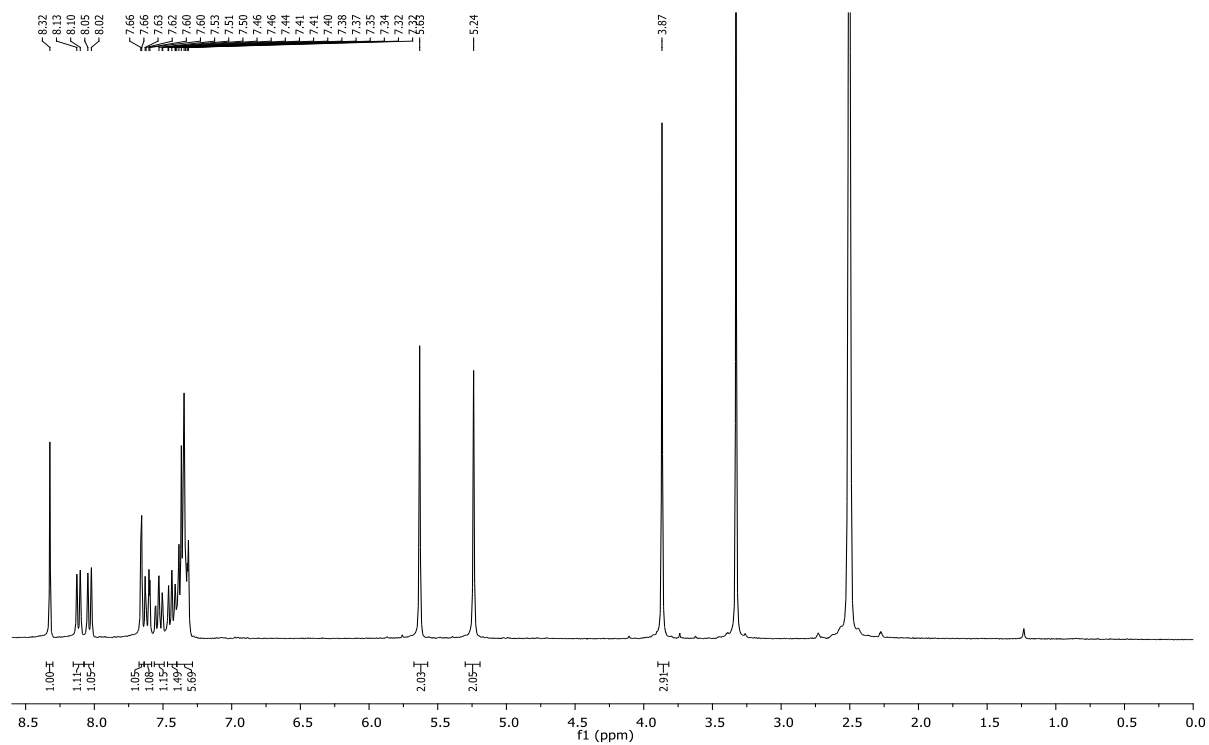

b)

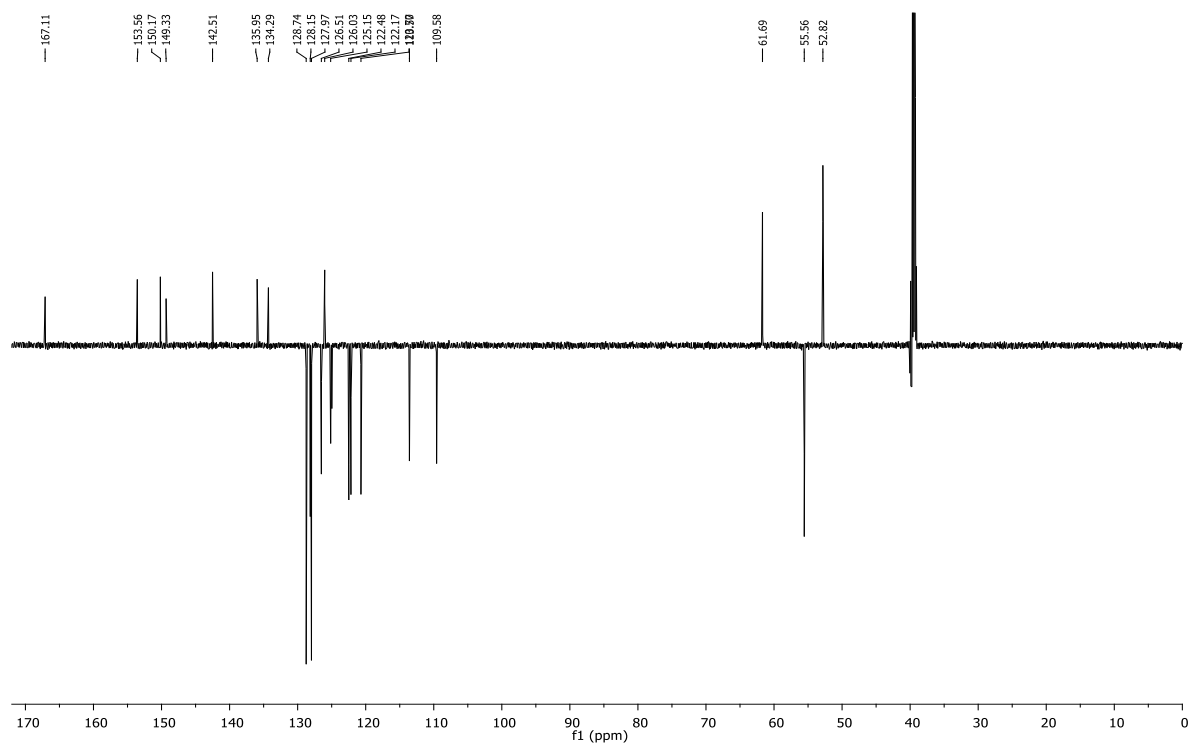

**Fig. S55** a)  $^1\text{H}$  NMR and b)  $^{13}\text{C}$  NMR of compd. **34a**

a)

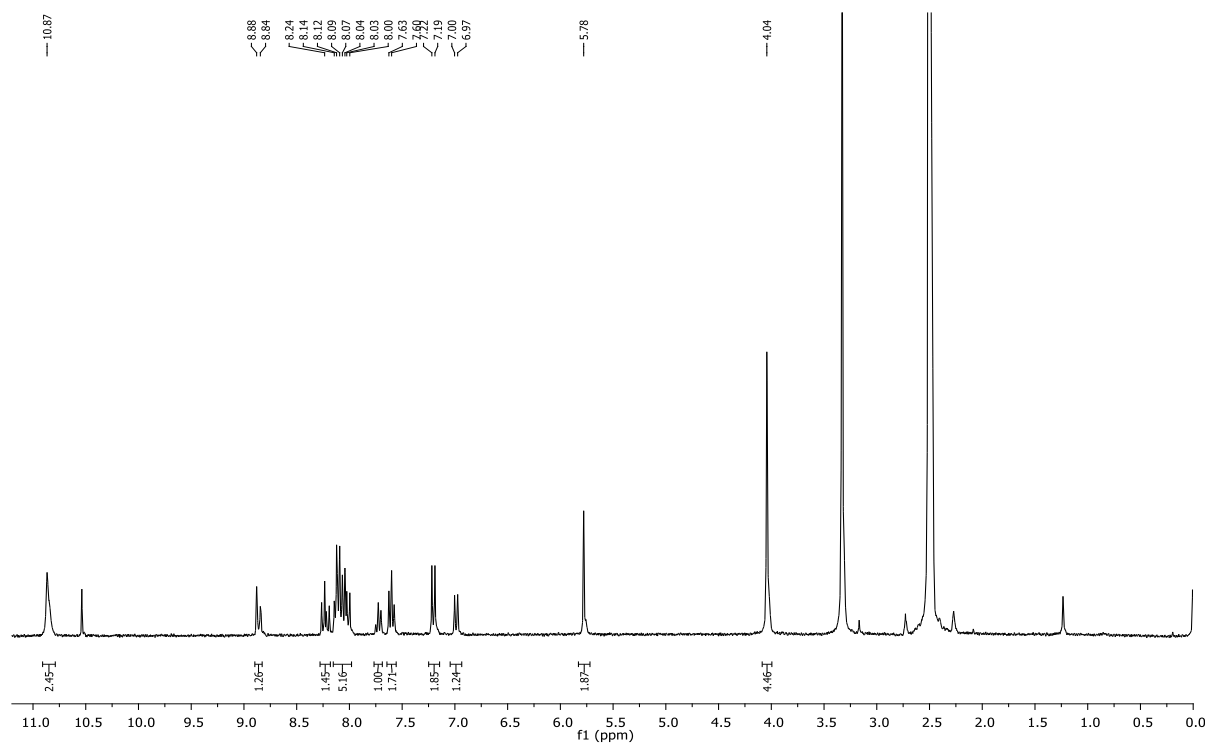

b)

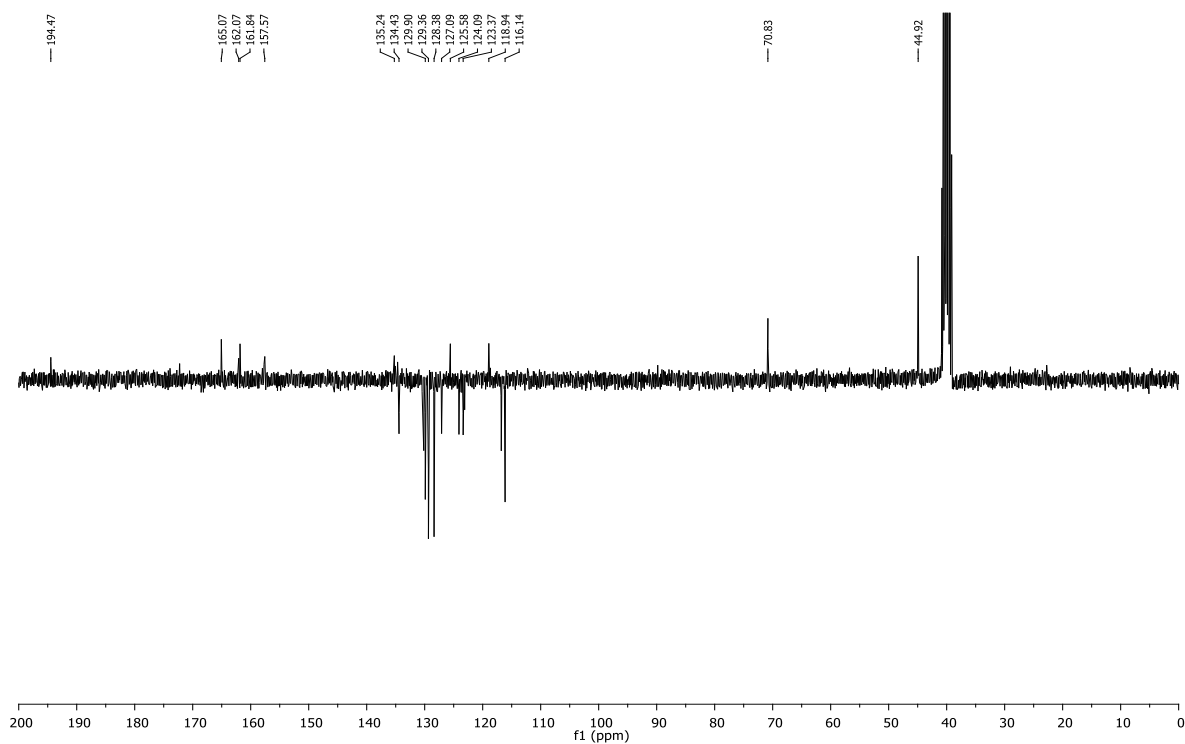

**Fig. S56 a)  $^1\text{H}$  NMR and b)  $^{13}\text{C}$  NMR of compd. **34b****

a)

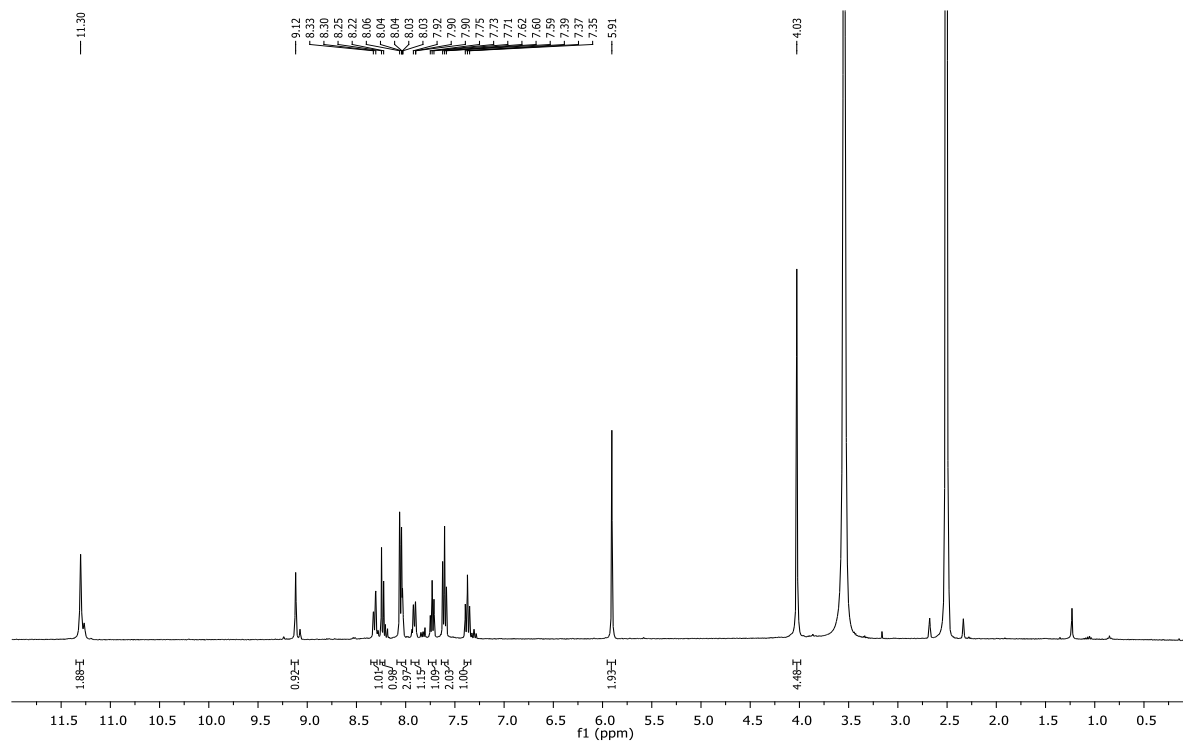

b)

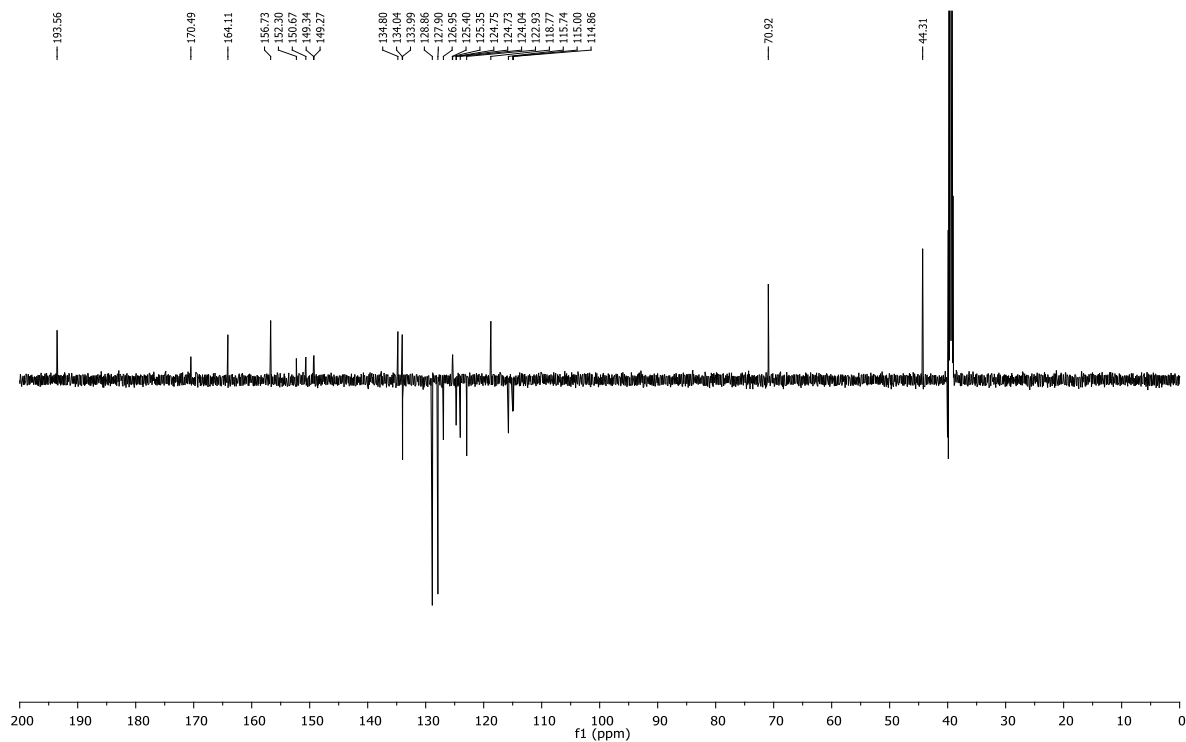

**Fig. S57** a)  $^1\text{H}$  NMR and b)  $^{13}\text{C}$  NMR of compd. **34c**

a)

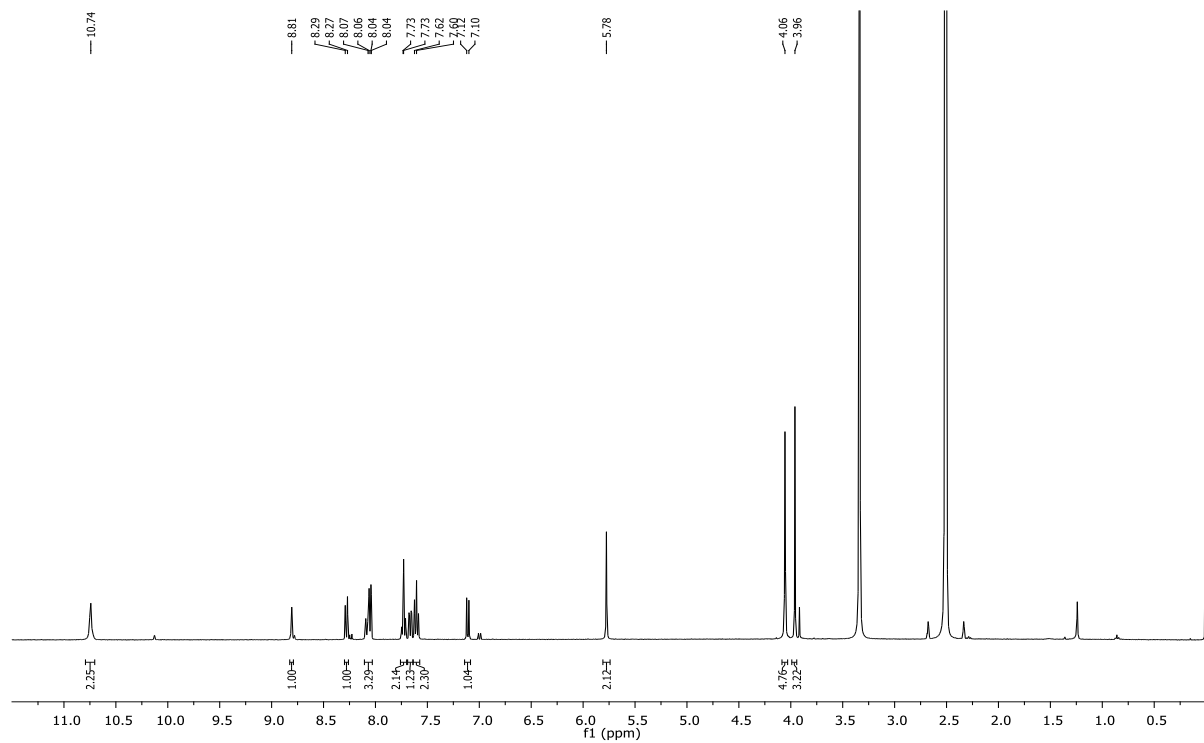

b)

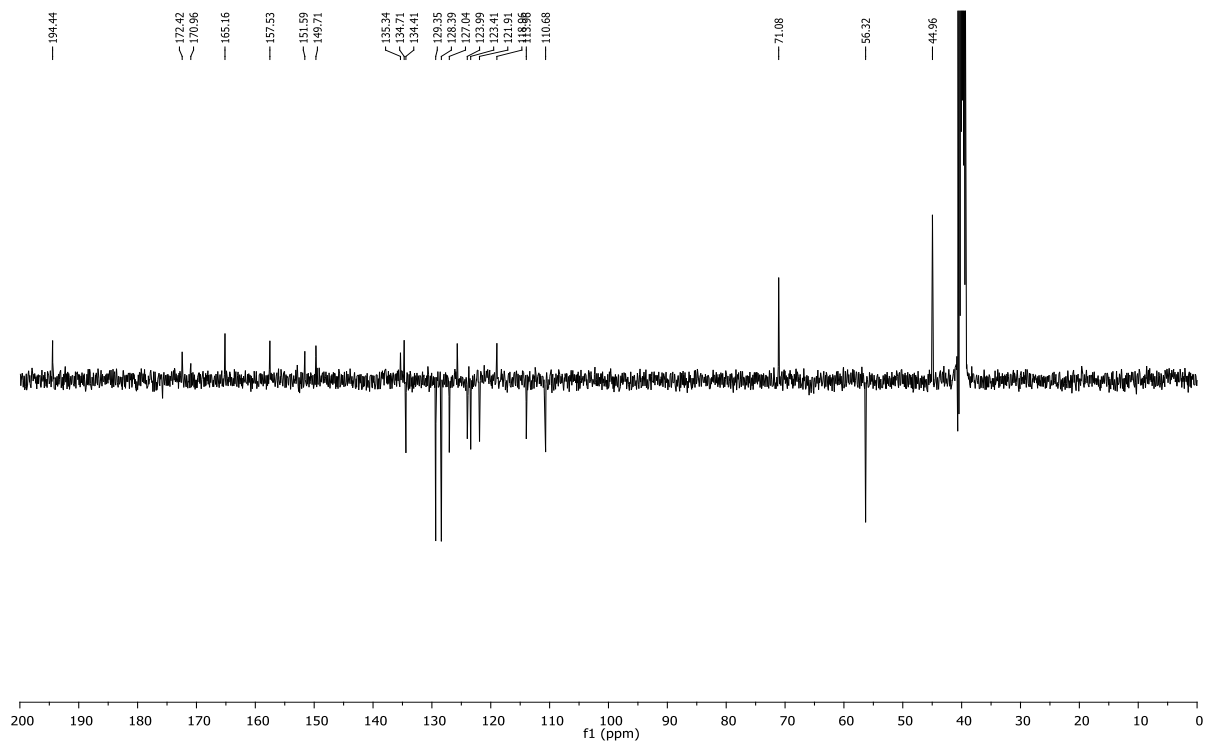

**Fig. S58** a)  $^1\text{H}$  NMR and b)  $^{13}\text{C}$  NMR of compd. **35a**

a)

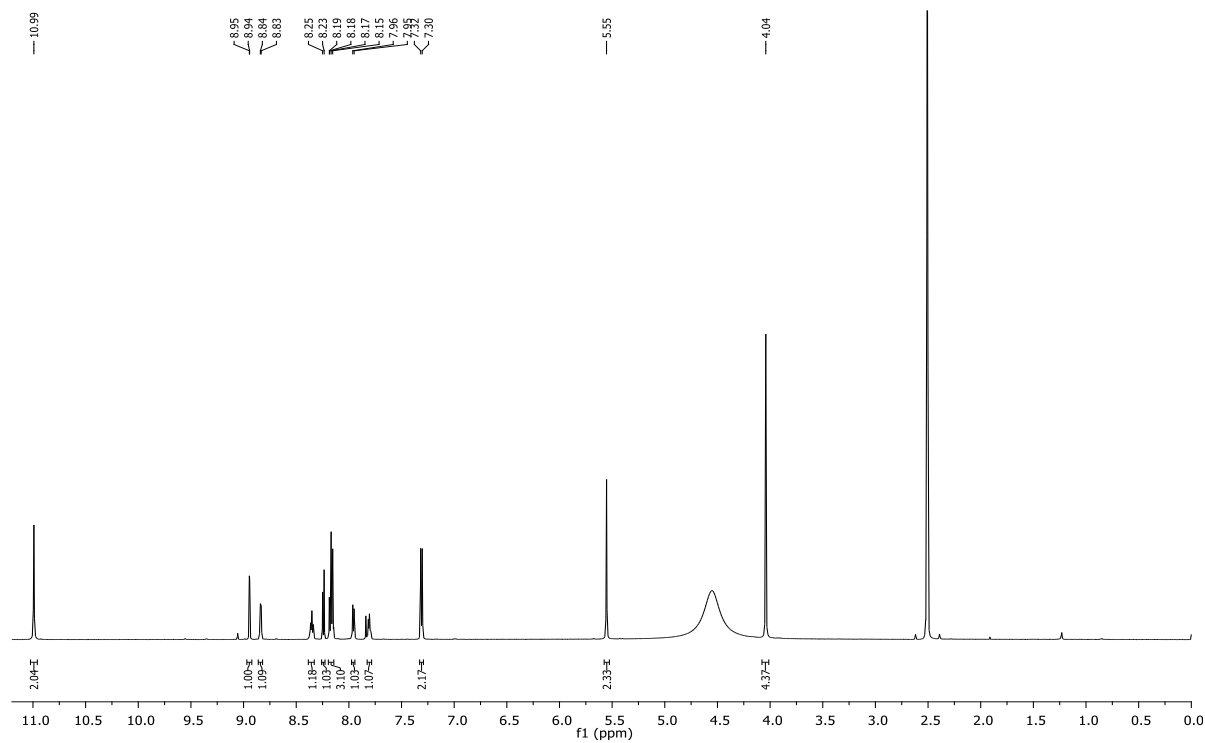

b)

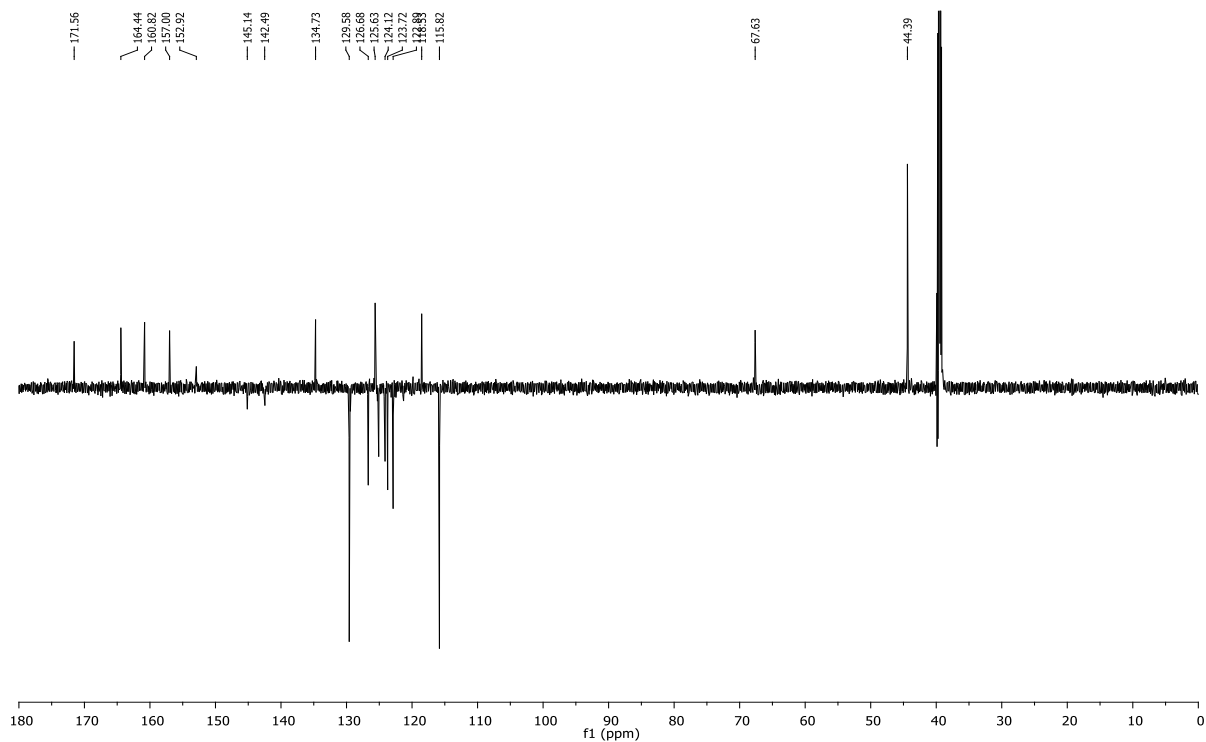

**Fig. S59** a)  $^1\text{H}$  NMR and b)  $^{13}\text{C}$  NMR of compd. **35c**

a)

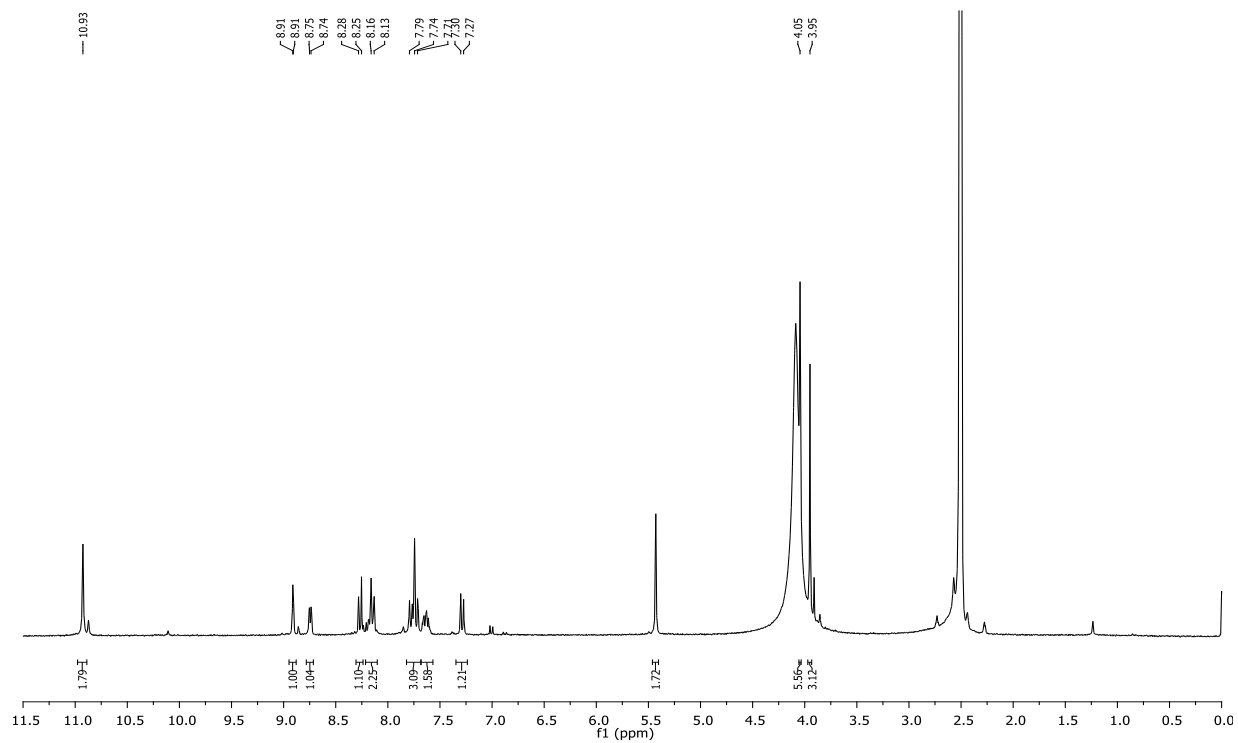

b)

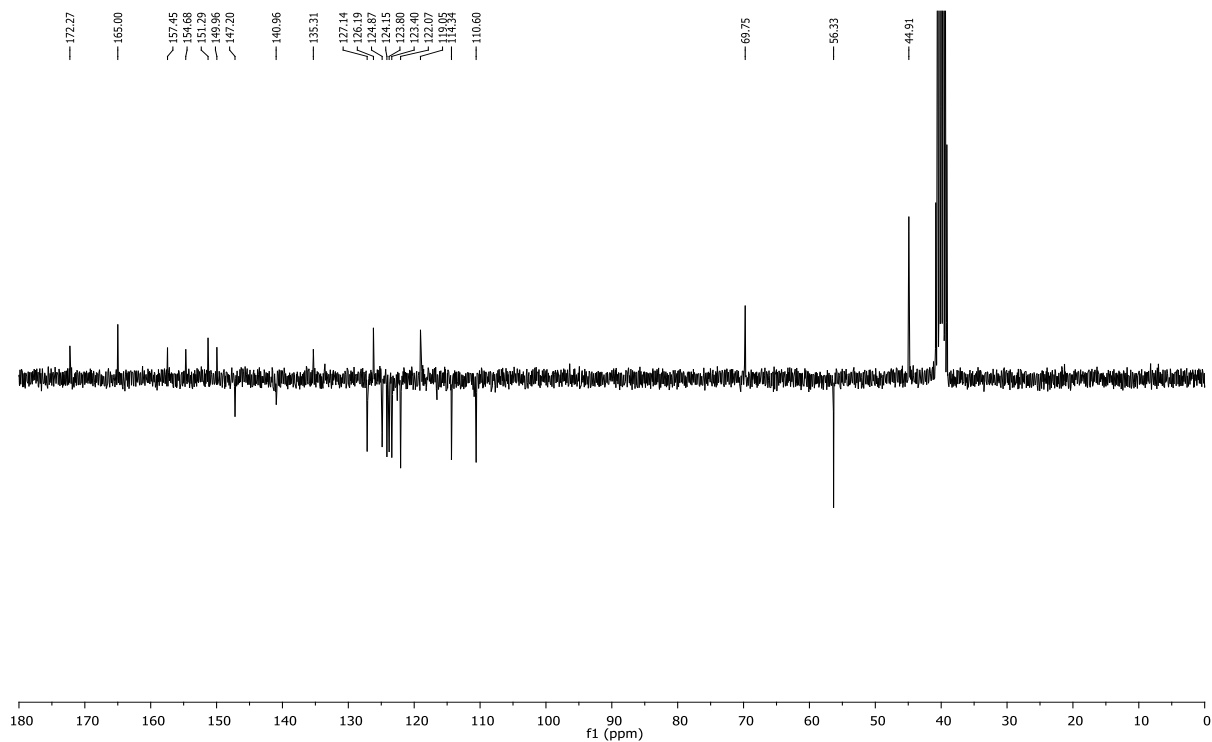



**Fig. S60** a)  $^1\text{H}$  NMR and b)  $^{13}\text{C}$  NMR of compd. **36a**

a)

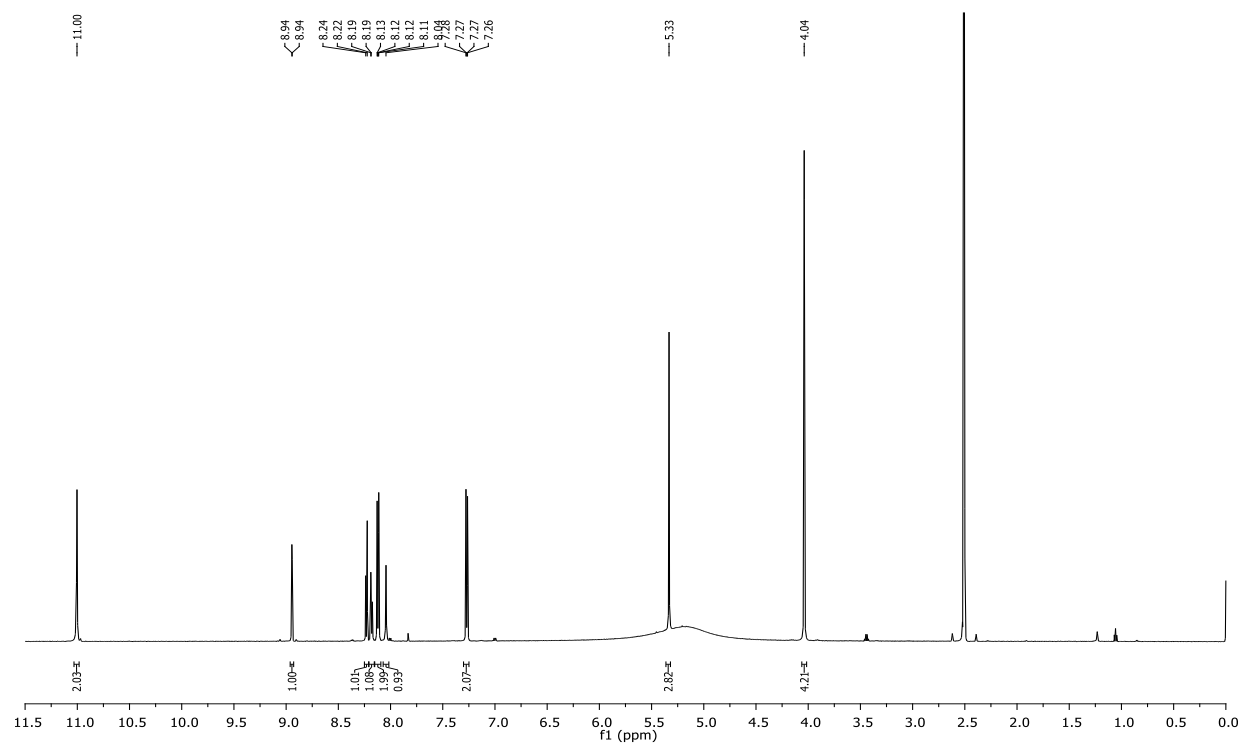

b)

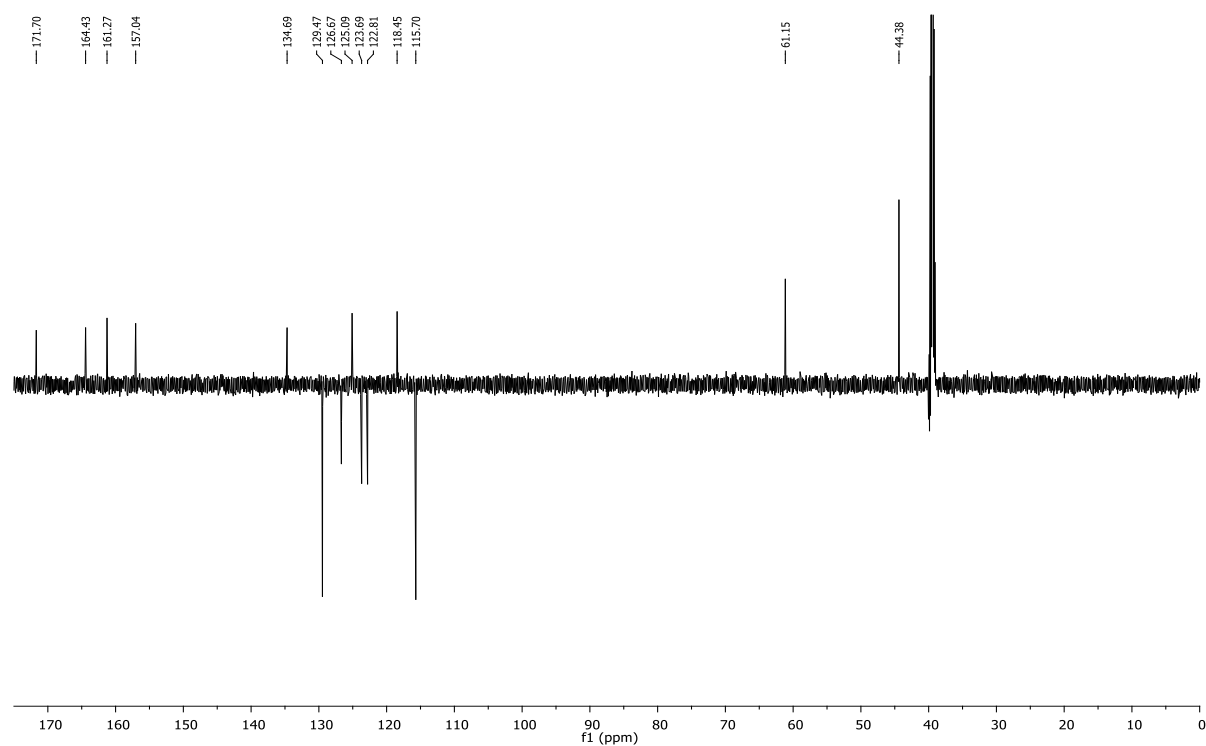

**Fig. S61** a)  $^1\text{H}$  NMR and b)  $^{13}\text{C}$  NMR of compd. **36b**

a)

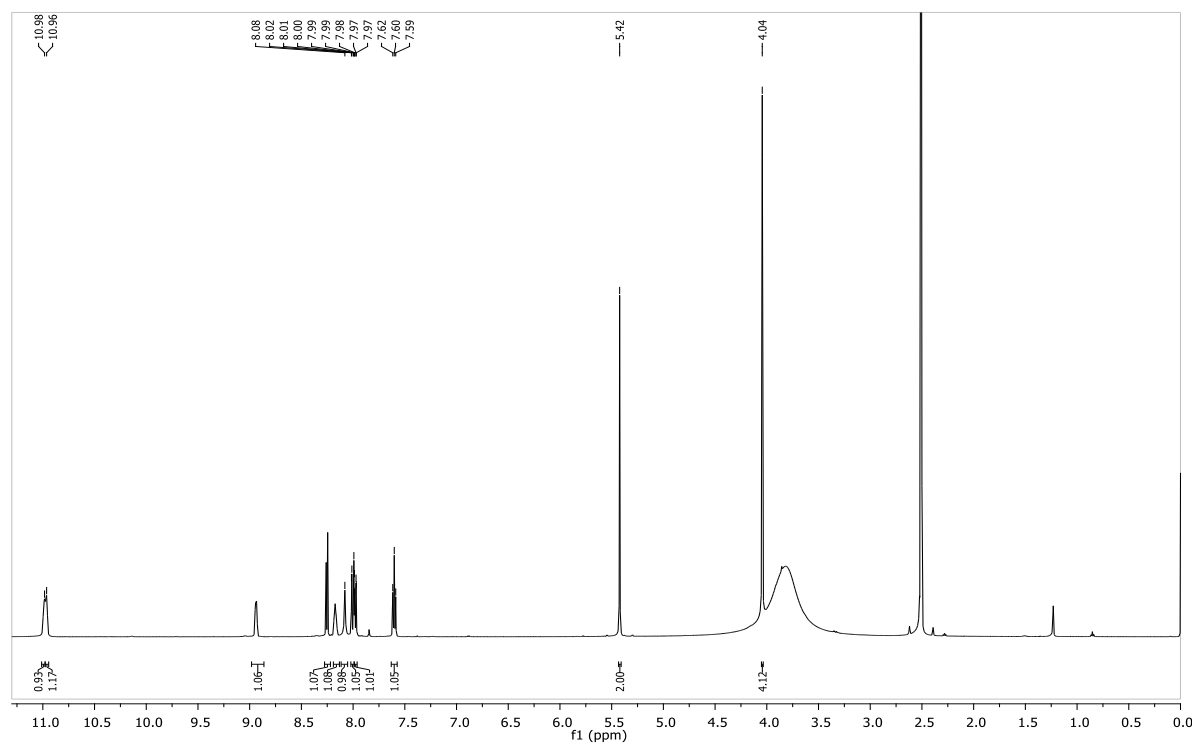

b)

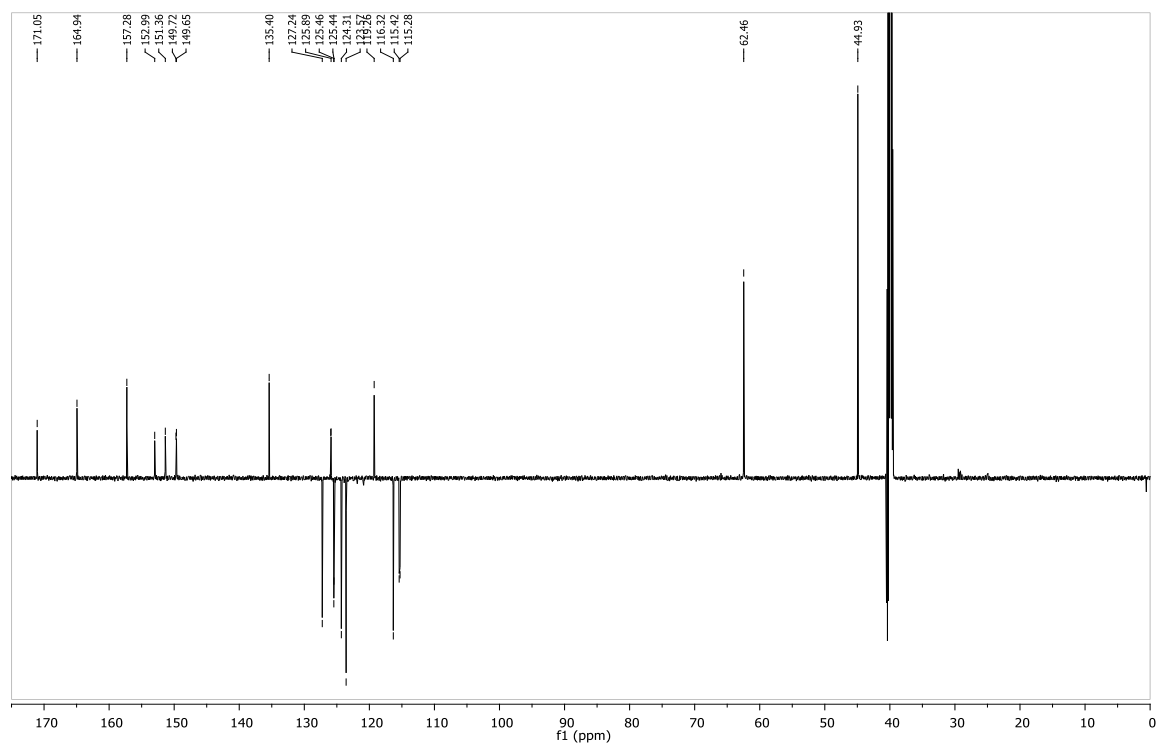

**Fig. S62** a)  $^1\text{H}$  NMR and b)  $^{13}\text{C}$  NMR of compd. **36c**

a)

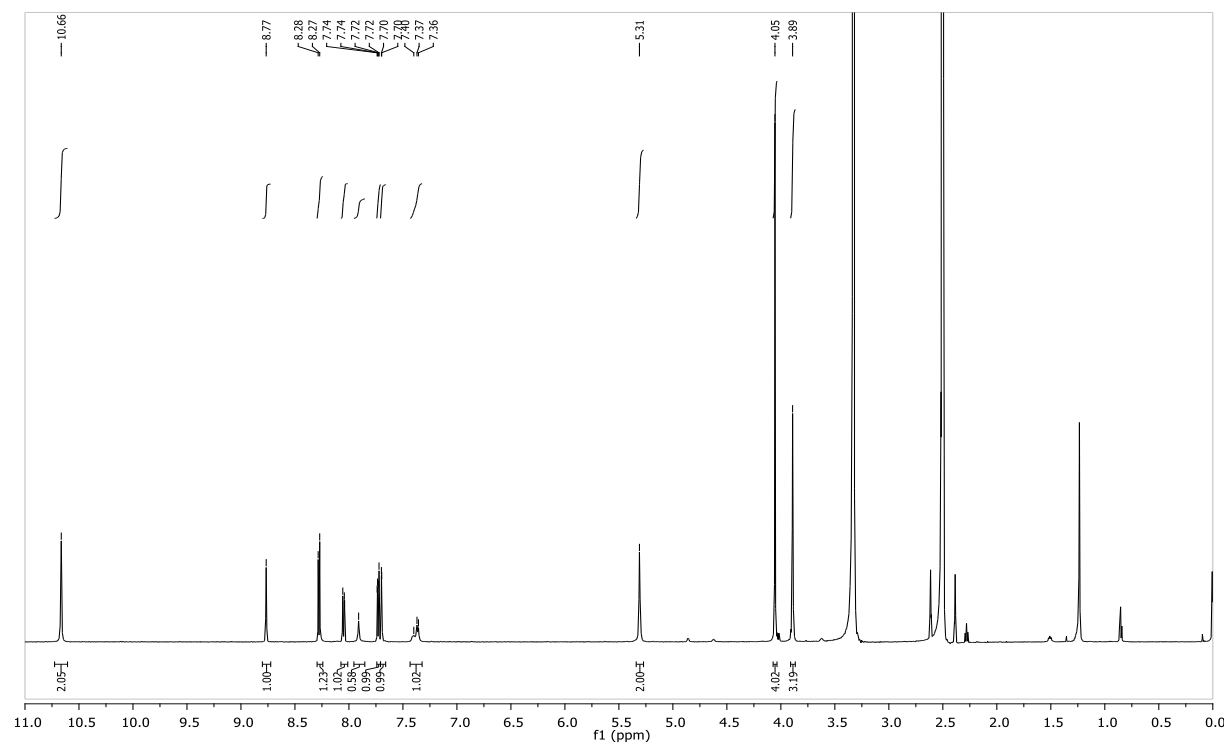

b)

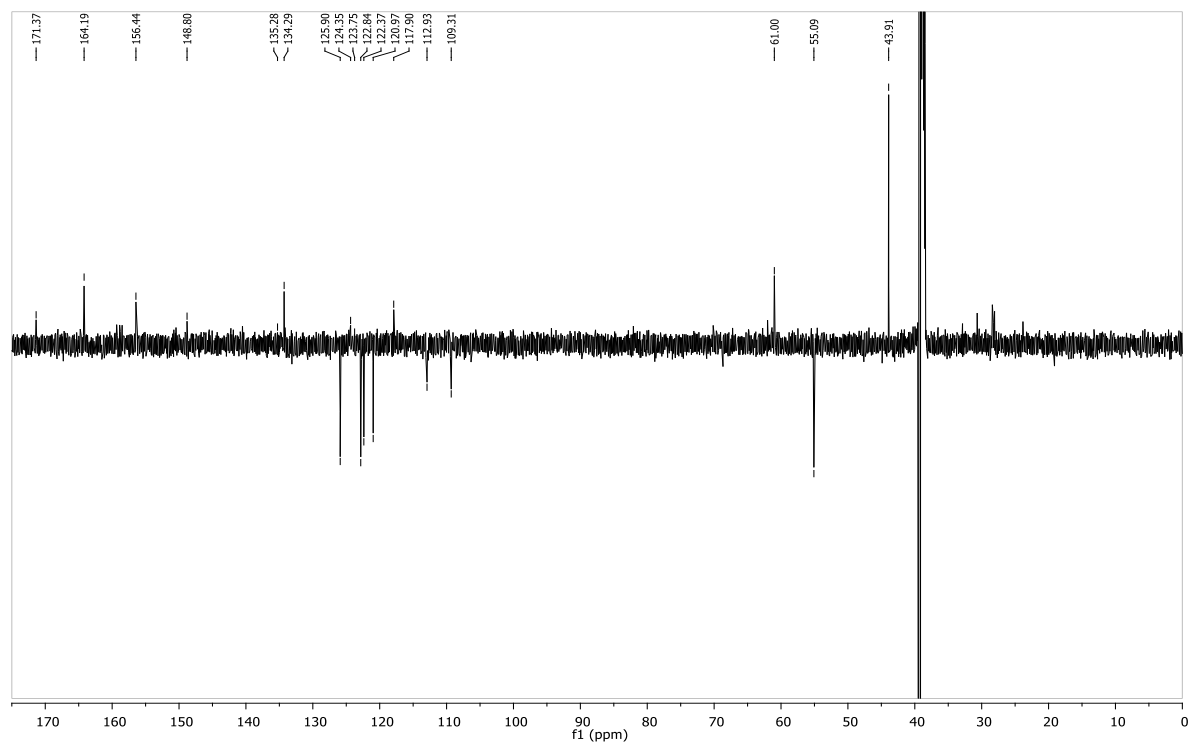

**Fig. S63** a)  $^1\text{H}$  NMR and b)  $^{13}\text{C}$  NMR of compd. **37a**

a)

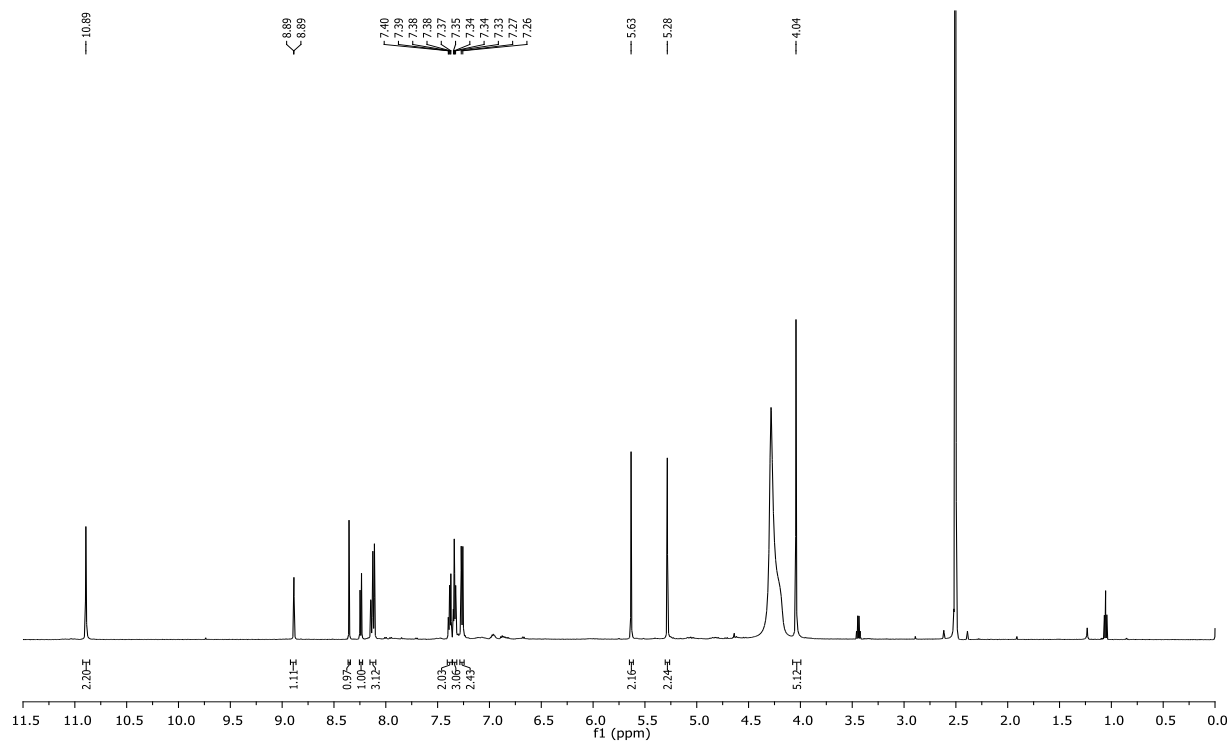

b)

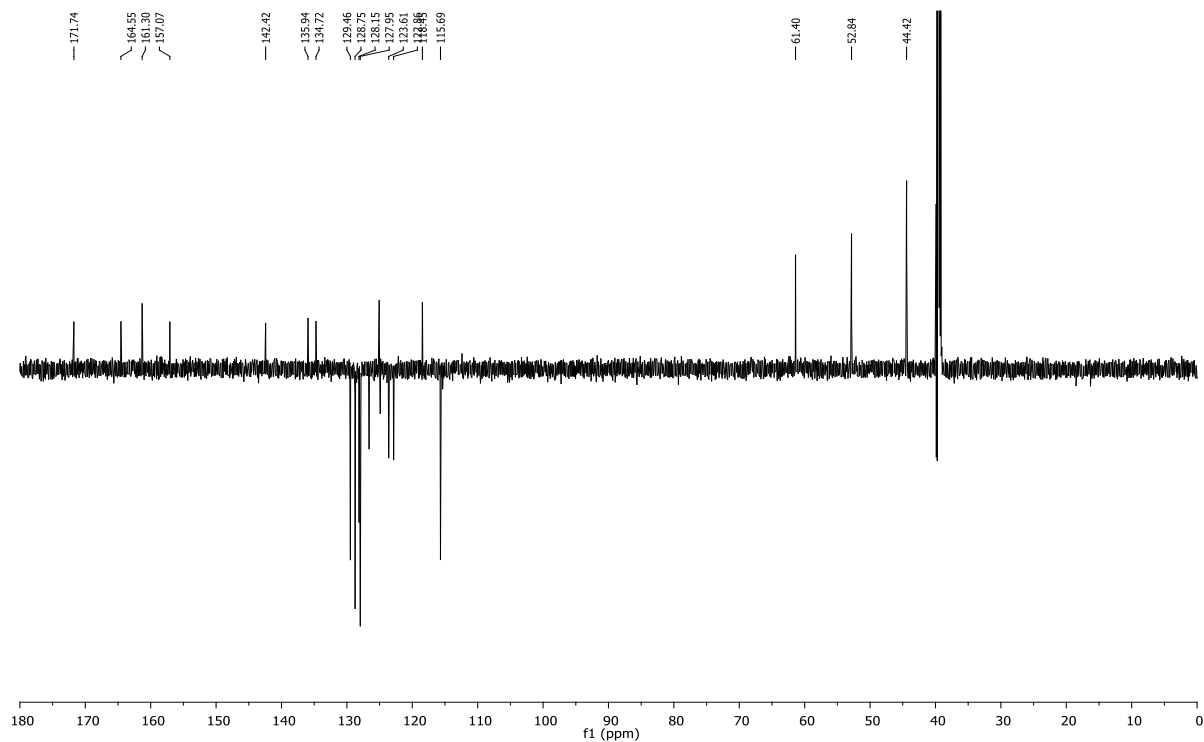

**Fig. S64** a)  $^1\text{H}$  NMR and b)  $^{13}\text{C}$  NMR of compd. **37b**

a)

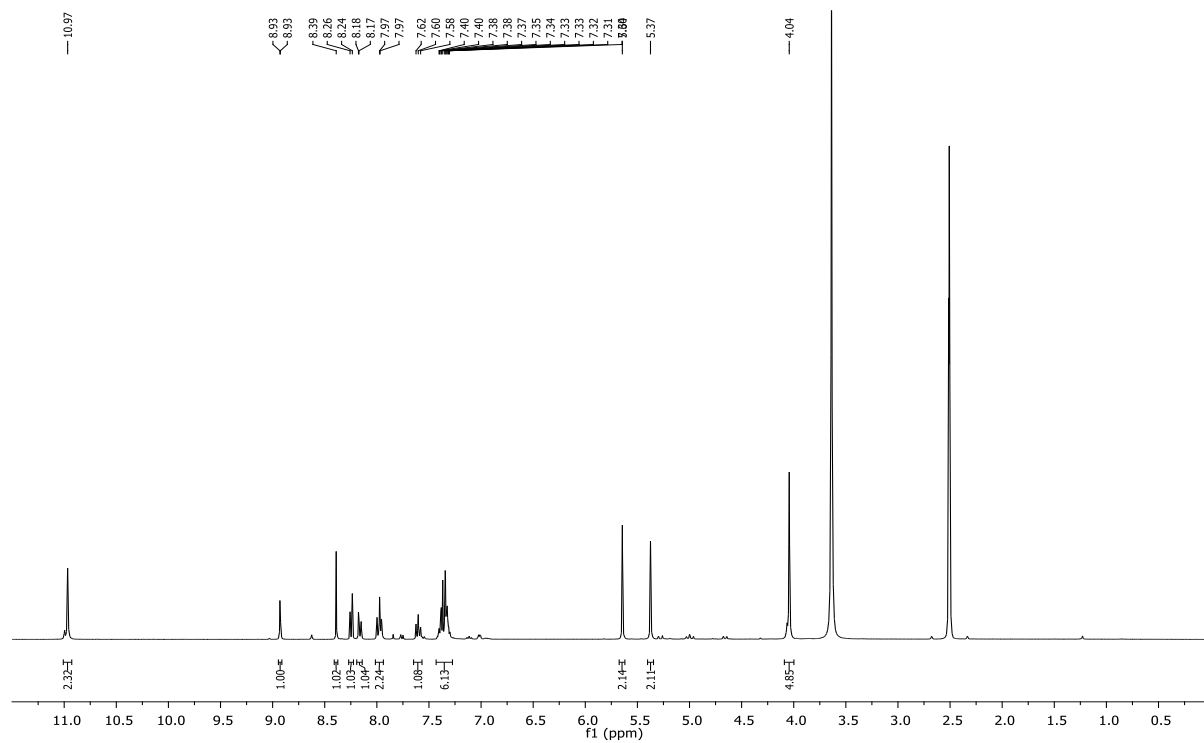

b)

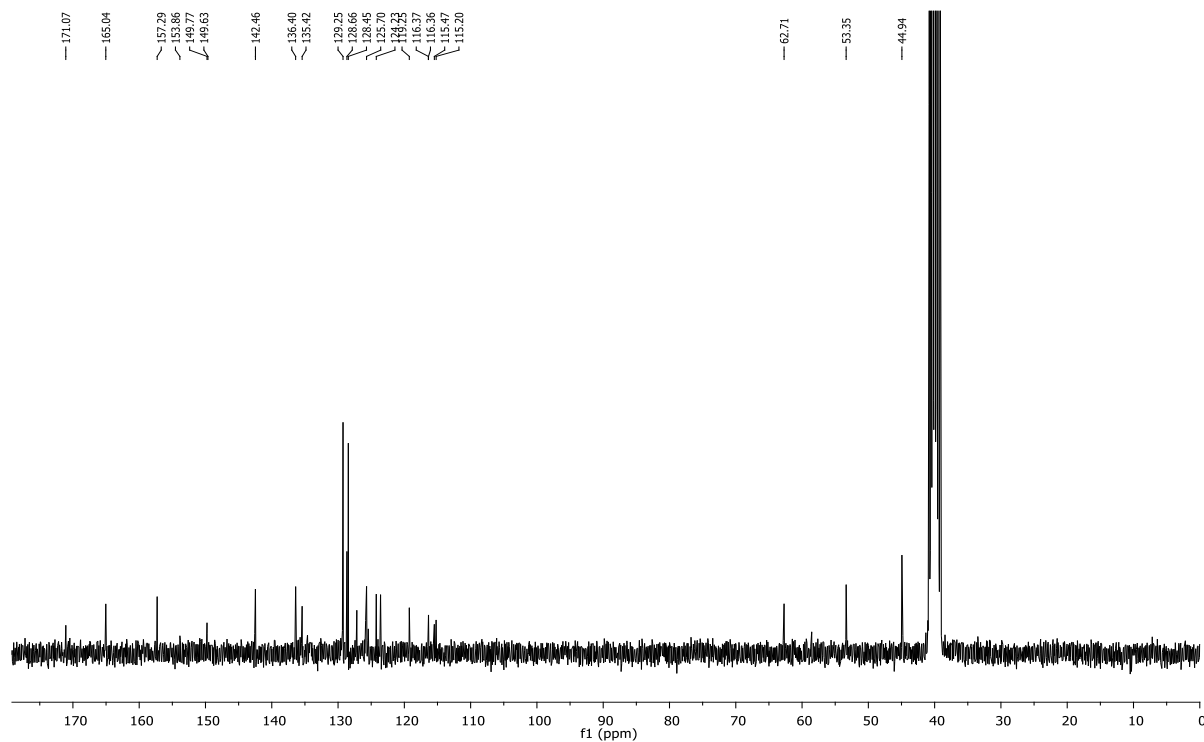

**Fig. S65** a)  $^1\text{H}$  NMR and b)  $^{13}\text{C}$  NMR of compd. **37c**

a)

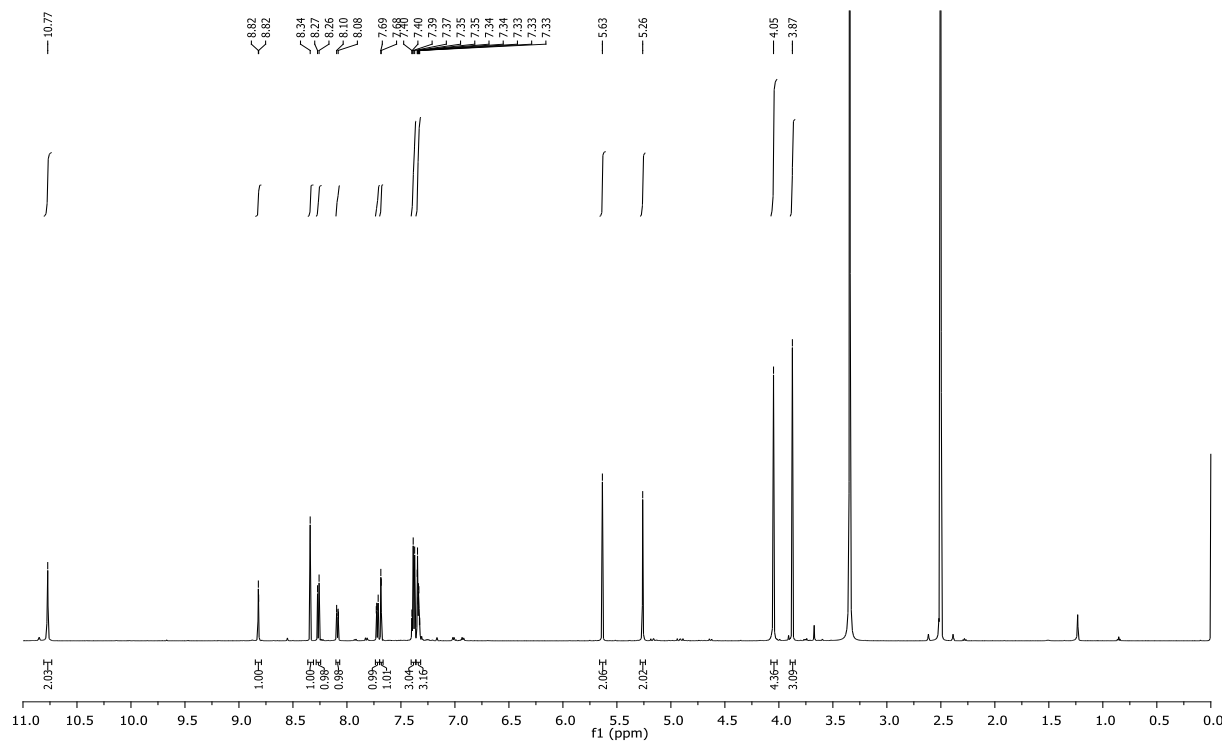

b)

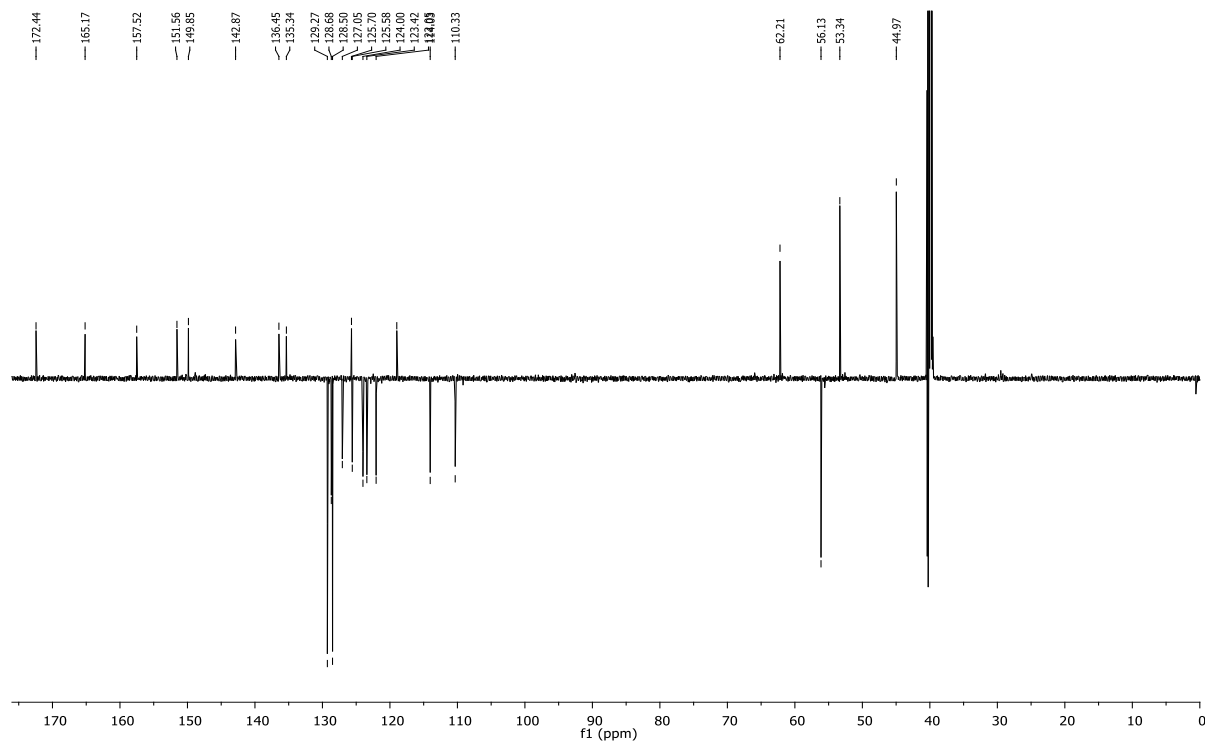

Supplement: s1 [file s1]
